# Supplementary material for: Genetic Mechanisms Shaping the Evolution of an Ancient Myostatin Promoter/enhancer Across Bony Vertebrates
Source: Research Square preprint supplement (doi:10.21203/rs.3.rs-6733976/v1), 2025-07-23
Supplement: Supplementary file 1 [file 10deccb0b0122586c9cfd2df.xlsx]

## Sheet: Table S3
Supplemental Table S3. MSTN Core Promoter %id comparison between clades consensus sequence to each species sequence (box plot results in Fig. 1).
Clade	Specie	Sequences %id
		Core promoter	Entire Promoter
Teleostei	D.rerio	80	-
	G.morhua	92	-
	G.aculeatus	97.3	-
	T.nigroviridis	89.3	-
	T.rubripes	93.3	-
	O.niloticus	100	-
	O.latipes	84	-
	P.formosa	80	-
Sauropsida	G.japonicus	82.7	82.16
	A.carolinensis	76	78,81*
	P.bivittatus	81.3	81.41
	P.mucrosquamatus	80	76,58*
	T.sirtalis	80	78,81*
	P.sinensis	89.3	88.85
	C.picta	89.3	89.22
	C.mydas	90.7	89.22
	A.sinensis	86.7	87.36
	A.mississippiensis	86.7	87.36
	S.camelus	94.7	92.86
	A.platyrhynchos	97.3	93.66
	M.gallopavo	98.7	92.16
	G.gallus	98.7	91.79
	C.carolinensis	96	92.57
	C.anna	96	91.45
	C.pelagica	94.7	92.57
	C.livia	97.3	94.36
	A.forsteri	97.3	94.36
	P.adeliae	96	94.36
	P.crispus	97.3	93.98
	C.striatus	94.7	91.08
	F.albicollis	97.3	92.54
	T.guttata	96	92.91
Squamata	G.japonicus	89.3	92.66
	A.carolinensis	82.7	90.73
	P.bivittatus	93.3	96.91
	P.mucrosquamatus	92	93.82
	T.sirtalis	92	96.14
Aves	S.camelus	92	90.23
	A.platyrhynchos	94.7	91.79
	M.gallopavo	96	90.67
	G.gallus	96	90.3
	C.carolinensis	98.7	92.57
	C.anna	98.7	91.45
	C.pelagica	97.3	91.82
	C.livia	100	93.98
	A.forsteri	100	94.36
	P.adeliae	98.7	94.36
	P.crispus	100	93.98
		97.3	90.71
	F.albicollis	100	92.91
	T.guttata	98.7	92.91
Mammalia	P.cinereus	98.7	92.19
	M.domestica	98.7	93.68
	S.harrisii	98.7	90.71
	D.novemcinctus	100	94.8
	L.africana	97.3	92.57
	E.edwardii	97.3	94.05
	E.telfairi	97.3	91.45
	C.asiatica	93.3	91.82
	E.europaeus	92	87,36*
	S.araneus	100	93.68
	E.caballus	98.7	95.54
	E.asinus	98.7	95.54
	A.jubatus	100	96.28
	F.catus	100	96.28
	C.familiaris	98.7	92.57
	U.maritimus	100	95.91
	A.melanoleuca	100	96.28
	M.putorius	100	95.17
	O.rosmarus	97.3	95.17
	L.weddellii	100	95.54
	R.aegyptiacus	100	95.17
	P.alecto	100	95.54
	P.vampyrus	100	95.17
	H.armiger	100	95.17
	R.sinicus	100	95.91
	M.natalensis	100	93.31
	E.fuscus	88,00*	78,44*
	M.davidii	90,70*	81,04*
	M.lucifugus	88,00*	82,16*
	V.pacos	100	95.17
	C.ferus	100	95.17
	S.scrofa	96	94.8
	O.aries	97.3	92.94
	B.taurus	97.3	93.31
	B.bison	97.3	93.31
	B.acutorostrata	100	95.91
	P.catodon	100	95.91
	T.truncatus	100	95.91
	O.orca	100	96.28
	O.princeps	88,00*	89,22*
	O.cuniculus	97.3	93.31
	C.porcellus	98.7	94.05
	I.tridecemlineatus	98.7	95.17
	M.marmota	98.7	95.54
	J.jaculus	98.7	92.19
	R.norvegicus	96	89,22*
	M.musculus	96	89.96
	P.maniculatus	96	88,48*
	C.griseus	94.7	88,85*
	M.auratus	94.7	88,85*
	M.murinus	98.7	95.91
	O.garnettii	97.3	92.19
	T.syrichta	98.7	94.42
	C.jacchus	97.3	95.54
	C.sabaeus	98.7	95.54
	P.anubis	98.7	95.54
	M.mulatta	98.7	95.17
	N.leucogenys	97.3	95.91
	P.abelii	98.7	96.28
	G.gorilla	98.7	95.91
	P.troglodytes	98.7	96.28
	H.sapiens	98.7	95.91
Code	Meaning
---	No information available.
*	Outliers.
