# Supplementary material for: Genetic Mechanisms Shaping the Evolution of an Ancient Myostatin Promoter/enhancer Across Bony Vertebrates
Source: Research Square preprint supplement (doi:10.21203/rs.3.rs-6733976/v1), 2025-07-23
Supplement: Supplementary file 2 [file 93a5866d15e87fa8bac44428.xlsx]

## Sheet: Table 6A
Supplemental Table S6A. Functional enrichment analysis of Sauropsid proteins predicted to bind to PAX8 module.
#term ID	term description	observed gene count	background gene count	strength	signal	false discovery rate	matching proteins in your network (IDs)	matching proteins in your network (labels)
GO:0031324	Negative regulation of cellular metabolic process	9	2265	0.89	0.86	4.14e-05	9606.ENSP00000296946,9606.ENSP00000312987,9606.ENSP00000343925,9606.ENSP00000344782,9606.ENSP00000351015,9606.ENSP00000365858,9606.ENSP00000405330,9606.ENSP00000455426,9606.ENSP00000492024	TBXT, HNF4A, ESR2, GFI1B, NF1, GATA1, ESR1, ZNF423, PAX6
GO:0045892	Negative regulation of transcription, DNA-templated	8	1322	1.08	1.11	4.14e-05	9606.ENSP00000296946,9606.ENSP00000312987,9606.ENSP00000343925,9606.ENSP00000344782,9606.ENSP00000365858,9606.ENSP00000405330,9606.ENSP00000455426,9606.ENSP00000492024	TBXT, HNF4A, ESR2, GFI1B, GATA1, ESR1, ZNF423, PAX6
GO:0045893	Positive regulation of transcription, DNA-templated	9	1710	1.02	1.03	4.14e-05	9606.ENSP00000263334,9606.ENSP00000296946,9606.ENSP00000312987,9606.ENSP00000343925,9606.ENSP00000344782,9606.ENSP00000365858,9606.ENSP00000405330,9606.ENSP00000455426,9606.ENSP00000492024	PAX8, TBXT, HNF4A, ESR2, GFI1B, GATA1, ESR1, ZNF423, PAX6
GO:0045944	Positive regulation of transcription by RNA polymerase II	8	1250	1.1	1.15	4.14e-05	9606.ENSP00000263334,9606.ENSP00000296946,9606.ENSP00000312987,9606.ENSP00000343925,9606.ENSP00000344782,9606.ENSP00000365858,9606.ENSP00000405330,9606.ENSP00000492024	PAX8, TBXT, HNF4A, ESR2, GFI1B, GATA1, ESR1, PAX6
GO:0051172	Negative regulation of nitrogen compound metabolic process	9	2403	0.87	0.82	5.57e-05	9606.ENSP00000296946,9606.ENSP00000312987,9606.ENSP00000343925,9606.ENSP00000344782,9606.ENSP00000351015,9606.ENSP00000365858,9606.ENSP00000405330,9606.ENSP00000455426,9606.ENSP00000492024	TBXT, HNF4A, ESR2, GFI1B, NF1, GATA1, ESR1, ZNF423, PAX6
GO:0006351	Transcription, DNA-templated	6	518	1.36	1.49	5.74e-05	9606.ENSP00000263334,9606.ENSP00000296946,9606.ENSP00000312987,9606.ENSP00000365858,9606.ENSP00000405330,9606.ENSP00000492024	PAX8, TBXT, HNF4A, GATA1, ESR1, PAX6
GO:0060429	Epithelium development	7	1069	1.11	1.11	9.62e-05	9606.ENSP00000263334,9606.ENSP00000296946,9606.ENSP00000312987,9606.ENSP00000351015,9606.ENSP00000365858,9606.ENSP00000405330,9606.ENSP00000492024	PAX8, TBXT, HNF4A, NF1, GATA1, ESR1, PAX6
GO:0010605	Negative regulation of macromolecule metabolic process	9	2760	0.81	0.73	0.00012	9606.ENSP00000296946,9606.ENSP00000312987,9606.ENSP00000343925,9606.ENSP00000344782,9606.ENSP00000351015,9606.ENSP00000365858,9606.ENSP00000405330,9606.ENSP00000455426,9606.ENSP00000492024	TBXT, HNF4A, ESR2, GFI1B, NF1, GATA1, ESR1, ZNF423, PAX6
GO:0023019	Signal transduction involved in regulation of gene expression	3	23	2.41	2.09	0.00015	9606.ENSP00000296946,9606.ENSP00000312987,9606.ENSP00000492024	TBXT, HNF4A, PAX6
GO:0035270	Endocrine system development	4	130	1.78	1.73	0.00023	9606.ENSP00000263334,9606.ENSP00000312987,9606.ENSP00000351015,9606.ENSP00000492024	PAX8, HNF4A, NF1, PAX6
GO:0006366	Transcription by RNA polymerase II	5	357	1.44	1.42	0.00026	9606.ENSP00000296946,9606.ENSP00000312987,9606.ENSP00000365858,9606.ENSP00000405330,9606.ENSP00000492024	TBXT, HNF4A, GATA1, ESR1, PAX6
GO:0048523	Negative regulation of cellular process	10	4736	0.62	0.52	0.00032	9606.ENSP00000263334,9606.ENSP00000296946,9606.ENSP00000312987,9606.ENSP00000343925,9606.ENSP00000344782,9606.ENSP00000351015,9606.ENSP00000365858,9606.ENSP00000405330,9606.ENSP00000455426,9606.ENSP00000492024	PAX8, TBXT, HNF4A, ESR2, GFI1B, NF1, GATA1, ESR1, ZNF423, PAX6
GO:0010468	Regulation of gene expression	10	4899	0.6	0.5	0.00043	9606.ENSP00000263334,9606.ENSP00000296946,9606.ENSP00000312987,9606.ENSP00000343925,9606.ENSP00000344782,9606.ENSP00000351015,9606.ENSP00000365858,9606.ENSP00000405330,9606.ENSP00000455426,9606.ENSP00000492024	PAX8, TBXT, HNF4A, ESR2, GFI1B, NF1, GATA1, ESR1, ZNF423, PAX6
GO:0048732	Gland development	5	419	1.37	1.28	0.00048	9606.ENSP00000263334,9606.ENSP00000312987,9606.ENSP00000351015,9606.ENSP00000405330,9606.ENSP00000492024	PAX8, HNF4A, NF1, ESR1, PAX6
GO:0002064	Epithelial cell development	4	190	1.62	1.43	0.00073	9606.ENSP00000312987,9606.ENSP00000365858,9606.ENSP00000405330,9606.ENSP00000492024	HNF4A, GATA1, ESR1, PAX6
GO:0032870	Cellular response to hormone stimulus	5	489	1.3	1.16	0.00082	9606.ENSP00000263334,9606.ENSP00000312987,9606.ENSP00000343925,9606.ENSP00000365858,9606.ENSP00000405330	PAX8, HNF4A, ESR2, GATA1, ESR1
GO:0071396	Cellular response to lipid	5	502	1.29	1.14	0.00091	9606.ENSP00000296946,9606.ENSP00000312987,9606.ENSP00000343925,9606.ENSP00000365858,9606.ENSP00000405330	TBXT, HNF4A, ESR2, GATA1, ESR1
GO:0000122	Negative regulation of transcription by RNA polymerase II	6	971	1.09	0.94	0.00092	9606.ENSP00000296946,9606.ENSP00000343925,9606.ENSP00000344782,9606.ENSP00000365858,9606.ENSP00000405330,9606.ENSP00000492024	TBXT, ESR2, GFI1B, GATA1, ESR1, PAX6
GO:0048522	Positive regulation of cellular process	10	5584	0.55	0.44	0.0011	9606.ENSP00000263334,9606.ENSP00000296946,9606.ENSP00000312987,9606.ENSP00000343925,9606.ENSP00000344782,9606.ENSP00000351015,9606.ENSP00000365858,9606.ENSP00000405330,9606.ENSP00000455426,9606.ENSP00000492024	PAX8, TBXT, HNF4A, ESR2, GFI1B, NF1, GATA1, ESR1, ZNF423, PAX6
GO:0031323	Regulation of cellular metabolic process	10	5681	0.54	0.43	0.0012	9606.ENSP00000263334,9606.ENSP00000296946,9606.ENSP00000312987,9606.ENSP00000343925,9606.ENSP00000344782,9606.ENSP00000351015,9606.ENSP00000365858,9606.ENSP00000405330,9606.ENSP00000455426,9606.ENSP00000492024	PAX8, TBXT, HNF4A, ESR2, GFI1B, NF1, GATA1, ESR1, ZNF423, PAX6
GO:0051171	Regulation of nitrogen compound metabolic process	10	5734	0.54	0.43	0.0013	9606.ENSP00000263334,9606.ENSP00000296946,9606.ENSP00000312987,9606.ENSP00000343925,9606.ENSP00000344782,9606.ENSP00000351015,9606.ENSP00000365858,9606.ENSP00000405330,9606.ENSP00000455426,9606.ENSP00000492024	PAX8, TBXT, HNF4A, ESR2, GFI1B, NF1, GATA1, ESR1, ZNF423, PAX6
GO:0051239	Regulation of multicellular organismal process	8	2749	0.76	0.6	0.0015	9606.ENSP00000263334,9606.ENSP00000312987,9606.ENSP00000344782,9606.ENSP00000351015,9606.ENSP00000365858,9606.ENSP00000405330,9606.ENSP00000455426,9606.ENSP00000492024	PAX8, HNF4A, GFI1B, NF1, GATA1, ESR1, ZNF423, PAX6
GO:0080090	Regulation of primary metabolic process	10	5899	0.52	0.41	0.0016	9606.ENSP00000263334,9606.ENSP00000296946,9606.ENSP00000312987,9606.ENSP00000343925,9606.ENSP00000344782,9606.ENSP00000351015,9606.ENSP00000365858,9606.ENSP00000405330,9606.ENSP00000455426,9606.ENSP00000492024	PAX8, TBXT, HNF4A, ESR2, GFI1B, NF1, GATA1, ESR1, ZNF423, PAX6
GO:0030855	Epithelial cell differentiation	5	617	1.2	0.99	0.0018	9606.ENSP00000263334,9606.ENSP00000312987,9606.ENSP00000365858,9606.ENSP00000405330,9606.ENSP00000492024	PAX8, HNF4A, GATA1, ESR1, PAX6
GO:0071310	Cellular response to organic substance	7	2019	0.83	0.64	0.0027	9606.ENSP00000263334,9606.ENSP00000296946,9606.ENSP00000312987,9606.ENSP00000343925,9606.ENSP00000365858,9606.ENSP00000405330,9606.ENSP00000492024	PAX8, TBXT, HNF4A, ESR2, GATA1, ESR1, PAX6
GO:0007406	Negative regulation of neuroblast proliferation	2	9	2.64	1.42	0.0031	9606.ENSP00000351015,9606.ENSP00000492024	NF1, PAX6
GO:0008283	Cell population proliferation	5	712	1.14	0.88	0.0032	9606.ENSP00000296946,9606.ENSP00000351015,9606.ENSP00000365858,9606.ENSP00000405330,9606.ENSP00000492024	TBXT, NF1, GATA1, ESR1, PAX6
GO:2000026	Regulation of multicellular organismal development	6	1389	0.93	0.69	0.0047	9606.ENSP00000263334,9606.ENSP00000312987,9606.ENSP00000344782,9606.ENSP00000351015,9606.ENSP00000365858,9606.ENSP00000492024	PAX8, HNF4A, GFI1B, NF1, GATA1, PAX6
GO:0030154	Cell differentiation	8	3507	0.65	0.47	0.0070	9606.ENSP00000263334,9606.ENSP00000296946,9606.ENSP00000312987,9606.ENSP00000351015,9606.ENSP00000365858,9606.ENSP00000405330,9606.ENSP00000455426,9606.ENSP00000492024	PAX8, TBXT, HNF4A, NF1, GATA1, ESR1, ZNF423, PAX6
GO:0033028	Myeloid cell apoptotic process	2	16	2.39	1.19	0.0074	9606.ENSP00000351015,9606.ENSP00000365858	NF1, GATA1
GO:0023052	Signaling	9	5057	0.54	0.39	0.0077	9606.ENSP00000263334,9606.ENSP00000296946,9606.ENSP00000312987,9606.ENSP00000343925,9606.ENSP00000351015,9606.ENSP00000365858,9606.ENSP00000405330,9606.ENSP00000455426,9606.ENSP00000492024	PAX8, TBXT, HNF4A, ESR2, NF1, GATA1, ESR1, ZNF423, PAX6
GO:0035295	Tube development	5	880	1.05	0.74	0.0077	9606.ENSP00000263334,9606.ENSP00000296946,9606.ENSP00000351015,9606.ENSP00000405330,9606.ENSP00000492024	PAX8, TBXT, NF1, ESR1, PAX6
GO:0007154	Cell communication	9	5165	0.54	0.39	0.0087	9606.ENSP00000263334,9606.ENSP00000296946,9606.ENSP00000312987,9606.ENSP00000343925,9606.ENSP00000351015,9606.ENSP00000365858,9606.ENSP00000405330,9606.ENSP00000455426,9606.ENSP00000492024	PAX8, TBXT, HNF4A, ESR2, NF1, GATA1, ESR1, ZNF423, PAX6
GO:0050793	Regulation of developmental process	7	2492	0.74	0.52	0.0087	9606.ENSP00000263334,9606.ENSP00000312987,9606.ENSP00000344782,9606.ENSP00000351015,9606.ENSP00000365858,9606.ENSP00000405330,9606.ENSP00000492024	PAX8, HNF4A, GFI1B, NF1, GATA1, ESR1, PAX6
GO:0009611	Response to wounding	4	444	1.25	0.84	0.0095	9606.ENSP00000312987,9606.ENSP00000351015,9606.ENSP00000365858,9606.ENSP00000492024	HNF4A, NF1, GATA1, PAX6
GO:0048646	Anatomical structure formation involved in morphogenesis	5	938	1.02	0.7	0.0096	9606.ENSP00000263334,9606.ENSP00000296946,9606.ENSP00000351015,9606.ENSP00000365858,9606.ENSP00000492024	PAX8, TBXT, NF1, GATA1, PAX6
GO:0008284	Positive regulation of cell population proliferation	5	945	1.02	0.69	0.0098	9606.ENSP00000296946,9606.ENSP00000351015,9606.ENSP00000365858,9606.ENSP00000405330,9606.ENSP00000492024	TBXT, NF1, GATA1, ESR1, PAX6
GO:0048568	Embryonic organ development	4	454	1.24	0.83	0.0098	9606.ENSP00000263334,9606.ENSP00000296946,9606.ENSP00000365858,9606.ENSP00000492024	PAX8, TBXT, GATA1, PAX6
GO:0071371	Cellular response to gonadotropin stimulus	2	20	2.29	1.12	0.0098	9606.ENSP00000263334,9606.ENSP00000365858	PAX8, GATA1
GO:0042127	Regulation of cell population proliferation	6	1669	0.85	0.58	0.0102	9606.ENSP00000296946,9606.ENSP00000312987,9606.ENSP00000351015,9606.ENSP00000365858,9606.ENSP00000405330,9606.ENSP00000492024	TBXT, HNF4A, NF1, GATA1, ESR1, PAX6
GO:0030520	Intracellular estrogen receptor signaling pathway	2	22	2.25	1.09	0.0110	9606.ENSP00000343925,9606.ENSP00000405330	ESR2, ESR1
GO:0009887	Animal organ morphogenesis	5	997	0.99	0.66	0.0116	9606.ENSP00000263334,9606.ENSP00000296946,9606.ENSP00000351015,9606.ENSP00000405330,9606.ENSP00000492024	PAX8, TBXT, NF1, ESR1, PAX6
GO:0021915	Neural tube development	3	164	1.56	0.94	0.0116	9606.ENSP00000296946,9606.ENSP00000351015,9606.ENSP00000492024	TBXT, NF1, PAX6
GO:0048731	System development	8	3867	0.61	0.42	0.0116	9606.ENSP00000263334,9606.ENSP00000296946,9606.ENSP00000312987,9606.ENSP00000351015,9606.ENSP00000365858,9606.ENSP00000405330,9606.ENSP00000455426,9606.ENSP00000492024	PAX8, TBXT, HNF4A, NF1, GATA1, ESR1, ZNF423, PAX6
GO:0003309	Type B pancreatic cell differentiation	2	24	2.22	1.06	0.0121	9606.ENSP00000312987,9606.ENSP00000492024	HNF4A, PAX6
GO:0051241	Negative regulation of multicellular organismal process	5	1035	0.98	0.64	0.0131	9606.ENSP00000263334,9606.ENSP00000351015,9606.ENSP00000365858,9606.ENSP00000455426,9606.ENSP00000492024	PAX8, NF1, GATA1, ZNF423, PAX6
GO:0071407	Cellular response to organic cyclic compound	4	508	1.19	0.76	0.0132	9606.ENSP00000312987,9606.ENSP00000343925,9606.ENSP00000365858,9606.ENSP00000405330	HNF4A, ESR2, GATA1, ESR1
GO:0009790	Embryo development	5	1049	0.97	0.64	0.0137	9606.ENSP00000263334,9606.ENSP00000296946,9606.ENSP00000351015,9606.ENSP00000365858,9606.ENSP00000492024	PAX8, TBXT, NF1, GATA1, PAX6
GO:0002068	Glandular epithelial cell development	2	29	2.13	0.98	0.0166	9606.ENSP00000312987,9606.ENSP00000492024	HNF4A, PAX6
GO:1903530	Regulation of secretion by cell	4	564	1.15	0.7	0.0186	9606.ENSP00000263334,9606.ENSP00000312987,9606.ENSP00000351015,9606.ENSP00000365858	PAX8, HNF4A, NF1, GATA1
GO:0044092	Negative regulation of molecular function	5	1143	0.94	0.59	0.0192	9606.ENSP00000296946,9606.ENSP00000343925,9606.ENSP00000351015,9606.ENSP00000365858,9606.ENSP00000405330	TBXT, ESR2, NF1, GATA1, ESR1
GO:0033032	Regulation of myeloid cell apoptotic process	2	33	2.08	0.93	0.0198	9606.ENSP00000351015,9606.ENSP00000365858	NF1, GATA1
GO:0048144	Fibroblast proliferation	2	34	2.06	0.92	0.0208	9606.ENSP00000351015,9606.ENSP00000405330	NF1, ESR1
GO:0071392	Cellular response to estradiol stimulus	2	40	1.99	0.85	0.0276	9606.ENSP00000343925,9606.ENSP00000405330	ESR2, ESR1
GO:0043009	Chordate embryonic development	4	654	1.08	0.61	0.0298	9606.ENSP00000296946,9606.ENSP00000351015,9606.ENSP00000365858,9606.ENSP00000492024	TBXT, NF1, GATA1, PAX6
GO:0045165	Cell fate commitment	3	250	1.37	0.71	0.0315	9606.ENSP00000296946,9606.ENSP00000365858,9606.ENSP00000492024	TBXT, GATA1, PAX6
GO:0035239	Tube morphogenesis	4	669	1.07	0.6	0.0319	9606.ENSP00000263334,9606.ENSP00000296946,9606.ENSP00000351015,9606.ENSP00000405330	PAX8, TBXT, NF1, ESR1
GO:0048513	Animal organ development	7	3246	0.63	0.39	0.0329	9606.ENSP00000263334,9606.ENSP00000296946,9606.ENSP00000312987,9606.ENSP00000351015,9606.ENSP00000365858,9606.ENSP00000405330,9606.ENSP00000492024	PAX8, TBXT, HNF4A, NF1, GATA1, ESR1, PAX6
GO:2001239	Regulation of extrinsic apoptotic signaling pathway in absence of ligand	2	46	1.93	0.8	0.0335	9606.ENSP00000351015,9606.ENSP00000365858	NF1, GATA1
GO:0051716	Cellular response to stimulus	9	6357	0.45	0.3	0.0348	9606.ENSP00000263334,9606.ENSP00000296946,9606.ENSP00000312987,9606.ENSP00000343925,9606.ENSP00000351015,9606.ENSP00000365858,9606.ENSP00000405330,9606.ENSP00000455426,9606.ENSP00000492024	PAX8, TBXT, HNF4A, ESR2, NF1, GATA1, ESR1, ZNF423, PAX6
GO:0009653	Anatomical structure morphogenesis	6	2229	0.72	0.43	0.0374	9606.ENSP00000263334,9606.ENSP00000296946,9606.ENSP00000351015,9606.ENSP00000365858,9606.ENSP00000405330,9606.ENSP00000492024	PAX8, TBXT, NF1, GATA1, ESR1, PAX6
GO:0007165	Signal transduction	8	4714	0.52	0.33	0.0376	9606.ENSP00000263334,9606.ENSP00000296946,9606.ENSP00000312987,9606.ENSP00000343925,9606.ENSP00000351015,9606.ENSP00000405330,9606.ENSP00000455426,9606.ENSP00000492024	PAX8, TBXT, HNF4A, ESR2, NF1, ESR1, ZNF423, PAX6
GO:0007405	Neuroblast proliferation	2	50	1.9	0.77	0.0376	9606.ENSP00000351015,9606.ENSP00000492024	NF1, PAX6
GO:0008285	Negative regulation of cell population proliferation	4	713	1.04	0.57	0.0376	9606.ENSP00000312987,9606.ENSP00000351015,9606.ENSP00000365858,9606.ENSP00000492024	HNF4A, NF1, GATA1, PAX6
GO:0010646	Regulation of cell communication	7	3355	0.61	0.37	0.0376	9606.ENSP00000263334,9606.ENSP00000312987,9606.ENSP00000343925,9606.ENSP00000351015,9606.ENSP00000365858,9606.ENSP00000405330,9606.ENSP00000455426	PAX8, HNF4A, ESR2, NF1, GATA1, ESR1, ZNF423
GO:0023051	Regulation of signaling	7	3367	0.61	0.37	0.0376	9606.ENSP00000263334,9606.ENSP00000312987,9606.ENSP00000343925,9606.ENSP00000351015,9606.ENSP00000365858,9606.ENSP00000405330,9606.ENSP00000455426	PAX8, HNF4A, ESR2, NF1, GATA1, ESR1, ZNF423
GO:0033365	Protein localization to organelle	4	713	1.04	0.57	0.0376	9606.ENSP00000351015,9606.ENSP00000405330,9606.ENSP00000455426,9606.ENSP00000492024	NF1, ESR1, ZNF423, PAX6
GO:0060688	Regulation of morphogenesis of a branching structure	2	51	1.89	0.77	0.0376	9606.ENSP00000263334,9606.ENSP00000405330	PAX8, ESR1
GO:0090596	Sensory organ morphogenesis	3	276	1.33	0.67	0.0376	9606.ENSP00000263334,9606.ENSP00000351015,9606.ENSP00000492024	PAX8, NF1, PAX6
GO:0007548	Sex differentiation	3	282	1.32	0.66	0.0390	9606.ENSP00000312987,9606.ENSP00000365858,9606.ENSP00000405330	HNF4A, GATA1, ESR1
GO:2000677	Regulation of transcription regulatory region DNA binding	2	54	1.86	0.75	0.0406	9606.ENSP00000365858,9606.ENSP00000492024	GATA1, PAX6
GO:0048562	Embryonic organ morphogenesis	3	300	1.29	0.63	0.0453	9606.ENSP00000263334,9606.ENSP00000296946,9606.ENSP00000492024	PAX8, TBXT, PAX6
GO:0030858	Positive regulation of epithelial cell differentiation	2	60	1.82	0.71	0.0483	9606.ENSP00000263334,9606.ENSP00000492024	PAX8, PAX6
GO:0048708	Astrocyte differentiation	2	61	1.81	0.7	0.0495	9606.ENSP00000351015,9606.ENSP00000492024	NF1, PAX6

## Sheet: Table 6B
Supplemental Table S5B. Functional enrichment analysis of Mammalia proteins predicted to bind to PAX8 module.
#term ID	term description	observed gene count	background gene count	strength	signal	false discovery rate	matching proteins in your network (IDs)	matching proteins in your network (labels)
GO:0045893	Positive regulation of transcription, DNA-templated	11	1710	1.06	1.33	3.43e-08	9606.ENSP00000263334,9606.ENSP00000264637,9606.ENSP00000343925,9606.ENSP00000346879,9606.ENSP00000346886,9606.ENSP00000359319,9606.ENSP00000360266,9606.ENSP00000379904,9606.ENSP00000405330,9606.ENSP00000439120,9606.ENSP00000455426	PAX8, THRA, ESR2, NKX2-1, GABPA, PAX2, JUN, THRB, ESR1, NFE2, ZNF423
GO:0045944	Positive regulation of transcription by RNA polymerase II	9	1250	1.11	1.32	1.32e-06	9606.ENSP00000263334,9606.ENSP00000264637,9606.ENSP00000343925,9606.ENSP00000346879,9606.ENSP00000346886,9606.ENSP00000359319,9606.ENSP00000360266,9606.ENSP00000379904,9606.ENSP00000405330	PAX8, THRA, ESR2, NKX2-1, GABPA, PAX2, JUN, THRB, ESR1
GO:0009719	Response to endogenous stimulus	9	1363	1.07	1.23	1.97e-06	9606.ENSP00000263334,9606.ENSP00000264637,9606.ENSP00000343925,9606.ENSP00000346879,9606.ENSP00000346886,9606.ENSP00000359319,9606.ENSP00000360266,9606.ENSP00000379904,9606.ENSP00000405330	PAX8, THRA, ESR2, NKX2-1, GABPA, PAX2, JUN, THRB, ESR1
GO:0045892	Negative regulation of transcription, DNA-templated	9	1322	1.09	1.26	1.97e-06	9606.ENSP00000264637,9606.ENSP00000343925,9606.ENSP00000346879,9606.ENSP00000346886,9606.ENSP00000359319,9606.ENSP00000360266,9606.ENSP00000379904,9606.ENSP00000405330,9606.ENSP00000455426	THRA, ESR2, NKX2-1, GABPA, PAX2, JUN, THRB, ESR1, ZNF423
GO:0030855	Epithelial cell differentiation	7	617	1.31	1.59	5.50e-06	9606.ENSP00000263334,9606.ENSP00000264637,9606.ENSP00000346879,9606.ENSP00000359319,9606.ENSP00000360266,9606.ENSP00000379904,9606.ENSP00000405330	PAX8, THRA, NKX2-1, PAX2, JUN, THRB, ESR1
GO:0071495	Cellular response to endogenous stimulus	8	1103	1.11	1.24	7.89e-06	9606.ENSP00000263334,9606.ENSP00000264637,9606.ENSP00000343925,9606.ENSP00000346886,9606.ENSP00000359319,9606.ENSP00000360266,9606.ENSP00000379904,9606.ENSP00000405330	PAX8, THRA, ESR2, GABPA, PAX2, JUN, THRB, ESR1
GO:0035295	Tube development	7	880	1.15	1.21	4.74e-05	9606.ENSP00000263334,9606.ENSP00000264637,9606.ENSP00000346879,9606.ENSP00000359319,9606.ENSP00000360266,9606.ENSP00000379904,9606.ENSP00000405330	PAX8, THRA, NKX2-1, PAX2, JUN, THRB, ESR1
GO:0000122	Negative regulation of transcription by RNA polymerase II	7	971	1.11	1.12	8.75e-05	9606.ENSP00000264637,9606.ENSP00000343925,9606.ENSP00000346879,9606.ENSP00000346886,9606.ENSP00000360266,9606.ENSP00000379904,9606.ENSP00000405330	THRA, ESR2, NKX2-1, GABPA, JUN, THRB, ESR1
GO:0009887	Animal organ morphogenesis	7	997	1.1	1.09	9.91e-05	9606.ENSP00000263334,9606.ENSP00000264637,9606.ENSP00000346879,9606.ENSP00000359319,9606.ENSP00000360266,9606.ENSP00000379904,9606.ENSP00000405330	PAX8, THRA, NKX2-1, PAX2, JUN, THRB, ESR1
GO:0060487	Lung epithelial cell differentiation	3	25	2.33	2.0	0.00016	9606.ENSP00000264637,9606.ENSP00000346879,9606.ENSP00000379904	THRA, NKX2-1, THRB
GO:0030878	Thyroid gland development	3	28	2.28	1.93	0.00021	9606.ENSP00000263334,9606.ENSP00000264637,9606.ENSP00000346879	PAX8, THRA, NKX2-1
GO:0009755	Hormone-mediated signaling pathway	4	133	1.73	1.65	0.00025	9606.ENSP00000264637,9606.ENSP00000343925,9606.ENSP00000379904,9606.ENSP00000405330	THRA, ESR2, THRB, ESR1
GO:0010033	Response to organic substance	9	2692	0.78	0.68	0.00025	9606.ENSP00000263334,9606.ENSP00000264637,9606.ENSP00000343925,9606.ENSP00000346879,9606.ENSP00000346886,9606.ENSP00000359319,9606.ENSP00000360266,9606.ENSP00000379904,9606.ENSP00000405330	PAX8, THRA, ESR2, NKX2-1, GABPA, PAX2, JUN, THRB, ESR1
GO:0048754	Branching morphogenesis of an epithelial tube	4	134	1.73	1.65	0.00025	9606.ENSP00000263334,9606.ENSP00000346879,9606.ENSP00000359319,9606.ENSP00000405330	PAX8, NKX2-1, PAX2, ESR1
GO:0051239	Regulation of multicellular organismal process	9	2749	0.77	0.66	0.00029	9606.ENSP00000263334,9606.ENSP00000264637,9606.ENSP00000346879,9606.ENSP00000346886,9606.ENSP00000359319,9606.ENSP00000360266,9606.ENSP00000379904,9606.ENSP00000405330,9606.ENSP00000455426	PAX8, THRA, NKX2-1, GABPA, PAX2, JUN, THRB, ESR1, ZNF423
GO:0009725	Response to hormone	6	762	1.15	1.06	0.00039	9606.ENSP00000263334,9606.ENSP00000264637,9606.ENSP00000343925,9606.ENSP00000346879,9606.ENSP00000379904,9606.ENSP00000405330	PAX8, THRA, ESR2, NKX2-1, THRB, ESR1
GO:0071310	Cellular response to organic substance	8	2019	0.85	0.73	0.00044	9606.ENSP00000263334,9606.ENSP00000264637,9606.ENSP00000343925,9606.ENSP00000346886,9606.ENSP00000359319,9606.ENSP00000360266,9606.ENSP00000379904,9606.ENSP00000405330	PAX8, THRA, ESR2, GABPA, PAX2, JUN, THRB, ESR1
GO:0008050	Female courtship behavior	2	2	3.25	1.85	0.00047	9606.ENSP00000264637,9606.ENSP00000379904	THRA, THRB
GO:0039003	Pronephric field specification	2	2	3.25	1.85	0.00047	9606.ENSP00000263334,9606.ENSP00000359319	PAX8, PAX2
GO:0048732	Gland development	5	419	1.33	1.23	0.00047	9606.ENSP00000263334,9606.ENSP00000264637,9606.ENSP00000346879,9606.ENSP00000360266,9606.ENSP00000405330	PAX8, THRA, NKX2-1, JUN, ESR1
GO:0072305	Negative regulation of mesenchymal cell apoptotic process involved in metanephric nephron morphogenesis	2	2	3.25	1.85	0.00047	9606.ENSP00000263334,9606.ENSP00000359319	PAX8, PAX2
GO:1900215	Negative regulation of apoptotic process involved in metanephric collecting duct development	2	2	3.25	1.85	0.00047	9606.ENSP00000263334,9606.ENSP00000359319	PAX8, PAX2
GO:1900218	Negative regulation of apoptotic process involved in metanephric nephron tubule development	2	2	3.25	1.85	0.00047	9606.ENSP00000263334,9606.ENSP00000359319	PAX8, PAX2
GO:2000594	Positive regulation of metanephric DCT cell differentiation	2	2	3.25	1.85	0.00047	9606.ENSP00000263334,9606.ENSP00000359319	PAX8, PAX2
GO:0002154	Thyroid hormone mediated signaling pathway	2	3	3.08	1.78	0.00061	9606.ENSP00000264637,9606.ENSP00000379904	THRA, THRB
GO:0002157	Positive regulation of thyroid hormone mediated signaling pathway	2	3	3.08	1.78	0.00061	9606.ENSP00000264637,9606.ENSP00000379904	THRA, THRB
GO:0060688	Regulation of morphogenesis of a branching structure	3	51	2.02	1.63	0.00062	9606.ENSP00000263334,9606.ENSP00000359319,9606.ENSP00000405330	PAX8, PAX2, ESR1
GO:0009653	Anatomical structure morphogenesis	8	2229	0.81	0.68	0.00063	9606.ENSP00000263334,9606.ENSP00000264637,9606.ENSP00000346879,9606.ENSP00000346886,9606.ENSP00000359319,9606.ENSP00000360266,9606.ENSP00000379904,9606.ENSP00000405330	PAX8, THRA, NKX2-1, GABPA, PAX2, JUN, THRB, ESR1
GO:0032870	Cellular response to hormone stimulus	5	489	1.26	1.12	0.00075	9606.ENSP00000263334,9606.ENSP00000264637,9606.ENSP00000343925,9606.ENSP00000379904,9606.ENSP00000405330	PAX8, THRA, ESR2, THRB, ESR1
GO:0072108	Positive regulation of mesenchymal to epithelial transition involved in metanephros morphogenesis	2	4	2.95	1.71	0.00079	9606.ENSP00000263334,9606.ENSP00000359319	PAX8, PAX2
GO:0072289	Metanephric nephron tubule formation	2	4	2.95	1.71	0.00079	9606.ENSP00000263334,9606.ENSP00000359319	PAX8, PAX2
GO:0048523	Negative regulation of cellular process	10	4736	0.58	0.47	0.00099	9606.ENSP00000263334,9606.ENSP00000264637,9606.ENSP00000343925,9606.ENSP00000346879,9606.ENSP00000346886,9606.ENSP00000359319,9606.ENSP00000360266,9606.ENSP00000379904,9606.ENSP00000405330,9606.ENSP00000455426	PAX8, THRA, ESR2, NKX2-1, GABPA, PAX2, JUN, THRB, ESR1, ZNF423
GO:0072221	Metanephric distal convoluted tubule development	2	5	2.86	1.65	0.0010	9606.ENSP00000263334,9606.ENSP00000359319	PAX8, PAX2
GO:1905330	Regulation of morphogenesis of an epithelium	3	65	1.92	1.48	0.0011	9606.ENSP00000263334,9606.ENSP00000359319,9606.ENSP00000405330	PAX8, PAX2, ESR1
GO:0030154	Cell differentiation	9	3507	0.66	0.53	0.0012	9606.ENSP00000263334,9606.ENSP00000264637,9606.ENSP00000346879,9606.ENSP00000346886,9606.ENSP00000359319,9606.ENSP00000360266,9606.ENSP00000379904,9606.ENSP00000405330,9606.ENSP00000455426	PAX8, THRA, NKX2-1, GABPA, PAX2, JUN, THRB, ESR1, ZNF423
GO:0072307	Regulation of metanephric nephron tubule epithelial cell differentiation	2	6	2.78	1.59	0.0013	9606.ENSP00000263334,9606.ENSP00000359319	PAX8, PAX2
GO:0045924	Regulation of female receptivity	2	7	2.71	1.53	0.0016	9606.ENSP00000264637,9606.ENSP00000379904	THRA, THRB
GO:2000142	Regulation of DNA-templated transcription, initiation	3	77	1.84	1.38	0.0016	9606.ENSP00000264637,9606.ENSP00000360266,9606.ENSP00000405330	THRA, JUN, ESR1
GO:0003337	Mesenchymal to epithelial transition involved in metanephros morphogenesis	2	8	2.65	1.5	0.0018	9606.ENSP00000263334,9606.ENSP00000359319	PAX8, PAX2
GO:0045898	Regulation of RNA polymerase II transcription preinitiation complex assembly	2	8	2.65	1.5	0.0018	9606.ENSP00000264637,9606.ENSP00000405330	THRA, ESR1
GO:0060509	Type I pneumocyte differentiation	2	8	2.65	1.5	0.0018	9606.ENSP00000264637,9606.ENSP00000379904	THRA, THRB
GO:0035239	Tube morphogenesis	5	669	1.13	0.89	0.0024	9606.ENSP00000263334,9606.ENSP00000346879,9606.ENSP00000359319,9606.ENSP00000360266,9606.ENSP00000405330	PAX8, NKX2-1, PAX2, JUN, ESR1
GO:0007275	Multicellular organism development	9	4209	0.58	0.44	0.0041	9606.ENSP00000263334,9606.ENSP00000264637,9606.ENSP00000346879,9606.ENSP00000346886,9606.ENSP00000359319,9606.ENSP00000360266,9606.ENSP00000379904,9606.ENSP00000405330,9606.ENSP00000455426	PAX8, THRA, NKX2-1, GABPA, PAX2, JUN, THRB, ESR1, ZNF423
GO:0050896	Response to stimulus	11	7835	0.4	0.32	0.0047	9606.ENSP00000263334,9606.ENSP00000264637,9606.ENSP00000343925,9606.ENSP00000346879,9606.ENSP00000346886,9606.ENSP00000359319,9606.ENSP00000360266,9606.ENSP00000379904,9606.ENSP00000405330,9606.ENSP00000439120,9606.ENSP00000455426	PAX8, THRA, ESR2, NKX2-1, GABPA, PAX2, JUN, THRB, ESR1, NFE2, ZNF423
GO:0090190	Positive regulation of branching involved in ureteric bud morphogenesis	2	18	2.3	1.19	0.0061	9606.ENSP00000263334,9606.ENSP00000359319	PAX8, PAX2
GO:0010646	Regulation of cell communication	8	3355	0.63	0.45	0.0078	9606.ENSP00000263334,9606.ENSP00000264637,9606.ENSP00000343925,9606.ENSP00000346879,9606.ENSP00000360266,9606.ENSP00000379904,9606.ENSP00000405330,9606.ENSP00000455426	PAX8, THRA, ESR2, NKX2-1, JUN, THRB, ESR1, ZNF423
GO:0023051	Regulation of signaling	8	3367	0.63	0.45	0.0079	9606.ENSP00000263334,9606.ENSP00000264637,9606.ENSP00000343925,9606.ENSP00000346879,9606.ENSP00000360266,9606.ENSP00000379904,9606.ENSP00000405330,9606.ENSP00000455426	PAX8, THRA, ESR2, NKX2-1, JUN, THRB, ESR1, ZNF423
GO:0030520	Intracellular estrogen receptor signaling pathway	2	22	2.21	1.11	0.0083	9606.ENSP00000343925,9606.ENSP00000405330	ESR2, ESR1
GO:0048646	Anatomical structure formation involved in morphogenesis	5	938	0.98	0.67	0.0094	9606.ENSP00000263334,9606.ENSP00000346879,9606.ENSP00000346886,9606.ENSP00000359319,9606.ENSP00000360266	PAX8, NKX2-1, GABPA, PAX2, JUN
GO:0051716	Cellular response to stimulus	10	6357	0.45	0.34	0.0099	9606.ENSP00000263334,9606.ENSP00000264637,9606.ENSP00000343925,9606.ENSP00000346886,9606.ENSP00000359319,9606.ENSP00000360266,9606.ENSP00000379904,9606.ENSP00000405330,9606.ENSP00000439120,9606.ENSP00000455426	PAX8, THRA, ESR2, GABPA, PAX2, JUN, THRB, ESR1, NFE2, ZNF423
GO:0006351	Transcription, DNA-templated	4	518	1.14	0.72	0.0139	9606.ENSP00000263334,9606.ENSP00000264637,9606.ENSP00000379904,9606.ENSP00000405330	PAX8, THRA, THRB, ESR1
GO:0140467	Integrated stress response signaling	2	31	2.06	0.97	0.0147	9606.ENSP00000360266,9606.ENSP00000439120	JUN, NFE2
GO:1901701	Cellular response to oxygen-containing compound	5	1057	0.93	0.59	0.0155	9606.ENSP00000343925,9606.ENSP00000346886,9606.ENSP00000359319,9606.ENSP00000360266,9606.ENSP00000405330	ESR2, GABPA, PAX2, JUN, ESR1
GO:0048731	System development	8	3867	0.57	0.38	0.0191	9606.ENSP00000263334,9606.ENSP00000264637,9606.ENSP00000346879,9606.ENSP00000359319,9606.ENSP00000360266,9606.ENSP00000379904,9606.ENSP00000405330,9606.ENSP00000455426	PAX8, THRA, NKX2-1, PAX2, JUN, THRB, ESR1, ZNF423
GO:0007423	Sensory organ development	4	577	1.09	0.66	0.0193	9606.ENSP00000263334,9606.ENSP00000359319,9606.ENSP00000360266,9606.ENSP00000379904	PAX8, PAX2, JUN, THRB
GO:0071392	Cellular response to estradiol stimulus	2	40	1.95	0.87	0.0218	9606.ENSP00000343925,9606.ENSP00000405330	ESR2, ESR1
GO:0042789	mRNA transcription by RNA polymerase II	2	44	1.91	0.83	0.0261	9606.ENSP00000264637,9606.ENSP00000379904	THRA, THRB
GO:0001658	Branching involved in ureteric bud morphogenesis	2	45	1.9	0.82	0.0271	9606.ENSP00000263334,9606.ENSP00000359319	PAX8, PAX2
GO:0009966	Regulation of signal transduction	7	2978	0.62	0.39	0.0302	9606.ENSP00000264637,9606.ENSP00000343925,9606.ENSP00000346879,9606.ENSP00000360266,9606.ENSP00000379904,9606.ENSP00000405330,9606.ENSP00000455426	THRA, ESR2, NKX2-1, JUN, THRB, ESR1, ZNF423
GO:0090596	Sensory organ morphogenesis	3	276	1.29	0.64	0.0371	9606.ENSP00000263334,9606.ENSP00000359319,9606.ENSP00000379904	PAX8, PAX2, THRB
GO:0048146	Positive regulation of fibroblast proliferation	2	54	1.82	0.75	0.0372	9606.ENSP00000360266,9606.ENSP00000405330	JUN, ESR1
GO:0007399	Nervous system development	6	2188	0.69	0.4	0.0448	9606.ENSP00000263334,9606.ENSP00000346879,9606.ENSP00000359319,9606.ENSP00000360266,9606.ENSP00000379904,9606.ENSP00000455426	PAX8, NKX2-1, PAX2, JUN, THRB, ZNF423
