# Supplementary material for: Genetic Mechanisms Shaping the Evolution of an Ancient Myostatin Promoter/enhancer Across Bony Vertebrates
Source: Research Square preprint supplement (doi:10.21203/rs.3.rs-6733976/v1), 2025-07-23
Supplement: Supplementary file 2 [file cbbb08f8e909b68cb2801c06.pdf]

**Supplementary Document 1.** Detailed workflow for predicting Transcription Factor Binding Sites (TFBS) using the MultiTF tool within the Mulan platform (Multiple sequence Local Alignment and conservation visualization).

---

1. Visit Mulan website (<https://mulan.dcode.org/>).
2. Select the desired number of species for the alignment (see Figure 1).

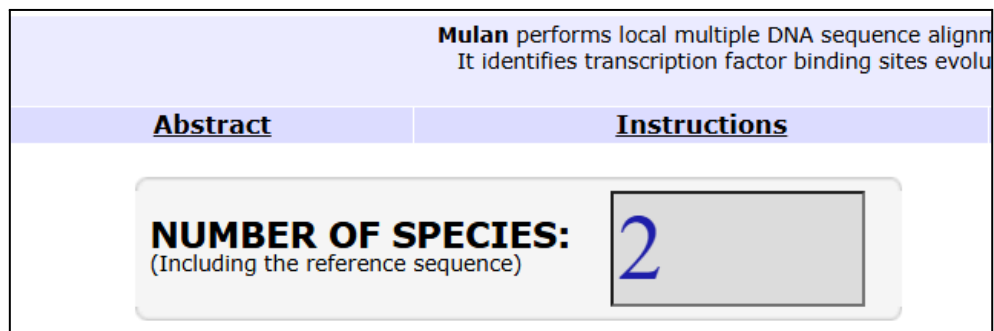

Mulan performs local multiple DNA sequence alignment. It identifies transcription factor binding sites evolutionarily conserved across multiple species.

**Abstract** | **Instructions**

**NUMBER OF SPECIES:**  
(Including the reference sequence)

2

Figure 1

3. In the "ALL FINISHED SEQUENCES :: TBA alignment" section, click on the **"SELECT"** option to access the MultiTF tool (see Figure 2).

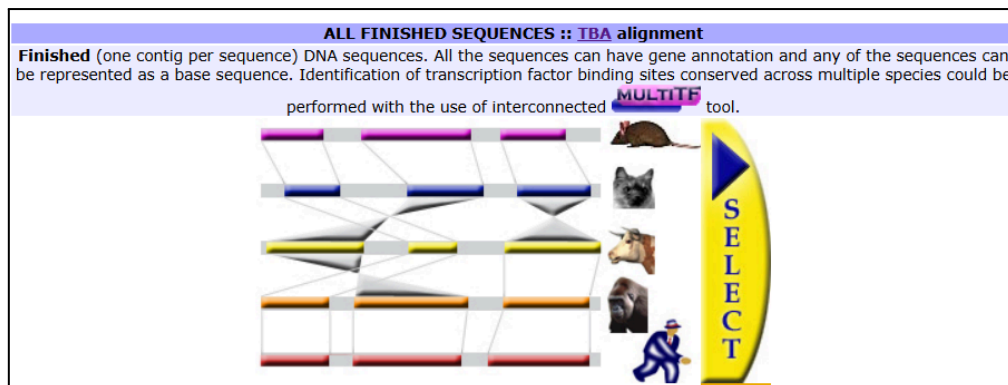

Figure 2

4. Upload the sequences in FASTA format into the designated fields (see Figure 3), then click **"SUBMIT"**. For regulatory element analysis, providing an "Annotation" file is not required.

Mulan
Request ID: m1216083229823492
<https://mulan.dcode.org/>

Batch Upload System  
Concurrently uploads ALL the sequences from the UCSC Genome Browser

### SEQUENCE 1

[Upload](#) sequence and gene annotation from [UCSC Genome Browser](#)

- or -

☒ Paste sequence (in FASTA format )

```
>16 dna:chromosome
chromosome:GRCh38:16:84294356:84294954:1
CCCACATGCCACATCAGGCAGGAGGACCCCGCGGG
TGCAAGGTGGAAGTCGTCTCTTCATGGCTGCACCTT
GGCCAGTGCCAGTCCAGCAGCCTCTTCAAGAAGCTT
```

- or -

☐ FASTA file (.fa)  Nenhum ficheiro selecionado

- or -

☐ NCBI accession #

### OPTIONAL :: ANNOTATION 1

Repeats:

☐ Repeats are identified by lower-case letters

☒ Mask repetitive elements

Gene annotation (if any):

☒ Paste

☐ File  Nenhum ficheiro selecionado

### SEQUENCE 2

[Upload](#) sequence and gene annotation from [UCSC Genome Browser](#)

- or -

☒ Paste sequence (in FASTA format )

```
>16 dna:chromosome
chromosome:GRCh38:16:84294356:84294954:1
CCCACATGCCACATCAGGCAGGAGGACCCCGCGGG
TGCAAGGTGGAAGTCGTCTCTTCATGGCTGCACCTT
GGCCAGTGCCAGTCCAGCAGCCTCTTCAAGAAGCTT
```

- or -

☐ FASTA file (.fa)  Nenhum ficheiro selecionado

- or -

☐ NCBI accession #

### OPTIONAL :: ANNOTATION 2

Repeats:

☐ Repeats are identified by lower-case letters

☒ Mask repetitive elements

Gene annotation (if any):

☒ Paste

☐ File  Nenhum ficheiro selecionado

Figure 3

- Once the sequences are submitted, the system generates a “pitstop” page (Figure 4) that presents the phylogenetic relationships among the compared sequences. Press “**Continue**” on this page (Figure 4).

Request ID: m1119093086518524
<https://mulan.dcode.org/>

### PITSTOP :: PHYLOGENETIC TREE

Preliminary analysis of the submitted sequences indicates following phylogenetic relationships between the input species. Please rearrange the tree structure if the detected branching does not make sense. (*Node-leaf distances are not important at this point*). Then submit the tree to the final alignment step.

Tree structure:

Please follow sequence abbreviations *seq1...seqN* for defining the tree:

```
seq1:16 dna:chromosome chromosome:GRCh38:16:84294356:84294954:1
seq2:16 dna:chromosome chromosome:GRCh38:16:84294356:84294954:1
```

Note: Tree distances are in # of substitutions per 1kb if defined. Otherwise, either 1.0 or 2.0.

Contact [dcode@ncbi.nlm.nih.gov](mailto:dcode@ncbi.nlm.nih.gov) if you have any questions or suggestions

Figure 4

- Select the “**MultiTF**” option to proceed with TFBS prediction (Figure 5).

Request ID: [m1119093086518105](https://mulan.dcode.org/) <https://mulan.dcode.org/>

Dynamic [visualization](#):

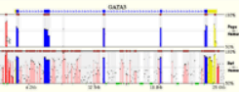

Transcription factor binding sites conserved across all the species:

[submit Mulan alignment to multiTF](#) **MULTITF**

Pairwise dynamic plots:

[seq1\\_seq2](#)

Dot-plots:

[seq1\\_seq2](#)

Update annotation:

edit [anno1 anno2](#)  
[sequence titles](#)

Results & output files:

Mulan alignment file with [16](#) being the base sequence :: [GENERATE](#)

[tba.maf](#) (1.4 kb) :: final [TBA](#) multiple alignment file (blasz textual format)  
[Phylogenetic tree](#) :: evolutionary relationship among the sequences  
[refine.fasta](#) (1.2 kb) :: intermediate multiple alignment file (FASTA format)

pairwise data [list of ECRs](#) [blast-type alignment](#) [blastz alignment](#)  
[seq1\\_seq2](#) [detect ECRs](#) [seq1\\_seq2.blast](#) [seq1\\_seq2.blastz](#)

Input files:

|   | sequence                | seq. masked              | repeats                   | annotation                |
|---|-------------------------|--------------------------|---------------------------|---------------------------|
| 1 | <a href="#">seq1.fa</a> | <a href="#">seq1.txt</a> | <a href="#">seq1.reps</a> | <a href="#">anno1.txt</a> |
| 2 | <a href="#">seq2.fa</a> | <a href="#">seq2.txt</a> | <a href="#">seq2.reps</a> | <a href="#">anno2.txt</a> |

Contact [dcode@ncbi.nlm.nih.gov](mailto:dcode@ncbi.nlm.nih.gov) if you have any questions or suggestions

Figure 5

- On the following page, select “TRANSFAC professional V10.2 library” > “vertebrates” > “Optimized for function” (Figure 6), then click “**SUBMIT**”.

**MULTITF** **DOWNLOADING**

Retrieving Mulan tba.maf alignment file... ok  
 Retrieving sequence and annotation files... ok  
 Retrieving sequence names... ok

**Defining transcription factor binding sites**

☒ TRANSFAC professional V10.2 library

Biological species

☒ vertebrates ☐ insects  
☐ plants ☐ fungi  
☐ nematodes ☐ bacteria

Matrix similarity

☒ Optimized for function  
☐ Predefined as [0.85](#)

Matrix selection

☐ use only high-specificity matrices

☐ User-defined consensus sequences

[SUBMIT](#)

The "optimized for function" option utilizes different cut-off parameters for different TFBS. It corresponds to "not more than 3 TFBS per 10kb of a random sequence" optimization [PMID: 15590941].

"Predefined as" cut-offs measure sequence similarity to Transfac position weight matrices (PWM). Higher the cut-offs are, less sites will be identified.

The "use only high-specificity matrices" option subselects a list of TFBS matrices that have <= 0.85 "optimized for function" cut-off similarity to the corresponding Transfac PWM. These are the matrices that have many consistent definition sequences in the Transfac database.

Figure 6

8. On the “SELECT TRANSCRIPTION FACTORS” page, click “**SELECT ALL**” and then “**SUBMIT**” (Figure 7).

O .. P

|                                            |                                                |                                             |                                                |                                             |                                             |                                                |                                             |
|--------------------------------------------|------------------------------------------------|---------------------------------------------|------------------------------------------------|---------------------------------------------|---------------------------------------------|------------------------------------------------|---------------------------------------------|
| <input checked="" type="checkbox"/> OCT1_B | <input checked="" type="checkbox"/> OCT1_Q5    | <input checked="" type="checkbox"/> OCT1_Q6 | <input checked="" type="checkbox"/> OCT4       | <input checked="" type="checkbox"/> OCT_C   | <input checked="" type="checkbox"/> OCT_Q6  | <input checked="" type="checkbox"/> OLF1       | <input checked="" type="checkbox"/> OSF2_Q6 |
| <input checked="" type="checkbox"/> OTX_Q1 | <input checked="" type="checkbox"/> P300       | <input checked="" type="checkbox"/> P53     | <input checked="" type="checkbox"/> P53_DECAME | <input checked="" type="checkbox"/> PADS_C  | <input checked="" type="checkbox"/> PAX1_B  | <input checked="" type="checkbox"/> PAX2       | <input checked="" type="checkbox"/> PAX3    |
| <input checked="" type="checkbox"/> PAX3_B | <input checked="" type="checkbox"/> PAX4       | <input checked="" type="checkbox"/> PAX5    | <input checked="" type="checkbox"/> PAX6       | <input checked="" type="checkbox"/> PAX6_Q2 | <input checked="" type="checkbox"/> PAX8    | <input checked="" type="checkbox"/> PAX8_B     | <input checked="" type="checkbox"/> PAX9_B  |
| <input checked="" type="checkbox"/> PAX_Q6 | <input checked="" type="checkbox"/> PBX1       | <input checked="" type="checkbox"/> PBX_Q3  | <input checked="" type="checkbox"/> PEA3_Q6    | <input checked="" type="checkbox"/> PEBP_Q6 | <input checked="" type="checkbox"/> PIT1_Q6 | <input checked="" type="checkbox"/> PITX2_Q2   | <input checked="" type="checkbox"/> PLZF    |
| <input checked="" type="checkbox"/> POLY_C | <input checked="" type="checkbox"/> POU1F1_Q6  | <input checked="" type="checkbox"/> POU3F2  | <input checked="" type="checkbox"/> POU6F1     | <input checked="" type="checkbox"/> PPARA   | <input checked="" type="checkbox"/> PPARG   | <input checked="" type="checkbox"/> PPAR_DR1_Q | <input checked="" type="checkbox"/> PR      |
| <input checked="" type="checkbox"/> PR_Q2  | <input checked="" type="checkbox"/> PTF1BETA_Q | <input checked="" type="checkbox"/> PU1_Q6  | <input checked="" type="checkbox"/> PXR_Q2     |                                             |                                             |                                                |                                             |

R .. S

|                                              |                                              |                                               |                                             |                                               |                                              |                                            |                                              |
|----------------------------------------------|----------------------------------------------|-----------------------------------------------|---------------------------------------------|-----------------------------------------------|----------------------------------------------|--------------------------------------------|----------------------------------------------|
| <input checked="" type="checkbox"/> RBPJK    | <input checked="" type="checkbox"/> RBPJK_Q4 | <input checked="" type="checkbox"/> RFX1      | <input checked="" type="checkbox"/> RFX_Q6  | <input checked="" type="checkbox"/> ROAZ      | <input checked="" type="checkbox"/> RORA1    | <input checked="" type="checkbox"/> RORA2  | <input checked="" type="checkbox"/> RP58     |
| <input checked="" type="checkbox"/> RREB1    | <input checked="" type="checkbox"/> RSRFC4   | <input checked="" type="checkbox"/> RSRFC4_Q2 | <input checked="" type="checkbox"/> RUSH1A  | <input checked="" type="checkbox"/> S8        | <input checked="" type="checkbox"/> SEF1_C   | <input checked="" type="checkbox"/> SF1_Q6 | <input checked="" type="checkbox"/> SMAD3_Q6 |
| <input checked="" type="checkbox"/> SMAD4_Q6 | <input checked="" type="checkbox"/> SMAD_Q6  | <input checked="" type="checkbox"/> SOX5      | <input checked="" type="checkbox"/> SOX9_B1 | <input checked="" type="checkbox"/> SOX_Q6    | <input checked="" type="checkbox"/> SP1      | <input checked="" type="checkbox"/> SP1_Q2 | <input checked="" type="checkbox"/> SP1_Q4   |
| <input checked="" type="checkbox"/> SP1_Q6   | <input checked="" type="checkbox"/> SP3_Q3   | <input checked="" type="checkbox"/> SPZ1      | <input checked="" type="checkbox"/> SREBP1  | <input checked="" type="checkbox"/> SREBP1_Q6 | <input checked="" type="checkbox"/> SREBP_Q3 | <input checked="" type="checkbox"/> SRF    | <input checked="" type="checkbox"/> SRF_C    |
| <input checked="" type="checkbox"/> SRF_Q4   | <input checked="" type="checkbox"/> SRF_Q5   | <input checked="" type="checkbox"/> SRF_Q6    | <input checked="" type="checkbox"/> SRY     | <input checked="" type="checkbox"/> STAF      | <input checked="" type="checkbox"/> STAT     | <input checked="" type="checkbox"/> STAT1  | <input checked="" type="checkbox"/> STAT3    |
| <input checked="" type="checkbox"/> STAT4    | <input checked="" type="checkbox"/> STAT5A   | <input checked="" type="checkbox"/> STAT5B    | <input checked="" type="checkbox"/> STAT6   | <input checked="" type="checkbox"/> STAT_Q6   | <input checked="" type="checkbox"/> STRA13   | <input checked="" type="checkbox"/> SZF11  |                                              |

T

|                                              |                                             |                                               |                                               |                                               |                                              |                                               |                                               |
|----------------------------------------------|---------------------------------------------|-----------------------------------------------|-----------------------------------------------|-----------------------------------------------|----------------------------------------------|-----------------------------------------------|-----------------------------------------------|
| <input checked="" type="checkbox"/> T3R_Q6   | <input checked="" type="checkbox"/> TAACC_B | <input checked="" type="checkbox"/> TAL1ALPHA | <input checked="" type="checkbox"/> TAL1BETA4 | <input checked="" type="checkbox"/> TAL1BETA1 | <input checked="" type="checkbox"/> TAL1_Q6  | <input checked="" type="checkbox"/> TATA      | <input checked="" type="checkbox"/> TATA_C    |
| <input checked="" type="checkbox"/> TAXCREB  | <input checked="" type="checkbox"/> TBP     | <input checked="" type="checkbox"/> TBP_Q6    | <input checked="" type="checkbox"/> TBX5      | <input checked="" type="checkbox"/> TBX5B     | <input checked="" type="checkbox"/> TBX5_Q5  | <input checked="" type="checkbox"/> TCF11     | <input checked="" type="checkbox"/> TCF11MAFG |
| <input checked="" type="checkbox"/> TCF4_Q5  | <input checked="" type="checkbox"/> TEF1_Q6 | <input checked="" type="checkbox"/> TEF_Q6    | <input checked="" type="checkbox"/> TEL2_Q6   | <input checked="" type="checkbox"/> TFE_Q6    | <input checked="" type="checkbox"/> TFIIA_Q6 | <input checked="" type="checkbox"/> TFIIIL_Q6 | <input checked="" type="checkbox"/> TGIF      |
| <input checked="" type="checkbox"/> TITF1_Q3 | <input checked="" type="checkbox"/> TST1    | <input checked="" type="checkbox"/> TTF1_Q6   |                                               |                                               |                                              |                                               |                                               |

U .. V .. W .. X

|                                             |                                             |                                           |                                            |                                          |                                            |                                            |                                          |
|---------------------------------------------|---------------------------------------------|-------------------------------------------|--------------------------------------------|------------------------------------------|--------------------------------------------|--------------------------------------------|------------------------------------------|
| <input checked="" type="checkbox"/> USF     | <input checked="" type="checkbox"/> USF2_Q6 | <input checked="" type="checkbox"/> USF_C | <input checked="" type="checkbox"/> USF_Q6 | <input checked="" type="checkbox"/> VBP  | <input checked="" type="checkbox"/> VDR_Q3 | <input checked="" type="checkbox"/> VDR_Q6 | <input checked="" type="checkbox"/> VJUN |
| <input checked="" type="checkbox"/> VMAF    | <input checked="" type="checkbox"/> VMYB    | <input checked="" type="checkbox"/> WHN_B | <input checked="" type="checkbox"/> WT1_Q6 | <input checked="" type="checkbox"/> XBP1 | <input checked="" type="checkbox"/> XFD1   | <input checked="" type="checkbox"/> XFD2   | <input checked="" type="checkbox"/> XFD3 |
| <input checked="" type="checkbox"/> XPF1_Q6 | <input checked="" type="checkbox"/> XVENT1  |                                           |                                            |                                          |                                            |                                            |                                          |

Y .. Z

|                                            |                                            |                                            |                                         |                                           |                                          |                                          |                                          |
|--------------------------------------------|--------------------------------------------|--------------------------------------------|-----------------------------------------|-------------------------------------------|------------------------------------------|------------------------------------------|------------------------------------------|
| <input checked="" type="checkbox"/> YY1_Q6 | <input checked="" type="checkbox"/> ZBRK1  | <input checked="" type="checkbox"/> ZEC    | <input checked="" type="checkbox"/> ZF5 | <input checked="" type="checkbox"/> ZF5_B | <input checked="" type="checkbox"/> ZIC1 | <input checked="" type="checkbox"/> ZIC2 | <input checked="" type="checkbox"/> ZIC3 |
| <input checked="" type="checkbox"/> ZID    | <input checked="" type="checkbox"/> ZNF219 | <input checked="" type="checkbox"/> ZTA_Q2 |                                         |                                           |                                          |                                          |                                          |

TBX5 and NKX2.5 are high-quality matrices created by Benoit Bruneau and Jochi Aronowicz

**SELECT ALL** **RESET** **SUBMIT**

**MULTiTF**

Figure 7

9. Press “**CHECK IT**” (Figure 8).

**MULTiTF** **SUBMISSION RESULT**

Data was successfully submitted for the multiTF processing and added to the queue  
Reference index is mlr1119202409561725

**CHECK IT**

**MULTiTF**

Figure 8

10. Once the analysis is complete, the system generates the results. To view the list of predicted TFBS, click the link in the “**Summary**” section (highlighted in orange, Figure 9). The summary includes the transcription factor name, binding site sequence, DNA strand orientation, and genomic position (Figure 10).

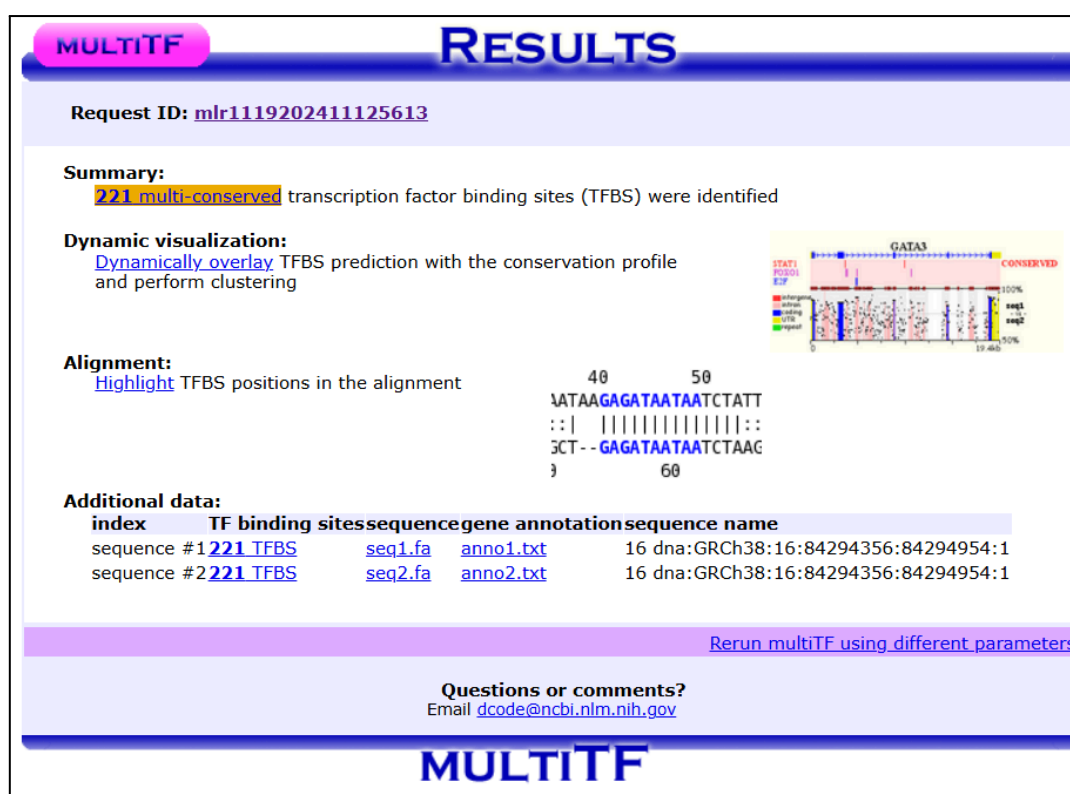

Figure 9

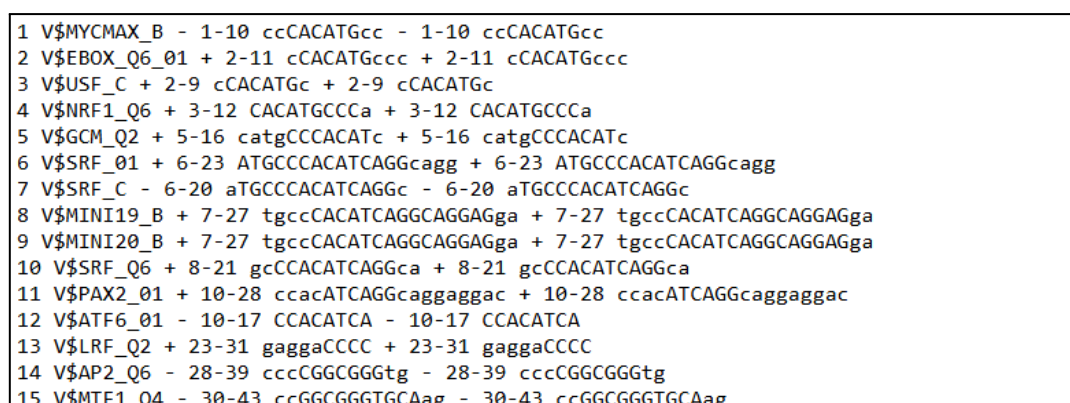

Figure 10

11. Additional information, such as the conservation profile of TFBS across species (if multiple species were analyzed), can be accessed on the Results page by using the “**Dynamically overlay**” feature (Figure 11).

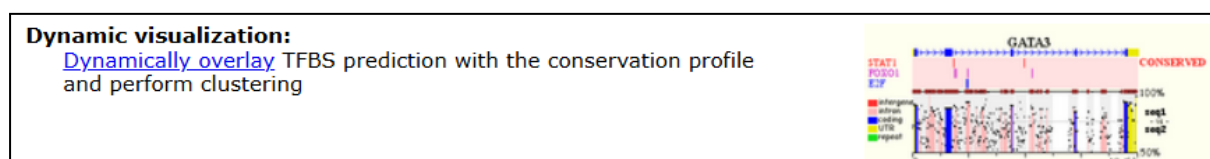

Figure 11
