# Supplementary material for: Genetic Mechanisms Shaping the Evolution of an Ancient Myostatin Promoter/enhancer Across Bony Vertebrates
Source: Research Square preprint supplement (doi:10.21203/rs.3.rs-6733976/v1), 2025-07-23
Supplement: Supplementary file 3 [file d83609371509442c6759ba73.xlsx]

## Sheet: Table S2
Supplementary Table S2. List of all species employed in our work, including MSTN Gene ID and promoter size.
CLADES				Species	MSTN			Size (bp)
					Strand	NCBI	Ensembl	Proximal
						Gene ID	Gene ID	Promoter
CARTILAGINOUS FISH				Callorhinchus milii	-	103176533	---	---
ACTINOPTERYGII	HOLOSTEI			Lepisosteus oculatus	-	102695605	ENSLOCG00000008826	116
	TELEOSTEI			Danio rerio	+	798441	ENSDARG00000069133	78
				Gadus morhua	+	115533060	ENSGMOG00000012639	78
				Gasterosteus aculeatus	+	120834110	ENSGACG00000002630	75
				Tetraodon nigroviridis	+	---	ENSTNIG00000015714	75
				Takifugu rubripes	-	446041	ENSTRUG00000012935	75
				Oreochromis niloticus	-	100711890	ENSONIG00000007163	75
				Oryzias latipes	+	100529165	ENSORLG00000015057	68
				Poecilia formosa	-	103138120	ENSPFOG00000021946	75
SARCOPTERYGII	COELACANTHIFORMES			Latimeria chalumnae	-	102350883	ENSLACG00000015109	104
	TETRAPODA	AMPHIBIA		Xenopus tropicalis	+	100496408	ENSXETG00000048016	92
		SAUROPSIDA	SQUAMATA	Gekko japonicus	+	107105584	---	253
				Anolis carolinensis	+	100557219	ENSACAG00000004208	236
				Python bivittatus	+	103059251	---	252
				Protobothrops mucrosquamatus	-	107288508	---	246
				Thamnophis sirtalis	-	106543639	---	253
			TESTUDINES	Pelodiscus sinensis	+	102448934	ENSPSIG00000013093	254
				Chrysemys picta	-	101946550	ENSCPBG00000020484	254
				Chelonia mydas	+	102936316	---	254
			CROCODYLIA	Alligator sinensis	+	102377521	---	252
				Alligator mississippiensis	+	102566354	---	252
			AVES	Struthio camelus australis	-	104143397	ENSSCUG00000010933	251
				Anas platyrhynchos	-	101800742	ENSAPLG00020015160	253
				Meleagris gallopavo	-	100303659	ENSMGAG00000006288	253
				Gallus gallus	+	373964	ENSGALG00010012852	253
				Caprimulgus carolinensis%	-	104532241	---	255
				Calypte anna	-	103531311	---	255
				Chaetura pelagica	-	104386609	---	255
				Columba livia	+	110358280	---	252
				Aptenodytes forsteri	-	103897142	---	252
				Pygoscelis adeliae	+	103925477	---	252
				Pelecanus crispus	-	104031772	---	252
				Colius striatus	+	104559867	---	255
				Ficedula albicollis	-	101813426	ENSTGUG00000010861	254
				Taeniopygia guttata	+	100230965	ENSFALG00000004398	254
		MAMMALIA	MARSUPIALIA	Phascolarctos cinereus	-	110213344	ENSPCIG00000003035	261
				Monodelphis domestica	-	100021378	ENSMODG00000011550	261
				Sarcophilus harrisii	-	100932090	ENSSHAG00000014173	261
			XENARTHRA	Dasypus novemcinctus	-	101428833	ENSDNOG00000036933	260
			AFROTHERIA	Loxodonta africana	+	100669544	ENSLAFG00000016038	261
				Elephantulus edwardii	+	102877029	---	261
				Chrysochloris asiatica	-	102841846	---	261
				Echinops telfairi	-	101648240	ENSETEG00000018924	261
			EULIPOTYPHLA	Erinaceus europaeus	-	103118793	ENSEEUG00000006838	255
				Sorex araneus	-	101553389	ENSSARG00000013510	259
			PERISSODACTYLA	Equus caballus	-	100033832	ENSECAG00000021373	259
				Equus asinus	+	106828810	ENSEASG00005021043	259
			CARNIVORA	Actionyx jubatus	+	106979740	---	260
				Felis catus	-	101081322	ENSFCAG00000029333	260
				Canis lupus familiaris	-	403433	ENSCAFG00845024446	260
				Ursus maritimus	-	103659674	ENSUMAG00000019124	260
				Ailuropoda melanoleuca	-	100472102	ENSAMEG00000012311	260
				Mustela putorius furo	-	101678297	ENSMPUG00000012407	260
				Odobenus rosmarus	-	101375693	---	260
				Leptonychotes weddellii	-	102728862	---	260
			CHIROPTERA	Rousettus aegyptiacus	+	107512142	---	260
				Pteropus alecto	-	102884693	---	260
				Pteropus vampyrus	-	105289413	ENSPVAG00000017162	260
				Hipposideros armiger	-	109372946	ENSHARG00000015837	260
				Rhinolophus sinicus	-	109452050	---	260
				Miniopterus natalensis	-	107539090	---	260
				Eptesicus fuscus	+	103290574	---	256
				Myotis davidii	-	102755672	---	259
				Myotis lucifugus	+	102432027	ENSMLUG00000026762	258
			CETARTIODACTYLA	Vicugna pacos	+	102533116	ENSVPAG00000004552	259
				Camelus ferus	+	102503936	ENSCFEG00005000046	259
				Sus scrofa	-	399534	ENSSSCG00000016047	258
				Ovis aries	+	443449	ENSOARG00000016285	259
				Bos taurus	+	281187	ENSBTAG00000011808	259
				Bison bison	+	105005049	ENSBBBG00000006056	259
				Balaenoptera acutorostrata	+	103017701	---	260
				Physeter catodon	-	102983602	ENSPCTG00005018647	260
				Tursiops truncatus	+	101329562	ENSTTRG00000013877	260
				Orcinus orca	-	101270228	ENSOORG00010011736	260
			LAGOMORPHA	Ochotona princeps	-	101530895	ENSOPRG00000012213	258
				Oryctolagus cuniculus	-	100125998	ENSOCUG00000012663	260
			RODENTIA	Cavia porcellus	+	100735599	ENSCPOG00000031988	260
				Ictidomys tridecemlineatus	+	101955583	ENSSTOG00000001347	260
				Marmota marmota	-	107138544	ENSMMMG00000009361	260
				Jaculus jaculus	+	101595056	ENSJJAG00000016346	260
				Rattus norvegicus	-	29152	ENSRNOG00000021294	260
				Mus musculus	+	17700	ENSMUSG00000026100	260
				Peromyscus maniculatus bairdii	-	102911880	ENSPEMG00000013416	260
				Mesocricetus auratus	-	101826137	ENSMAUG00000000636	260
				Cricetulus griseus	+	100770972	ENSCGRG00015028740	260
			PRIMATES	Otolemur garnettii	-	100960227	ENSOGAG00000013039	259
				Microcebus murinus	+	105877891	ENSMICG00000010487	260
				Carlito syrichta	+	103268172	ENSTSYG00000006154	260
				Callithrix jacchus	+	100398953	ENSCJAG00000005664	260
				Chlorocebus sabaeus	-	103217519	ENSCSAG00000012272	260
				Papio anubis	-	101003199	ENSPANG00000017761	260
				Macaca mulatta	-	710114	ENSMMUG00000014307	260
				Nomascus leucogenys	-	100593244	ENSNLEG00000006642	260
				Pongo abelii	-	100461320	ENSPPYG00000039942	260
				Gorilla gorilla	-	101135255	ENSGGOG00000027833	260
				Pan troglodytes	-	470605	ENSPTRG00000012738	260
				Homo sapiens	-	2660	ENSG00000138379	260
Code	Meaning
---	No information available.
%	Also known as Antrostomus carolinensis.
References:
Liu S, Lorenzen ED, Fumagalli M, Li B, Harris K, Xiong Z, Zhou L, Korneliussen TS, Somel M, Babbitt C, et al. 2014. Population genomics reveal recent speciation and rapid evolutionary adaptation in polar bears. Cell 157:785–794.
