# Supplementary material for: Genetic Mechanisms Shaping the Evolution of an Ancient Myostatin Promoter/enhancer Across Bony Vertebrates
Source: Research Square preprint supplement (doi:10.21203/rs.3.rs-6733976/v1), 2025-07-23
Supplement: Supplementary file 4 [file e2bf91d25aa50ccca3f1948f.xlsx]

## Sheet: Table S1
Supplemental Table S1. Primers and vectors used for in situ hybridisation probe generation.
Species	Gene	Primer name	Primer sequence	Fragment Size	Plasmid Source
Mouse	Mstn	Mstn Forward	GGATGACAGCAGTGATGGCT	579 bp	-
Mouse	Mstn	Mstn Reverse	TCAAAATCGACCGTGAGGGG		-
Mouse	Mstn	Mstn Reverse + T7	TAATACGACTCACTATAGGGAGATCAAAATCGACCGTGAGGGG		-
Mouse	Myod	Myod Forward	TACAGTGGCGACTCAGACGC	787 bp	-
Mouse	Myod	Myod Reverse	GAGGGCTCCAGAAAGTGACA		-
Mouse	Myod	Myod Reverse + T7	TAATACGACTCACTATAGGGAGAGAGGGCTCCAGAAAGTGACA		-
Mouse	Alx4	Alx4 Forward	ATTCCCAGGAGGCGACAAGT	728 bp	-
Mouse	Alx4	Alx4 Reverse	ACTCATAGGCCGTGGAGAAGT		-
Mouse	Alx4	Alx4 Reverse + T7	TAATACGACTCACTATAGGGAGAACTCATAGGCCGTGGAGAAGT		-
Chicken	MSTN	M13 Forward	TGTAAAACGACGGCCAGT	427 bp	Castelhano-Barbosa et al. 2005
Chicken	MSTN	M13 Reverse	CAGGAAACAGCTATGAC		Castelhano-Barbosa et al. 2005
Chicken	MYOD	M13 Forward	TGTAAAACGACGGCCAGT	909 bp	Berti et al. 2015
Chicken	MYOD	M13 Reverse	CAGGAAACAGCTATGAC		Berti et al. 2015
Chicken	ALX4	M13 Forward	TGTAAAACGACGGCCAGT	1.245 bp	Takahashi et al.1998
Chicken	ALX4	M13 Reverse	CAGGAAACAGCTATGAC		Takahashi et al. 1998
