# Supplementary material for: Genetic Mechanisms Shaping the Evolution of an Ancient Myostatin Promoter/enhancer Across Bony Vertebrates
Source: Research Square preprint supplement (doi:10.21203/rs.3.rs-6733976/v1), 2025-07-23
Supplement: Supplementary file 5 [file f1509d8e94fe3c9a4b0f6727.xlsx]

## Sheet: Table 5S
Supplemental Table S5. List of TFBS overlapping with PAX8 site and its corresponding protein in sauropsids and mammals.
Pax8 module		Sauropsida*				Mammalia*
Binding site	Mapped protein	Squamata	Crocodylia	Testudines	Aves	Marsupialia	Rodentia	Primates
		G. japonicus	A. mississippiensis	P. sinensis	G. gallus	M. domestica	M. musculus	H. sapiens
AP1	JUN					JUN	JUN	JUN
BRACH (T)	TBXT		TBXT	TBXT
ER	ESR1		ESR1	**		ESR1		ESR1
ER	ESR2		ESR2	**		ESR2		ESR2
GATA1	GATA1			GATA1
GFl	GFI1B		GFI1B	GFI1B	GFI1B
GFl1B	GFI1B		GFI1B	GFI1B
GFI1	GFI1B
HNF4	HNF4A		HNF4	HNF4	HNF4
NFE2	NFE2					NFE2	NFE2	NFE2
NF1	NF1				NF1
NRF2	GABPA					GABPA	GABPA	GABPA
PAX2	PAX2					PAX2		PAX2
PAX6	PAX6		PAX6	PAX6	PAX6
PAX8	PAX8	PAX8	PAX8	PAX8	PAX8	PAX8		PAX8
ROAZ	ZNF423	ZNF423	ZNF423	ZNF423	ZNF423	ZNF423		ZNF423
T3R	THRA					THRA		THRA
T3R	THRB					THRB		THRB
TITF1	NKX2-1					NKX2-1		NKX2-1
* We chose a single representative species of each clade to perform the TFBS analysis of the PAX8 module.
** Out of three turtle species only one posses the ER site (C. mydas).
