# Supplementary material for: Genetic Mechanisms Shaping the Evolution of an Ancient Myostatin Promoter/enhancer Across Bony Vertebrates
Source: Research Square preprint supplement (doi:10.21203/rs.3.rs-6733976/v1), 2025-07-23
Supplement: Supplementary file 6 [file f5b3343eb569f59cfaaf01e7.xlsx]

## Sheet: Table S4A
Supplementary Table 4A. Sequence alignment of MSTN promoters indicating the position of main TFBS.
			Consensus sequence	C	T	T	T	C	A	T	T	A	T	T	T	G	T	A	G	A	T	T	T	A	T	T	T	C	T	T	T	T	A	T	G	A	A	G	T	A	G	T	C	A	A	A	T	G	A
		Group	Species	1	2	3	4	5	6	7	8	9	10	11	12	13	14	15	16	17	18	19	20	21	22	23	24	25	26	27	28	29	30	31	32	33	34	35	36	37	38	39	40	41	42	43	44	45	46
		Holostei	L.oculatus	-	-	-	-	-	-	-	-	-	-	-	-	-	-	-	-	-	-	-	-	-	-	-	-	-	-	-	-	-	-	-	-	-	-	-	-	-	-	-	-	-	-	-	-	-	-
		Teleostei	D.rerio	-	-	-	-	-	-	-	-	-	-	-	-	-	-	-	-	-	-	-	-	-	-	-	-	-	-	-	-	-	-	-	-	-	-	-	-	-	-	-	-	-	-	-	-	-	-
			G.morhua	-	-	-	-	-	-	-	-	-	-	-	-	-	-	-	-	-	-	-	-	-	-	-	-	-	-	-	-	-	-	-	-	-	-	-	-	-	-	-	-	-	-	-	-	-	-
			G.aculeatus	-	-	-	-	-	-	-	-	-	-	-	-	-	-	-	-	-	-	-	-	-	-	-	-	-	-	-	-	-	-	-	-	-	-	-	-	-	-	-	-	-	-	-	-	-	-
			T.nigroviridis	-	-	-	-	-	-	-	-	-	-	-	-	-	-	-	-	-	-	-	-	-	-	-	-	-	-	-	-	-	-	-	-	-	-	-	-	-	-	-	-	-	-	-	-	-	-
			T.rubripes	-	-	-	-	-	-	-	-	-	-	-	-	-	-	-	-	-	-	-	-	-	-	-	-	-	-	-	-	-	-	-	-	-	-	-	-	-	-	-	-	-	-	-	-	-	-
			O.niloticus	-	-	-	-	-	-	-	-	-	-	-	-	-	-	-	-	-	-	-	-	-	-	-	-	-	-	-	-	-	-	-	-	-	-	-	-	-	-	-	-	-	-	-	-	-	-
			O.latipes	-	-	-	-	-	-	-	-	-	-	-	-	-	-	-	-	-	-	-	-	-	-	-	-	-	-	-	-	-	-	-	-	-	-	-	-	-	-	-	-	-	-	-	-	-	-
			P.formosa	-	-	-	-	-	-	-	-	-	-	-	-	-	-	-	-	-	-	-	-	-	-	-	-	-	-	-	-	-	-	-	-	-	-	-	-	-	-	-	-	-	-	-	-	-	-
			L.chalumnae	-	-	-	-	-	-	-	-	-	-	-	-	-	-	-	-	-	-	-	-	-	-	-	-	-	-	-	-	-	-	-	-	-	-	-	-	-	-	-	-	-	-	-	-	-	-
			X.tropicalis	-	-	-	-	-	-	-	-	-	-	-	-	-	-	-	-	-	-	-	-	-	-	-	-	-	-	-	-	-	-	-	-	-	-	-	-	-	-	-	-	-	-	-	-	-	-
		Squamata	G.japonicus	C	T	T	T	C	A	G	C	A	T	-	-	G	T	G	A	G	G	A	G	A	T	A	C	C	C	T	C	C	G	T	G	G	A	A	T	A	G	C	C	A	G	-	-	A	A
			A.carolinensis	A	T	T	T	C	A	G	C	A	T	-	-	G	T	G	A	G	G	A	G	A	T	A	C	C	C	T	C	G	A	T	G	G	A	A	C	A	G	T	C	A	G	A	-	A	T
			P.bivittatus	T	T	T	T	C	A	G	C	A	T	-	-	G	T	G	A	G	C	A	G	A	T	A	C	T	C	T	C	T	A	T	G	G	A	A	T	A	A	T	C	A	G	C	-	A	A
			P.mucrosquamatus	T	T	T	T	C	A	G	C	A	T	-	-	G	T	G	A	G	C	A	G	A	T	A	C	T	C	T	C	T	A	T	G	G	A	A	T	A	A	T	A	A	G	C	-	A	A
			T.sirtalis	T	T	T	T	C	A	G	C	A	T	-	-	G	T	G	A	G	C	A	G	A	T	A	C	T	C	T	C	T	A	A	G	G	A	A	T	A	A	T	A	A	G	C	-	A	A
		Testudines	P.sinensis	T	C	T	C	C	A	G	T	A	T	-	-	G	T	G	A	G	G	A	G	A	T	A	T	C	C	T	C	T	A	C	A	G	A	G	T	G	G	T	C	A	G	A	T	A	A
			C.picta	T	C	T	T	C	A	G	T	A	T	-	-	G	T	G	A	G	G	A	G	A	T	A	T	C	T	T	C	T	A	C	A	G	A	G	T	G	G	T	C	A	G	A	T	A	A
			C.mydas	T	C	T	T	C	A	G	T	A	T	-	-	G	T	G	A	G	G	A	G	A	T	A	T	C	C	T	C	T	A	C	A	G	A	G	T	G	G	T	C	A	G	A	T	A	A
		Crocodylia	A.sinensis	C	T	C	T	C	A	G	T	A	C	-	-	A	C	G	A	A	G	A	G	A	T	A	T	G	C	T	C	T	A	T	G	G	A	G	C	G	T	C	C	A	G	A	T	A	A
			A.mississippiensis	C	T	C	T	C	A	G	T	A	C	-	-	A	C	G	A	A	G	A	G	A	T	A	T	G	C	T	C	T	A	T	G	G	A	G	C	G	T	C	C	A	G	A	T	A	A
		Aves	S.camelus	C	T	T	T	C	A	G	T	A	T	-	-	G	T	G	A	A	G	G	C	A	T	A	T	C	C	T	C	T	A	T	G	A	A	G	T	G	A	C	C	A	G	A	T	A	A
			A.platyrhynchos	C	T	T	T	C	C	G	T	A	T	-	-	G	T	G	A	A	G	A	C	A	T	A	T	C	C	T	C	T	A	T	G	A	A	G	C	C	A	C	C	A	G	A	T	A	A
			M.gallopavo	C	T	T	T	C	A	G	T	A	T	-	-	G	T	G	A	A	G	A	C	G	T	A	T	C	C	T	C	T	A	T	G	A	A	A	C	C	A	C	C	A	G	A	T	A	A
			G.gallus	C	T	T	T	C	A	G	T	A	T	-	-	G	T	G	A	A	G	A	C	G	T	A	T	C	C	T	C	T	A	C	G	A	A	G	C	C	A	C	C	A	G	A	T	A	A
			C.carolinensis	C	T	T	T	C	A	C	T	A	T	-	-	G	C	A	A	A	A	A	C	A	T	A	T	C	C	T	C	A	A	C	A	A	A	G	C	A	C	C	C	A	G	A	T	A	A
			C.anna	C	T	T	T	C	A	G	T	A	T	-	-	G	C	A	A	A	G	G	C	A	T	A	T	C	C	T	C	A	G	C	A	A	A	G	C	A	C	C	C	T	G	A	T	A	A
			C.pelagica	C	T	T	T	C	A	G	T	A	T	-	-	G	C	A	A	A	G	G	C	A	T	A	T	C	C	T	C	A	A	C	A	A	A	G	T	G	C	C	C	A	G	A	T	A	A
			C.livia	C	T	T	T	C	A	G	T	A	T	-	-	G	C	G	A	A	G	A	C	A	T	A	T	C	C	T	C	T	A	C	G	A	A	G	C	A	C	T	C	A	G	A	T	A	A
			A.forsteri	C	T	T	T	C	A	G	T	A	T	-	-	G	C	G	A	A	G	A	C	A	T	A	T	C	C	T	C	T	A	A	G	A	A	G	C	G	C	C	C	A	G	A	T	A	A
			P.adeliae	C	T	T	T	C	A	G	T	A	T	-	-	G	C	G	A	A	G	A	C	A	T	A	T	C	C	T	C	T	A	C	G	A	A	G	C	G	C	C	C	A	G	A	T	A	A
			P.crispus	C	T	T	T	C	A	G	T	A	T	-	-	G	C	A	A	A	G	A	C	A	T	A	T	C	C	T	C	T	A	T	G	A	C	G	C	G	T	C	C	A	G	A	T	A	A
			C.striatus	C	T	T	T	C	A	G	T	A	T	-	-	G	C	A	A	A	G	A	C	A	T	A	T	C	C	T	C	T	G	T	G	A	A	G	C	A	C	C	C	A	G	T	T	A	A
			F.albicollis	C	T	T	A	G	A	G	A	A	T	-	-	G	T	G	A	A	G	G	C	A	T	A	T	C	C	T	C	T	G	A	G	A	A	G	C	A	C	C	C	A	G	A	T	A	A
			T.guttata	C	T	T	T	C	A	G	A	A	T	-	-	G	T	G	A	A	G	G	C	A	T	A	T	C	C	T	C	T	G	T	G	A	A	G	T	A	C	C	C	A	G	A	T	A	A
		Marsupialia	P.cinereus	C	T	T	T	C	A	C	T	A	T	T	T	G	C	A	G	A	T	T	T	A	T	T	T	G	T	T	T	T	A	T	G	A	A	G	T	G	G	T	C	A	A	A	T	G	A
			M.domestica	C	T	T	T	C	A	T	T	A	T	T	T	G	T	A	G	A	T	T	T	A	T	T	T	C	T	T	T	T	A	T	G	A	A	G	T	G	G	T	C	A	A	A	T	G	A
			S.harrisii	C	T	T	T	C	A	C	T	A	T	T	T	A	C	A	G	A	T	T	T	A	T	T	T	C	T	T	T	T	A	T	A	A	A	G	T	G	G	T	C	A	A	A	T	G	A
			D.novemcinctus	C	T	T	G	C	A	T	T	A	T	T	T	G	T	A	G	A	T	T	T	A	T	T	T	C	T	T	T	C	A	T	G	A	A	G	A	A	G	T	C	A	A	A	T	G	A
		Afrotheria	L.africana	C	T	T	T	C	A	T	T	A	T	T	T	G	T	A	G	A	T	T	T	A	T	T	T	C	T	T	T	A	A	T	G	G	A	G	T	A	G	G	C	A	A	A	T	G	A
			E.edwardii	C	T	T	T	C	A	T	T	A	T	T	T	G	T	G	G	A	T	T	T	A	T	T	T	C	T	T	T	T	A	T	G	G	A	G	T	A	G	T	C	A	A	A	T	G	A
			E.telfairi	C	T	T	T	C	A	T	T	A	T	T	T	G	T	A	G	G	C	T	T	A	T	T	T	T	T	T	T	T	A	T	G	G	A	G	T	A	G	T	C	C	A	A	T	G	A
			C.asiatica	C	T	T	T	C	A	T	T	A	T	T	T	G	T	A	G	A	T	T	T	A	T	T	T	C	T	T	T	T	A	T	G	G	A	G	T	A	G	T	C	A	A	A	T	G	A
			E.europaeus	T	T	C	T	C	A	T	G	A	T	C	T	G	T	A	G	A	C	T	T	A	T	T	T	C	T	T	T	T	A	T	G	A	A	G	C	A	A	T	C	A	A	A	T	G	A
			S.araneus	C	T	T	T	C	A	T	T	A	T	T	T	G	C	A	G	A	T	T	T	A	T	T	T	C	T	T	T	T	A	T	A	A	A	G	T	G	G	T	C	A	A	A	T	G	A
			E.caballus	C	T	T	T	C	-	T	T	A	T	T	T	A	T	A	G	A	T	T	T	A	T	T	T	C	T	T	T	T	A	T	G	A	A	G	T	A	G	T	C	A	A	A	T	G	A
			E.asinus	C	T	T	T	C	-	T	T	A	T	T	T	A	T	A	G	A	T	T	T	A	T	T	T	C	T	T	T	T	A	T	G	A	A	G	T	A	G	T	C	A	A	A	T	G	A
		Carnivora	A.jubatus	C	T	T	T	C	A	T	T	A	T	T	T	G	T	A	G	A	T	T	T	A	T	T	T	C	T	T	T	T	A	T	G	A	A	G	T	A	G	T	C	G	A	A	T	G	A
			F.catus	C	T	T	T	C	A	T	T	A	T	T	T	G	T	A	G	A	T	T	T	A	T	T	T	C	T	T	T	T	A	T	G	A	A	G	T	A	G	T	C	G	A	A	T	G	A
			C.familiaris	C	T	T	T	C	A	T	T	A	T	T	T	G	C	G	G	A	T	T	T	A	T	T	T	C	C	T	T	T	A	T	G	A	A	G	T	A	G	T	C	G	A	A	T	G	A
			U.maritimus	C	T	T	T	C	A	T	T	A	T	T	T	G	T	A	G	A	T	T	T	A	T	T	T	C	T	T	T	T	A	T	G	A	A	G	T	A	G	T	A	G	A	A	T	G	A
			A.melanoleuca	C	T	T	T	C	A	T	T	A	T	T	T	G	T	A	G	A	T	T	T	A	T	T	T	C	T	T	T	T	A	T	G	A	A	G	T	A	G	T	C	G	A	A	T	G	A
			M.putorius	C	T	T	T	C	A	T	T	A	T	T	T	G	T	A	G	A	T	T	T	A	T	T	T	C	T	T	T	T	A	T	G	A	A	G	T	A	G	T	C	G	A	A	T	G	A
			O.rosmarus	C	T	T	T	C	A	T	T	A	T	T	T	G	T	A	G	A	T	T	T	T	T	T	T	T	T	T	T	T	A	T	G	A	A	G	T	A	G	T	C	A	A	A	T	G	A
			L.weddellii	C	T	T	T	C	A	T	T	A	T	T	T	G	T	C	G	A	T	T	T	A	T	T	T	T	T	T	T	T	A	T	G	A	A	G	T	A	G	T	C	G	A	A	T	G	A
		Chiroptera	R.aegyptiacus	C	T	T	T	C	A	T	T	A	T	T	T	G	T	A	G	A	T	T	T	A	T	T	T	C	T	T	T	T	A	T	G	A	A	G	T	A	C	T	C	A	A	A	T	G	A
			P.alecto	C	T	T	T	C	A	T	T	A	T	T	T	G	T	A	G	A	T	T	T	A	T	T	T	C	T	T	T	T	A	T	G	A	A	G	T	A	C	T	C	A	A	A	T	G	A
			P.vampyrus	C	T	T	T	C	A	T	T	A	T	T	T	G	T	A	G	A	T	T	T	A	T	T	T	C	T	T	T	T	A	T	G	A	A	G	T	A	C	T	C	A	A	A	T	G	A
			H.armiger	C	T	T	T	C	A	T	T	A	T	T	T	G	C	A	G	A	T	T	T	A	T	T	T	C	T	T	T	T	A	T	G	A	A	G	T	A	C	T	C	A	A	A	T	G	A
			R.sinicus	C	T	T	T	C	A	T	T	A	T	T	T	G	T	A	G	A	T	T	T	A	T	T	T	C	T	T	T	T	A	T	G	A	A	G	T	A	C	T	C	A	A	A	T	G	A
			M.natalensis	C	T	T	T	C	A	T	T	C	T	T	T	G	T	A	G	G	T	T	T	C	T	T	T	C	T	T	T	T	A	T	G	A	A	A	T	A	C	T	C	A	A	A	T	G	A
			E.fuscus	C	T	C	G	C	C	C	G	A	T	C	T	G	C	A	G	A	T	T	T	C	T	T	T	C	T	T	T	T	A	T	G	A	A	G	C	G	C	T	C	A	G	A	T	G	C
			M.davidii	C	T	C	C	G	C	T	G	A	T	C	T	G	T	A	G	A	T	T	T	C	T	T	T	C	T	T	T	T	A	T	G	A	A	G	C	A	T	G	C	A	G	A	T	G	C
			M.lucifugus	C	T	C	C	C	C	T	G	A	T	T	T	G	T	A	G	A	T	T	T	A	T	T	T	C	T	T	T	T	A	T	G	A	A	G	C	A	C	T	C	A	G	A	T	G	C
		Cetartiodactyla	V.pacos	T	T	T	T	-	A	T	T	A	T	T	T	G	T	A	G	A	T	T	T	A	T	T	T	C	T	T	T	T	A	T	G	A	A	G	T	A	G	T	C	A	A	A	T	G	A
			C.ferus	T	T	T	-	C	A	T	T	A	T	T	T	G	T	A	G	A	T	T	T	A	T	T	T	C	T	T	T	T	A	T	G	A	A	G	T	A	G	T	C	A	A	A	T	G	A
			S.scrofa	C	T	T	T	C	A	T	T	A	T	T	T	G	T	A	G	A	T	T	T	A	T	T	T	C	T	T	T	T	A	T	G	A	A	G	T	A	G	T	C	A	A	A	T	G	A
			O.aries	C	T	T	T	-	A	T	T	A	T	T	C	A	T	A	G	A	T	T	T	A	T	T	C	C	T	T	T	T	A	A	G	A	A	G	T	A	G	T	C	A	A	A	T	G	A
			B.taurus	C	T	T	T	-	A	T	T	A	T	T	C	A	T	A	G	A	T	T	T	A	T	T	C	C	T	T	T	T	A	A	G	A	A	G	T	A	G	T	C	A	A	A	T	G	A
			B.bison	C	T	T	T	-	A	T	T	A	T	T	C	A	T	A	G	A	T	T	T	A	T	T	C	C	T	T	T	T	A	A	G	A	A	G	T	A	G	T	C	A	A	A	T	G	A
			B.acutorostrata	C	T	T	T	C	A	T	T	A	T	T	T	G	T	A	G	A	T	T	T	A	T	T	T	C	T	T	T	T	A	T	G	A	A	G	T	A	G	T	C	A	A	A	T	G	A
			P.catodon	C	T	T	T	C	A	T	T	A	T	T	T	G	T	A	G	A	T	T	T	A	T	T	T	C	T	T	T	T	A	T	G	A	A	G	T	A	G	T	C	A	A	A	T	G	A
			T.truncatus	C	G	T	T	C	A	T	T	A	T	T	T	G	T	A	G	A	T	T	T	A	T	T	T	C	T	T	T	T	A	T	G	A	A	G	T	A	G	T	C	A	A	A	T	G	A
			O.orca	C	T	T	T	C	A	T	T	A	T	T	T	G	T	A	G	A	T	T	T	A	T	T	T	C	T	T	T	T	A	T	G	A	A	G	T	A	G	T	C	A	A	A	T	G	A
			O.princeps	C	T	T	T	C	A	T	T	A	T	T	T	G	C	A	G	A	T	T	T	A	T	T	T	C	T	T	T	T	A	T	G	A	A	C	T	A	G	T	C	A	A	A	T	G	A
			O.cuniculus	C	T	T	T	C	A	T	T	A	T	T	T	G	T	A	G	A	T	T	T	C	T	T	T	C	T	T	T	T	A	T	G	A	A	C	T	A	G	T	C	A	A	A	T	G	A
		Rodentia	C.porcellus	C	T	T	T	C	A	T	T	A	T	T	T	G	T	G	G	A	T	T	T	A	T	T	T	C	T	T	C	T	A	T	G	A	A	G	T	A	G	T	C	A	A	A	T	G	A
			I.tridecemlineatus	C	T	T	T	C	G	T	T	A	T	T	T	G	T	G	G	A	T	T	T	A	T	T	T	C	T	T	T	T	A	T	G	A	A	G	T	A	G	T	C	A	A	A	T	G	A
			M.marmota	C	T	T	T	C	A	T	T	A	T	T	T	G	T	G	G	A	T	T	T	A	T	T	T	C	T	T	T	T	A	T	G	A	A	G	T	A	G	T	C	A	A	A	T	G	A
			J.jaculus	C	T	T	T	C	A	T	G	A	T	T	T	G	G	G	G	A	T	T	T	A	T	T	T	C	T	T	T	T	C	T	G	A	A	G	T	G	G	T	C	A	A	A	T	G	A
			R.norvegicus	C	T	T	T	C	A	T	G	A	T	T	T	G	G	G	G	A	T	T	T	A	T	T	T	C	A	T	G	T	A	T	G	A	A	G	T	A	G	T	C	A	A	A	T	G	A
			M.musculus	C	T	T	T	C	A	T	G	A	T	T	T	G	G	G	G	A	T	T	T	A	T	T	T	C	A	T	T	T	A	T	G	A	A	G	T	A	G	T	C	A	A	A	T	G	A
			P.maniculatus	C	T	T	T	C	A	C	G	A	T	A	T	G	G	G	G	A	T	T	T	A	T	T	T	C	A	T	T	T	A	T	G	A	A	G	T	A	G	T	C	A	A	A	T	G	A
			C.griseus	A	T	T	T	C	A	T	G	A	T	A	T	G	G	G	G	A	T	T	T	A	T	T	T	C	A	T	T	T	A	T	G	A	A	G	T	A	G	T	C	A	A	A	T	G	A
			M.auratus	A	T	T	T	C	A	T	G	A	T	A	T	G	G	G	G	A	T	T	T	A	T	T	T	C	A	T	T	T	A	T	G	A	A	G	T	A	G	T	C	A	A	A	T	G	A
		Primates	M.murinus	C	T	T	T	T	A	T	T	A	T	T	T	G	T	A	G	A	T	T	T	A	T	T	T	C	T	T	T	T	A	T	G	A	A	G	T	A	G	T	C	A	A	A	T	G	A
			O.garnettii	C	T	T	C	T	A	T	A	A	T	T	T	A	T	A	G	A	T	T	T	A	T	T	C	C	T	T	T	T	A	T	G	A	A	G	T	A	G	T	T	A	A	A	T	G	A
			C.syrichta	C	T	T	C	T	A	G	T	A	T	T	T	G	T	A	G	A	T	T	T	A	T	T	T	A	T	T	T	T	A	T	G	A	A	G	T	A	G	T	C	A	A	A	T	G	A
			C.jacchus	C	T	T	T	T	A	T	T	A	T	T	T	G	T	A	G	A	T	T	T	A	T	T	T	C	T	T	T	T	A	T	G	A	A	G	T	A	G	T	C	A	A	A	T	G	A
			C.sabaeus	C	T	T	T	T	A	T	T	A	T	T	T	G	T	G	G	A	T	T	T	A	T	T	C	C	T	T	T	T	A	T	G	A	A	G	T	A	G	T	C	A	A	A	T	G	A
			P.anubis	C	T	T	T	T	A	T	T	A	T	T	T	G	T	G	G	A	T	T	T	A	T	T	C	C	T	T	T	T	A	T	G	A	A	G	T	A	G	T	C	A	A	A	T	G	A
			M.mulatta	C	T	T	T	T	A	T	T	A	T	T	T	G	T	G	G	A	T	T	T	A	T	T	C	C	T	T	T	T	A	T	G	A	A	G	T	A	G	T	C	A	A	A	T	G	A
			N.leucogenys	C	T	T	T	T	A	T	T	A	T	T	T	G	T	A	G	A	T	T	T	A	T	T	T	C	T	T	T	T	A	T	G	A	A	G	T	A	G	T	C	A	A	A	T	G	A
			P.abelii	C	T	T	T	T	A	T	T	A	T	T	T	G	T	A	G	A	T	T	T	A	T	T	T	C	T	T	T	T	A	T	G	A	A	G	T	A	G	T	C	A	A	A	T	G	A
			G.gorilla	C	T	T	T	T	A	T	T	A	C	T	T	G	T	A	G	A	T	T	T	A	T	T	T	C	T	T	T	T	A	T	G	A	A	G	T	A	G	T	C	A	A	A	T	G	A
			P.troglodytes	C	T	T	T	T	A	T	T	A	T	T	T	G	T	A	G	A	T	T	T	A	T	T	T	C	T	T	T	T	A	T	G	A	A	G	T	A	G	T	C	A	A	A	T	G	A
			H.sapiens	C	T	T	T	T	A	T	T	A	T	T	T	G	T	A	G	A	T	T	T	A	T	T	T	C	T	T	T	T	A	T	G	A	A	G	T	A	G	T	C	A	A	A	T	G	A
																																			PAX4
																																	NFY/ACAAT
				TATA box																								TATA box
																CREB																	CREB
			Consensus sequence	C	T	T	T	C	A	T	T	A	T	T	T	G	T	A	G	A	T	T	T	A	T	T	T	C	T	T	T	T	A	T	G	A	A	G	T	A	G	T	C	A	A	A	T	G	A
		Group	Species	1	2	3	4	5	6	7	8	9	10	11	12	13	14	15	16	17	18	19	20	21	22	23	24	25	26	27	28	29	30	31	32	33	34	35	36	37	38	39	40	41	42	43	44	45	46
		Holostei	L.oculatus	-	-	-	-	-	-	-	-	-	-	-	-	-	-	-	-	-	-	-	-	-	-	-	-	-	-	-	-	-	-	-	-	-	-	-	-	-	-	-	-	-	-	-	-	-	-
		Teleostei	D.rerio	-	-	-	-	-	-	-	-	-	-	-	-	-	-	-	-	-	-	-	-	-	-	-	-	-	-	-	-	-	-	-	-	-	-	-	-	-	-	-	-	-	-	-	-	-	-
			G.morhua	-	-	-	-	-	-	-	-	-	-	-	-	-	-	-	-	-	-	-	-	-	-	-	-	-	-	-	-	-	-	-	-	-	-	-	-	-	-	-	-	-	-	-	-	-	-
			G.aculeatus	-	-	-	-	-	-	-	-	-	-	-	-	-	-	-	-	-	-	-	-	-	-	-	-	-	-	-	-	-	-	-	-	-	-	-	-	-	-	-	-	-	-	-	-	-	-
			T.nigroviridis	-	-	-	-	-	-	-	-	-	-	-	-	-	-	-	-	-	-	-	-	-	-	-	-	-	-	-	-	-	-	-	-	-	-	-	-	-	-	-	-	-	-	-	-	-	-
			T.rubripes	-	-	-	-	-	-	-	-	-	-	-	-	-	-	-	-	-	-	-	-	-	-	-	-	-	-	-	-	-	-	-	-	-	-	-	-	-	-	-	-	-	-	-	-	-	-
			O.niloticus	-	-	-	-	-	-	-	-	-	-	-	-	-	-	-	-	-	-	-	-	-	-	-	-	-	-	-	-	-	-	-	-	-	-	-	-	-	-	-	-	-	-	-	-	-	-
			O.latipes	-	-	-	-	-	-	-	-	-	-	-	-	-	-	-	-	-	-	-	-	-	-	-	-	-	-	-	-	-	-	-	-	-	-	-	-	-	-	-	-	-	-	-	-	-	-
			P.formosa	-	-	-	-	-	-	-	-	-	-	-	-	-	-	-	-	-	-	-	-	-	-	-	-	-	-	-	-	-	-	-	-	-	-	-	-	-	-	-	-	-	-	-	-	-	-
		Coelacanth	L.chalumnae	-	-	-	-	-	-	-	-	-	-	-	-	-	-	-	-	-	-	-	-	-	-	-	-	-	-	-	-	-	-	-	-	-	-	-	-	-	-	-	-	-	-	-	-	-	-
		Amphibia	X.tropicalis	-	-	-	-	-	-	-	-	-	-	-	-	-	-	-	-	-	-	-	-	-	-	-	-	-	-	-	-	-	-	-	-	-	-	-	-	-	-	-	-	-	-	-	-	-	-
"Reptiles"	Sauropsida	Squamata	G.japonicus	.	.	.	.	.	.	G	C	.	.	-	-	.	.	G	A	G	G	A	G	.	.	A	C	.	C	.	C	C	G	.	.	G	.	A	.	.	.	C	.	.	G	-	-	A	.
			A.carolinensis	A	.	.	.	.	.	G	C	.	.	-	-	.	.	G	A	G	G	A	G	.	.	A	C	.	C	.	C	G	.	.	.	G	.	A	C	.	.	.	.	.	G	.	-	A	T
			P.bivittatus	T	.	.	.	.	.	G	C	.	.	-	-	.	.	G	A	G	C	A	G	.	.	A	C	T	C	.	C	.	.	.	.	G	.	A	.	.	A	.	.	.	G	C	-	A	.
			P.mucrosquamatus	T	.	.	.	.	.	G	C	.	.	-	-	.	.	G	A	G	C	A	G	.	.	A	C	T	C	.	C	.	.	.	.	G	.	A	.	.	A	.	A	.	G	C	-	A	.
			T.sirtalis	T	.	.	.	.	.	G	C	.	.	-	-	.	.	G	A	G	C	A	G	.	.	A	C	T	C	.	C	.	.	A	.	G	.	A	.	.	A	.	A	.	G	C	-	A	.
		Testudines	P.sinensis	T	C	.	C	.	.	G	.	.	.	-	-	.	.	G	A	G	G	A	G	.	.	A	.	.	C	.	C	.	.	C	A	G	.	.	.	G	.	.	.	.	G	.	.	A	.
			C.picta	T	C	.	.	.	.	G	.	.	.	-	-	.	.	G	A	G	G	A	G	.	.	A	.	.	.	.	C	.	.	C	A	G	.	.	.	G	.	.	.	.	G	.	.	A	.
			C.mydas	T	C	.	.	.	.	G	.	.	.	-	-	.	.	G	A	G	G	A	G	.	.	A	.	.	C	.	C	.	.	C	A	G	.	.	.	G	.	.	.	.	G	.	.	A	.
		Crocodylia	A.sinensis	.	.	C	.	.	.	G	.	.	C	-	-	A	C	G	A	.	G	A	G	.	.	A	.	G	C	.	C	.	.	.	.	G	.	.	C	G	T	C	.	.	G	.	.	A	.
			A.mississippiensis	.	.	C	.	.	.	G	.	.	C	-	-	A	C	G	A	.	G	A	G	.	.	A	.	G	C	.	C	.	.	.	.	G	.	.	C	G	T	C	.	.	G	.	.	A	.
		Aves	S.camelus	.	.	.	.	.	.	G	.	.	.	-	-	.	.	G	A	.	G	G	C	.	.	A	.	.	C	.	C	.	.	.	.	.	.	.	.	G	A	C	.	.	G	.	.	A	.
			A.platyrhynchos	.	.	.	.	.	C	G	.	.	.	-	-	.	.	G	A	.	G	A	C	.	.	A	.	.	C	.	C	.	.	.	.	.	.	.	C	C	A	C	.	.	G	.	.	A	.
			M.gallopavo	.	.	.	.	.	.	G	.	.	.	-	-	.	.	G	A	.	G	A	C	G	.	A	.	.	C	.	C	.	.	.	.	.	.	A	C	C	A	C	.	.	G	.	.	A	.
			G.gallus	.	.	.	.	.	.	G	.	.	.	-	-	.	.	G	A	.	G	A	C	G	.	A	.	.	C	.	C	.	.	C	.	.	.	.	C	C	A	C	.	.	G	.	.	A	.
			C.carolinensis	.	.	.	.	.	.	C	.	.	.	-	-	.	C	.	A	.	A	A	C	.	.	A	.	.	C	.	C	A	.	C	A	.	.	.	C	.	C	C	.	.	G	.	.	A	.
			C.anna	.	.	.	.	.	.	G	.	.	.	-	-	.	C	.	A	.	G	G	C	.	.	A	.	.	C	.	C	A	G	C	A	.	.	.	C	.	C	C	.	T	G	.	.	A	.
			C.pelagica	.	.	.	.	.	.	G	.	.	.	-	-	.	C	.	A	.	G	G	C	.	.	A	.	.	C	.	C	A	.	C	A	.	.	.	.	G	C	C	.	.	G	.	.	A	.
			C.livia	.	.	.	.	.	.	G	.	.	.	-	-	.	C	G	A	.	G	A	C	.	.	A	.	.	C	.	C	.	.	C	.	.	.	.	C	.	C	.	.	.	G	.	.	A	.
			A.forsteri	.	.	.	.	.	.	G	.	.	.	-	-	.	C	G	A	.	G	A	C	.	.	A	.	.	C	.	C	.	.	A	.	.	.	.	C	G	C	C	.	.	G	.	.	A	.
			P.adeliae	.	.	.	.	.	.	G	.	.	.	-	-	.	C	G	A	.	G	A	C	.	.	A	.	.	C	.	C	.	.	C	.	.	.	.	C	G	C	C	.	.	G	.	.	A	.
			P.crispus	.	.	.	.	.	.	G	.	.	.	-	-	.	C	.	A	.	G	A	C	.	.	A	.	.	C	.	C	.	.	.	.	.	C	.	C	G	T	C	.	.	G	.	.	A	.
			C.striatus	.	.	.	.	.	.	G	.	.	.	-	-	.	C	.	A	.	G	A	C	.	.	A	.	.	C	.	C	.	G	.	.	.	.	.	C	.	C	C	.	.	G	T	.	A	.
			F.albicollis	.	.	.	A	G	.	G	A	.	.	-	-	.	.	G	A	.	G	G	C	.	.	A	.	.	C	.	C	.	G	A	.	.	.	.	C	.	C	C	.	.	G	.	.	A	.
			T.guttata	.	.	.	.	.	.	G	A	.	.	-	-	.	.	G	A	.	G	G	C	.	.	A	.	.	C	.	C	.	G	.	.	.	.	.	.	.	C	C	.	.	G	.	.	A	.
	Mammalia	Marsupialia	P.cinereus	.	.	.	.	.	.	C	.	.	.	.	.	.	C	.	.	.	.	.	.	.	.	.	.	G	.	.	.	.	.	.	.	.	.	.	.	G	.	.	.	.	.	.	.	.	.
			M.domestica	.	.	.	.	.	.	.	.	.	.	.	.	.	.	.	.	.	.	.	.	.	.	.	.	.	.	.	.	.	.	.	.	.	.	.	.	G	.	.	.	.	.	.	.	.	.
			S.harrisii	.	.	.	.	.	.	C	.	.	.	.	.	A	C	.	.	.	.	.	.	.	.	.	.	.	.	.	.	.	.	.	A	.	.	.	.	G	.	.	.	.	.	.	.	.	.
		Xenarthra	D.novemcinctus	.	.	.	G	.	.	.	.	.	.	.	.	.	.	.	.	.	.	.	.	.	.	.	.	.	.	.	.	C	.	.	.	.	.	.	A	.	.	.	.	.	.	.	.	.	.
		Afrotheria	L.africana	.	.	.	.	.	.	.	.	.	.	.	.	.	.	.	.	.	.	.	.	.	.	.	.	.	.	.	.	A	.	.	.	G	.	.	.	.	.	G	.	.	.	.	.	.	.
			E.edwardii	.	.	.	.	.	.	.	.	.	.	.	.	.	.	G	.	.	.	.	.	.	.	.	.	.	.	.	.	.	.	.	.	G	.	.	.	.	.	.	.	.	.	.	.	.	.
			E.telfairi	.	.	.	.	.	.	.	.	.	.	.	.	.	.	.	.	G	C	.	.	.	.	.	.	T	.	.	.	.	.	.	.	G	.	.	.	.	.	.	.	C	.	.	.	.	.
			C.asiatica	.	.	.	.	.	.	.	.	.	.	.	.	.	.	.	.	.	.	.	.	.	.	.	.	.	.	.	.	.	.	.	.	G	.	.	.	.	.	.	.	.	.	.	.	.	.
		Eulipotyphla	E.europaeus	T	.	C	.	.	.	.	G	.	.	C	.	.	.	.	.	.	C	.	.	.	.	.	.	.	.	.	.	.	.	.	.	.	.	.	C	.	A	.	.	.	.	.	.	.	.
			S.araneus	.	.	.	.	.	.	.	.	.	.	.	.	.	C	.	.	.	.	.	.	.	.	.	.	.	.	.	.	.	.	.	A	.	.	.	.	G	.	.	.	.	.	.	.	.	.
		Perissodactyla	E.caballus	.	.	.	.	.	-	.	.	.	.	.	.	A	.	.	.	.	.	.	.	.	.	.	.	.	.	.	.	.	.	.	.	.	.	.	.	.	.	.	.	.	.	.	.	.	.
			E.asinus	.	.	.	.	.	-	.	.	.	.	.	.	A	.	.	.	.	.	.	.	.	.	.	.	.	.	.	.	.	.	.	.	.	.	.	.	.	.	.	.	.	.	.	.	.	.
		Carnivora	A.jubatus	.	.	.	.	.	.	.	.	.	.	.	.	.	.	.	.	.	.	.	.	.	.	.	.	.	.	.	.	.	.	.	.	.	.	.	.	.	.	.	.	G	.	.	.	.	.
			F.catus	.	.	.	.	.	.	.	.	.	.	.	.	.	.	.	.	.	.	.	.	.	.	.	.	.	.	.	.	.	.	.	.	.	.	.	.	.	.	.	.	G	.	.	.	.	.
			C.familiaris	.	.	.	.	.	.	.	.	.	.	.	.	.	C	G	.	.	.	.	.	.	.	.	.	.	C	.	.	.	.	.	.	.	.	.	.	.	.	.	.	G	.	.	.	.	.
			U.maritimus	.	.	.	.	.	.	.	.	.	.	.	.	.	.	.	.	.	.	.	.	.	.	.	.	.	.	.	.	.	.	.	.	.	.	.	.	.	.	.	A	G	.	.	.	.	.
			A.melanoleuca	.	.	.	.	.	.	.	.	.	.	.	.	.	.	.	.	.	.	.	.	.	.	.	.	.	.	.	.	.	.	.	.	.	.	.	.	.	.	.	.	G	.	.	.	.	.
			M.putorius	.	.	.	.	.	.	.	.	.	.	.	.	.	.	.	.	.	.	.	.	.	.	.	.	.	.	.	.	.	.	.	.	.	.	.	.	.	.	.	.	G	.	.	.	.	.
			O.rosmarus	.	.	.	.	.	.	.	.	.	.	.	.	.	.	.	.	.	.	.	.	T	.	.	.	T	.	.	.	.	.	.	.	.	.	.	.	.	.	.	.	.	.	.	.	.	.
			L.weddellii	.	.	.	.	.	.	.	.	.	.	.	.	.	.	C	.	.	.	.	.	.	.	.	.	T	.	.	.	.	.	.	.	.	.	.	.	.	.	.	.	G	.	.	.	.	.
		Chiroptera	R.aegyptiacus	.	.	.	.	.	.	.	.	.	.	.	.	.	.	.	.	.	.	.	.	.	.	.	.	.	.	.	.	.	.	.	.	.	.	.	.	.	C	.	.	.	.	.	.	.	.
			P.alecto	.	.	.	.	.	.	.	.	.	.	.	.	.	.	.	.	.	.	.	.	.	.	.	.	.	.	.	.	.	.	.	.	.	.	.	.	.	C	.	.	.	.	.	.	.	.
			P.vampyrus	.	.	.	.	.	.	.	.	.	.	.	.	.	.	.	.	.	.	.	.	.	.	.	.	.	.	.	.	.	.	.	.	.	.	.	.	.	C	.	.	.	.	.	.	.	.
			H.armiger	.	.	.	.	.	.	.	.	.	.	.	.	.	C	.	.	.	.	.	.	.	.	.	.	.	.	.	.	.	.	.	.	.	.	.	.	.	C	.	.	.	.	.	.	.	.
			R.sinicus	.	.	.	.	.	.	.	.	.	.	.	.	.	.	.	.	.	.	.	.	.	.	.	.	.	.	.	.	.	.	.	.	.	.	.	.	.	C	.	.	.	.	.	.	.	.
			M.natalensis	.	.	.	.	.	.	.	.	C	.	.	.	.	.	.	.	G	.	.	.	C	.	.	.	.	.	.	.	.	.	.	.	.	.	A	.	.	C	.	.	.	.	.	.	.	.
			E.fuscus	.	.	C	G	.	C	C	G	.	.	C	.	.	C	.	.	.	.	.	.	C	.	.	.	.	.	.	.	.	.	.	.	.	.	.	C	G	C	.	.	.	G	.	.	.	C
			M.davidii	.	.	C	C	G	C	.	G	.	.	C	.	.	.	.	.	.	.	.	.	C	.	.	.	.	.	.	.	.	.	.	.	.	.	.	C	.	T	G	.	.	G	.	.	.	C
			M.lucifugus	.	.	C	C	.	C	.	G	.	.	.	.	.	.	.	.	.	.	.	.	.	.	.	.	.	.	.	.	.	.	.	.	.	.	.	C	.	C	.	.	.	G	.	.	.	C
		Cetartiodactyla	V.pacos	T	.	.	.	-	.	.	.	.	.	.	.	.	.	.	.	.	.	.	.	.	.	.	.	.	.	.	.	.	.	.	.	.	.	.	.	.	.	.	.	.	.	.	.	.	.
			C.ferus	T	.	.	-	.	.	.	.	.	.	.	.	.	.	.	.	.	.	.	.	.	.	.	.	.	.	.	.	.	.	.	.	.	.	.	.	.	.	.	.	.	.	.	.	.	.
			S.scrofa	.	.	.	.	.	.	.	.	.	.	.	.	.	.	.	.	.	.	.	.	.	.	.	.	.	.	.	.	.	.	.	.	.	.	.	.	.	.	.	.	.	.	.	.	.	.
			O.aries	.	.	.	.	-	.	.	.	.	.	.	C	A	.	.	.	.	.	.	.	.	.	.	C	.	.	.	.	.	.	A	.	.	.	.	.	.	.	.	.	.	.	.	.	.	.
			B.taurus	.	.	.	.	-	.	.	.	.	.	.	C	A	.	.	.	.	.	.	.	.	.	.	C	.	.	.	.	.	.	A	.	.	.	.	.	.	.	.	.	.	.	.	.	.	.
			B.bison	.	.	.	.	-	.	.	.	.	.	.	C	A	.	.	.	.	.	.	.	.	.	.	C	.	.	.	.	.	.	A	.	.	.	.	.	.	.	.	.	.	.	.	.	.	.
			B.acutorostrata	.	.	.	.	.	.	.	.	.	.	.	.	.	.	.	.	.	.	.	.	.	.	.	.	.	.	.	.	.	.	.	.	.	.	.	.	.	.	.	.	.	.	.	.	.	.
			P.catodon	.	.	.	.	.	.	.	.	.	.	.	.	.	.	.	.	.	.	.	.	.	.	.	.	.	.	.	.	.	.	.	.	.	.	.	.	.	.	.	.	.	.	.	.	.	.
			T.truncatus	.	G	.	.	.	.	.	.	.	.	.	.	.	.	.	.	.	.	.	.	.	.	.	.	.	.	.	.	.	.	.	.	.	.	.	.	.	.	.	.	.	.	.	.	.	.
			O.orca	.	.	.	.	.	.	.	.	.	.	.	.	.	.	.	.	.	.	.	.	.	.	.	.	.	.	.	.	.	.	.	.	.	.	.	.	.	.	.	.	.	.	.	.	.	.
		Lagomorpha	O.princeps	.	.	.	.	.	.	.	.	.	.	.	.	.	C	.	.	.	.	.	.	.	.	.	.	.	.	.	.	.	.	.	.	.	.	C	.	.	.	.	.	.	.	.	.	.	.
			O.cuniculus	.	.	.	.	.	.	.	.	.	.	.	.	.	.	.	.	.	.	.	.	C	.	.	.	.	.	.	.	.	.	.	.	.	.	C	.	.	.	.	.	.	.	.	.	.	.
		Rodentia	C.porcellus	.	.	.	.	.	.	.	.	.	.	.	.	.	.	G	.	.	.	.	.	.	.	.	.	.	.	.	C	.	.	.	.	.	.	.	.	.	.	.	.	.	.	.	.	.	.
			I.tridecemlineatus	.	.	.	.	.	G	.	.	.	.	.	.	.	.	G	.	.	.	.	.	.	.	.	.	.	.	.	.	.	.	.	.	.	.	.	.	.	.	.	.	.	.	.	.	.	.
			M.marmota	.	.	.	.	.	.	.	.	.	.	.	.	.	.	G	.	.	.	.	.	.	.	.	.	.	.	.	.	.	.	.	.	.	.	.	.	.	.	.	.	.	.	.	.	.	.
			J.jaculus	.	.	.	.	.	.	.	G	.	.	.	.	.	G	G	.	.	.	.	.	.	.	.	.	.	.	.	.	.	C	.	.	.	.	.	.	G	.	.	.	.	.	.	.	.	.
			R.norvegicus	.	.	.	.	.	.	.	G	.	.	.	.	.	G	G	.	.	.	.	.	.	.	.	.	.	A	.	G	.	.	.	.	.	.	.	.	.	.	.	.	.	.	.	.	.	.
			M.musculus	.	.	.	.	.	.	.	G	.	.	.	.	.	G	G	.	.	.	.	.	.	.	.	.	.	A	.	.	.	.	.	.	.	.	.	.	.	.	.	.	.	.	.	.	.	.
			P.maniculatus	.	.	.	.	.	.	C	G	.	.	A	.	.	G	G	.	.	.	.	.	.	.	.	.	.	A	.	.	.	.	.	.	.	.	.	.	.	.	.	.	.	.	.	.	.	.
			C.griseus	A	.	.	.	.	.	.	G	.	.	A	.	.	G	G	.	.	.	.	.	.	.	.	.	.	A	.	.	.	.	.	.	.	.	.	.	.	.	.	.	.	.	.	.	.	.
			M.auratus	A	.	.	.	.	.	.	G	.	.	A	.	.	G	G	.	.	.	.	.	.	.	.	.	.	A	.	.	.	.	.	.	.	.	.	.	.	.	.	.	.	.	.	.	.	.
		Primates	M.murinus	.	.	.	.	T	.	.	.	.	.	.	.	.	.	.	.	.	.	.	.	.	.	.	.	.	.	.	.	.	.	.	.	.	.	.	.	.	.	.	.	.	.	.	.	.	.
			O.garnettii	.	.	.	C	T	.	.	A	.	.	.	.	A	.	.	.	.	.	.	.	.	.	.	C	.	.	.	.	.	.	.	.	.	.	.	.	.	.	.	T	.	.	.	.	.	.
			C.syrichta	.	.	.	C	T	.	G	.	.	.	.	.	.	.	.	.	.	.	.	.	.	.	.	.	A	.	.	.	.	.	.	.	.	.	.	.	.	.	.	.	.	.	.	.	.	.
			C.jacchus	.	.	.	.	T	.	.	.	.	.	.	.	.	.	.	.	.	.	.	.	.	.	.	.	.	.	.	.	.	.	.	.	.	.	.	.	.	.	.	.	.	.	.	.	.	.
			C.sabaeus	.	.	.	.	T	.	.	.	.	.	.	.	.	.	G	.	.	.	.	.	.	.	.	C	.	.	.	.	.	.	.	.	.	.	.	.	.	.	.	.	.	.	.	.	.	.
			P.anubis	.	.	.	.	T	.	.	.	.	.	.	.	.	.	G	.	.	.	.	.	.	.	.	C	.	.	.	.	.	.	.	.	.	.	.	.	.	.	.	.	.	.	.	.	.	.
			M.mulatta	.	.	.	.	T	.	.	.	.	.	.	.	.	.	G	.	.	.	.	.	.	.	.	C	.	.	.	.	.	.	.	.	.	.	.	.	.	.	.	.	.	.	.	.	.	.
			N.leucogenys	.	.	.	.	T	.	.	.	.	.	.	.	.	.	.	.	.	.	.	.	.	.	.	.	.	.	.	.	.	.	.	.	.	.	.	.	.	.	.	.	.	.	.	.	.	.
			P.abelii	.	.	.	.	T	.	.	.	.	.	.	.	.	.	.	.	.	.	.	.	.	.	.	.	.	.	.	.	.	.	.	.	.	.	.	.	.	.	.	.	.	.	.	.	.	.
			G.gorilla	.	.	.	.	T	.	.	.	.	C	.	.	.	.	.	.	.	.	.	.	.	.	.	.	.	.	.	.	.	.	.	.	.	.	.	.	.	.	.	.	.	.	.	.	.	.
			P.troglodytes	.	.	.	.	T	.	.	.	.	.	.	.	.	.	.	.	.	.	.	.	.	.	.	.	.	.	.	.	.	.	.	.	.	.	.	.	.	.	.	.	.	.	.	.	.	.
			H.sapiens	.	.	.	.	T	.	.	.	.	.	.	.	.	.	.	.	.	.	.	.	.	.	.	.	.	.	.	.	.	.	.	.	.	.	.	.	.	.	.	.	.	.	.	.	.	.
		Consensus sequence		C	T	T	T	C	A	T	T	A	T	T	T	G	T	A	G	A	T	T	T	A	T	T	T	C	T	T	T	T	A	T	G	A	A	G	T	A	G	T	C	A	A	A	T	G	A
		Identity (%)		76.2887	84.5361	82.4742	79.3814	70.1031	81.4433	58.7629	70.1031	87.6289	85.567	57.732	60.8247	79.3814	64.9485	53.6082	63.9175	78.3505	61.8557	63.9175	63.9175	81.4433	88.6598	63.9175	76.2887	78.3505	58.7629	88.6598	61.8557	81.4433	82.4742	73.1959	80.4124	74.2268	87.6289	79.3814	69.0722	69.0722	58.7629	70.1031	84.5361	79.3814	60.8247	83.5052	83.5052	63.9175	84.5361
		Nucleotide count per position
		Adenin	A	3	0	0	1	0	79	0	3	85	0	3	0	9	0	52	24	76	1	19	0	79	0	24	0	1	5	0	0	4	80	6	8	72	85	7	1	67	8	0	3	77	59	81	0	24	82
		Timin	T	9	82	80	77	12	0	57	68	0	83	56	59	0	63	0	0	0	60	62	62	1	86	62	74	6	57	86	60	79	0	71	0	0	0	0	67	0	4	68	1	1	0	1	81	0	1
		Citosin	C	74	3	6	5	68	4	5	5	1	3	3	3	0	17	1	0	0	5	0	14	4	0	0	12	76	24	0	25	2	1	9	0	0	1	2	18	3	17	16	82	1	0	3	0	0	3
		Guanin	G	0	1	0	2	2	1	24	10	0	0	0	0	77	6	33	62	10	20	5	10	2	0	0	0	3	0	0	1	1	5	0	78	14	0	77	0	16	57	2	0	7	27	0	0	62	0
		Missing information	N	0	0	0	0	0	0	0	0	0	0	0	0	0	0	0	0	0	0	0	0	0	0	0	0	0	0	0	0	0	0	0	0	0	0	0	0	0	0	0	0	0	0	0	0	0	0
		GAP	-	11	11	11	12	15	13	11	11	11	11	35	35	11	11	11	11	11	11	11	11	11	11	11	11	11	11	11	11	11	11	11	11	11	11	11	11	11	11	11	11	11	11	12	16	11	11
[truncated: 223 more columns]

## Sheet: Table S4B
Supplementary Table 4B. List of predicted TFBSs from Mulan and multiTF tools.
Actinopterygii extended core promoter
>L.oculatus
V$PBX1_01 | 2 (-) | tTGATTTAT
V$CDXA_02 | 5 (+) | atTtata
V$MRF2_01 | 6 (-) | TTTATATTGCGcag
V$CEBPB_02 | 9 (+) | ataTTGCGCAGttg
V$CEBP_Q2 | 9 (+) | ataTTGcgcagttg
V$MEIS1_01 | 62 (+) | cctTGACAGaga
V$CDPCR1_01 | 74 (+) | aATGGATctc
V$CDPCR3HD_01 | 74 (+) | aATGGATctc
V$TBX5B_01 | 80 (-) | tcTCACCt
V$MEIS1_01 | 86 (+) | ctcTGACAGcta
V$TGIF_01 | 86 (-) | CTCTGACAGCT
V$PBX_Q3 | 98 (+) | GATTCAttgttg
V$PAX8_B | 101 (+) | tcattgttGCCTGactag
V$AHRARNT_02 | 102 (+) | CATTGTTGCCTGACTAGCC
V$PAX8_01 | 102 (+) | cattgttgccTGact
V$RFX1_01 | 104 (-) | ttGTTGCCTGACTAGcc
V$NFY_Q6_01 | 113 (+) | gactagCCAATca
V$CAAT_01 | 114 (+) | actagCCAATca
V$NFY_01 | 114 (+) | actagCCAATcattga
V$NFY_C | 114 (-) | actAGCCAATCAtt
V$ALPHACP1_01 | 116 (+) | TAGCCAATCAT
V$NFY_Q6 | 116 (+) | tagCCAATcat
V$CDP_01 | 119 (+) | CCAATCATTGAA
V$HNF6_Q6 | 123 (-) | tcATTGAATTtt
V$PAX3_01 | 127 (-) | tgaaTTTTGACGA
V$ATF1_Q6 | 131 (+) | TTTTGACGACA
V$CREBATF_Q6 | 133 (+) | tTGACGaca
V$CREB_Q3 | 133 (-) | tTGACG
V$EGR3_01 | 154 (+) | caGAGTGGGGGt
V$MTATA_B | 157 (-) | agtgggggTATAAAaag
V$MOVOB_01 | 158 (+) | gtGGGGG
V$SREBP1_02 | 158 (-) | GTGGGGGTATa
V$AMEF2_Q6 | 160 (+) | gggggTATAAAAAGCcca
V$MTATA_B | 162 (+) | gggTATAAAaagcccag
V$TATA_C | 163 (+) | gGTATAAAAa
V$TATA_01 | 164 (+) | gTATAAAaagcccag
V$TBP_Q6 | 164 (-) | gtATAAA
V$BRACH_01 | 185 (-) | tATATGACACCTATCGGTGTggtg
V$TGIF_01 | 186 (-) | ATATGACACCT
V$SEF1_C | 187 (-) | tATGACACCTATCGGTGTG
V$TBX5_01 | 187 (-) | taTGACACCTat
V$CDPCR3_01 | 189 (-) | TGACACCTATCGGTG
V$SEF1_C | 190 (+) | GACACCTATCGGTGTGGTg
V$CDPCR3_01 | 192 (+) | CACCTATCGGTGTGG
V$OSF2_Q6 | 200 (-) | ggTGTGGT
V$AML1_01 | 202 (+) | TGTGGT
V$AML1_Q6 | 202 (+) | TGTGGT
V$HNF4_01 | 209 (+) | gatgGTTCAAAGTATAgaa
V$LEF1TCF1_Q4 | 211 (-) | tggttCAAAGt
V$HNF4_Q6_01 | 212 (+) | gGTTCAAAGTATAg
V$LEF1_Q2_01 | 213 (+) | gttCAAAGta
V$LEF1B_01 | 214 (-) | ttCAAAG
V$TCF4_Q5 | 214 (-) | tTCAAAGt
V$LEF1_Q2 | 215 (+) | TCAAAG
V$TCF4_Q5 | 239 (+) | gCTTTGAa
V$CEBPGAMMA_Q6 | 239 (-) | gCTTTGAAATAAg
V$LEF1B_01 | 240 (+) | CTTTGaa
V$LEF1_Q2 | 240 (-) | CTTTGA
V$ELF1_Q6 | 247 (+) | ataagAGGAAat
V$ELK1_01 | 247 (+) | ataAGAGGAAATAAat
V$ETS2_B | 249 (+) | aaGAGGAAataaat
V$ETS1_B | 250 (+) | aGAGGAAATAAATac
V$ETS_Q6 | 251 (-) | gaGGAAat
V$STAT5A_03 | 252 (-) | agGAAata
V$STAT6_01 | 252 (-) | agGAAata
V$NKX62_Q2 | 254 (+) | gaaaTAAATaca
V$PAX4_04 | 266 (+) | aAACATTAAGAAAGATACGCACCAAACACt
V$CEBPB_01 | 268 (+) | acaTTAAGAAAgat
V$E2F_03 | 280 (-) | atacGCACCAAA
V$E2F_Q6_01 | 281 (+) | tacgCACCAAac
V$E2F1_Q4_01 | 283 (-) | cgCACCAAA
V$E2F1_Q6_01 | 283 (-) | cgCACCAAAc
V$E2F_Q3_01 | 283 (-) | cgCACCAAA
V$E2F1DP1RB_01 | 284 (-) | GCACCAAA
V$E2F4DP1_01 | 284 (-) | GCACCAAA
V$E2F_02 | 284 (-) | GCACCAAA
V$E2F_Q3 | 284 (-) | GCACCAAA
V$E2F_Q4 | 284 (-) | gCACCAAA
>D.rerio
V$PIT1_Q6 | 1 (+) | ttTTCATAAATCTgcata
V$HOX13_01 | 3 (+) | tTCATAAATCTGCATAATTTCTCAGGTTCa
V$OCT1_04 | 3 (-) | ttcaTAAATCTGCATAATttctc
V$CDXA_01 | 5 (-) | cataAAt
V$OCT1_01 | 5 (-) | catAAATCTGCATAATttc
V$POU6F1_01 | 14 (+) | GCATAATTTCT
V$NKX25L_01 | 15 (+) | caTAATT
V$SREBP1_02 | 36 (+) | gATTTCCCCAC
V$STAT1_02 | 36 (+) | gatTTCCc
V$STAT1_03 | 36 (+) | gatTTccc
V$STAT6_02 | 36 (+) | gatTTCcc
V$HES1_Q2 | 39 (-) | ttcccCACGAGtcct
V$MZF1_01 | 40 (-) | TCCCCacg
V$NMYC_01 | 41 (+) | cccCACGAGtcc
V$USF_Q6 | 42 (+) | ccCACGAGtc
V$OLF1_01 | 44 (+) | cacgAGTCCTCAAAGatgtgtt
V$LEF1_Q2 | 53 (+) | TCAAAG
V$AP4_Q5 | 76 (-) | aaGAGCTGcg
V$E2F_Q3 | 81 (-) | CTGCGAAA
V$HNF4_Q6 | 89 (+) | gaaGTCCAg
V$PAX6_Q2 | 89 (-) | gAAGTCCAGCTCTG
V$FOXM1_01 | 91 (-) | AGTCCAGCT
V$HNF1_Q6_01 | 107 (-) | ttagGTTTATTGTTgccagct
V$HNF1_01 | 110 (+) | gGTTTATTGTTgcca
V$PBX1_01 | 112 (-) | tTTATTGTT
V$RFX1_01 | 116 (-) | ttGTTGCCAGCTCAGcc
V$RFX1_02 | 116 (-) | ttGTTGCCAGCTCAGCca
V$PAX6_Q2 | 117 (-) | tGTTGCCAGCTCAG
V$NFY_Q6_01 | 125 (+) | gctcagCCAATca
V$CAAT_01 | 126 (+) | ctcagCCAATca
V$NFY_01 | 126 (+) | ctcagCCAATcattga
V$NFY_C | 126 (-) | ctcAGCCAATCAtt
V$ALPHACP1_01 | 128 (+) | CAGCCAATCAT
V$NFY_Q6 | 128 (+) | cagCCAATcat
V$ACAAT_B | 128 (-) | CAGCCAATc
V$CDP_01 | 131 (+) | CCAATCATTGAA
V$CREB_Q2 | 143 (-) | tctTACGACAca
V$CREB_Q4 | 143 (-) | tcTTACGACAca
V$E4F1_Q6 | 144 (+) | ctTACGACAC
V$ARP1_01 | 159 (-) | agTGGCCAAAGTTGCA
V$PPAR_DR1_Q2 | 161 (-) | tGGCCAAAGTTGc
V$TATA_C | 174 (+) | aGTATAAAAa
V$TATA_01 | 175 (+) | gTATAAAaagccttg
V$TBP_Q6 | 175 (-) | gtATAAA
V$ATATA_B | 192 (+) | gAATTTAAGc
V$PAX3_B | 193 (-) | aatttaAGCATGACatctact
V$POU1F1_Q6 | 194 (-) | atTTAAGCAT
V$BRACH_01 | 199 (-) | aGCATGACATCTACTTGTCCggtg
V$AHRHIF_Q6 | 221 (+) | tgCGTGgtg
V$CREB_02 | 224 (+) | gtGGTGAGGttc
V$OCT_C | 233 (+) | tTCATTTCCATag
V$OCT1_Q5_01 | 234 (+) | tcATTTCCATa
V$OCT_Q6 | 234 (+) | tcaTTTCCATa
V$OCT4_01 | 236 (-) | aTTTCCATAGCAAat
V$EFC_Q6 | 237 (-) | tTTCCATAGcaaat
V$GFI1_01 | 240 (+) | ccaTAGCAAATCAGAACATCAaac
V$NFY_01 | 241 (+) | catagCAAATcagaac
V$ALPHACP1_01 | 243 (+) | TAGCAAATCAG
V$NFY_Q6 | 243 (+) | tagCAAATcag
V$GFI1B_01 | 246 (+) | cAAATCAGAACa
V$GR_01 | 246 (-) | caaatcAGAACAtcaaacatcctttag
V$PBX1_03 | 255 (+) | acATCAAACatc
V$CETS1P54_03 | 258 (-) | tcaaacaTCCTttagc
V$CETS1P54_02 | 260 (-) | aaacaTCCtttag
V$PEA3_Q6 | 262 (+) | ACATCCt
V$WHN_B | 270 (+) | tagcACGCctt
V$AHRHIF_Q6 | 270 (-) | tagCACGcc
V$ZF5_B | 270 (-) | taGCACGccttgg
>G.morhua
V$AHR_Q5 | 8 (-) | ggaCACGCtcg
V$DEAF1_02 | 10 (+) | acacgCTCGGCACGTGTTCGgagac
V$ARNT_02 | 13 (+) | cgctcggCACGTGttcggag
V$MYCMAX_03 | 13 (+) | cgctcggCACGTGttcggag
V$ARNT_02 | 13 (-) | cgctcggCACGTGttcggag
V$MYCMAX_03 | 13 (-) | cgctcggCACGTGttcggag
V$ARNT_01 | 15 (+) | ctcggCACGTGttcgg
V$HIF1_Q3 | 15 (-) | ctcgGCACGTgttc
V$MAX_01 | 16 (+) | tcggCACGTGttcg
V$MYCMAX_01 | 16 (+) | tcGGCACGTGTTcg
V$STRA13_01 | 16 (+) | tcgGCACGTGTtcg
V$USF_01 | 16 (+) | tcggCACGTGttcg
V$HIF1_Q5 | 16 (-) | tcggCACGTgtt
V$MAX_01 | 16 (-) | tcggCACGTGttcg
V$MYCMAX_01 | 16 (-) | tcGGCACGTGTTcg
V$USF_01 | 16 (-) | tcggCACGTGttcg
V$AREB6_03 | 17 (+) | cggCACGTGttc
V$NMYC_01 | 17 (+) | cggCACGTGttc
V$AHRHIF_Q6 | 17 (-) | cggCACGtg
V$MYOD_01 | 17 (-) | cggCACGTGttc
V$NMYC_01 | 17 (-) | cggCACGTGttc
V$USF_Q6_01 | 17 (-) | cggCACGTGttc
V$SREBP1_01 | 18 (-) | gGCACGTGTTc
V$EBOX_Q6_01 | 19 (+) | gCACGTGttc
V$USF_C | 19 (+) | gCACGTGt
V$CLOCKBMAL_Q6 | 19 (-) | gCACGTGt
V$MYC_Q2 | 19 (-) | gCACGTG
V$USF_C | 19 (-) | gCACGTGt
V$MYC_Q2 | 20 (+) | CACGTGt
V$USF2_Q6 | 20 (+) | CACGTG
V$USF2_Q6 | 20 (-) | CACGTG
V$GATA2_01 | 44 (-) | cgctATCcct
V$RBPJK_01 | 64 (+) | acGGTGAGAAa
V$E2_Q6 | 75 (+) | aaAAAAAAGTCGGTaa
V$PAX9_B | 89 (+) | aagATTCATTGTTGCCAGtccagc
V$PBX_Q3 | 91 (+) | GATTCAttgttg
V$RFX1_01 | 97 (-) | ttGTTGCCAGTCCAGcc
V$RFX1_02 | 97 (-) | ttGTTGCCAGTCCAGCca
V$NFY_Q6_01 | 106 (+) | gtccagCCAATca
V$CAAT_01 | 107 (+) | tccagCCAATca
V$NFY_01 | 107 (+) | tccagCCAATcataga
V$NFY_C | 107 (-) | tccAGCCAATCAta
V$ALPHACP1_01 | 109 (+) | CAGCCAATCAT
V$NFY_Q6 | 109 (+) | cagCCAATcat
V$ACAAT_B | 109 (-) | CAGCCAATc
V$CDP_01 | 112 (+) | CCAATCATAGAT
V$RORA2_01 | 137 (+) | aaAAGTGGGTAAa
V$PITX2_Q2 | 151 (-) | ttGGGAGTAta
V$MTATA_B | 155 (+) | gagTATAAAaagctgcg
V$TATA_C | 156 (+) | aGTATAAAAa
V$TATA_01 | 157 (+) | gTATAAAaagctgcg
V$TBP_Q6 | 157 (-) | gtATAAA
V$ZBRK1_01 | 161 (-) | AAAAAGCTGCGCCGC
V$VMAF_01 | 170 (+) | cgccGCTGATGAAGCacca
V$BACH2_01 | 177 (-) | gaTGAAGCAcc
V$HES1_Q2 | 179 (-) | tgaagCACCAGgccg
V$AP2_Q3 | 182 (+) | agCACCAGGCcgtgcc
V$NRF1_Q6 | 196 (+) | CCAGTGCGCa
V$VMAF_01 | 199 (-) | gtgcGCATCATCATCaaca
V$CAAT_C | 221 (+) | tCCATCCACCACACGCTTCCCTTCG
V$PAX4_01 | 225 (-) | tccaccaCACGCTTCCCTTCg
V$AML1_01 | 228 (-) | ACCACA
V$AML1_Q6 | 228 (-) | ACCACA
V$AHRHIF_Q6 | 229 (-) | ccaCACGct
V$STAT3_02 | 234 (+) | cgcTTCCc
V$GEN_INI3_B | 257 (-) | cACTGagg
>G.aculeatus
V$AP2_Q6 | 1 (-) | cgcCCGTGGAcc
V$AP2_Q6_01 | 1 (-) | cGCCCGTGGaccc
V$MYB_Q6 | 10 (-) | acccGTTaag
V$TAXCREB_02 | 14 (+) | gTTAAGCACATGCCC
V$MYCMAX_01 | 16 (+) | taAGCACATGCCca
V$MYCMAX_01 | 16 (-) | taAGCACATGCCca
V$MYCMAX_02 | 17 (+) | aAGCACATGccc
V$ZF5_B | 17 (-) | aaGCACAtgccca
V$MYCMAX_B | 18 (-) | agCACATGcc
V$EBOX_Q6_01 | 19 (+) | gCACATGccc
V$P53_DECAMER_Q2 | 19 (-) | gcaCATGccc
V$NRF1_Q6 | 20 (+) | CACATGCCCa
V$GCM_Q2 | 22 (+) | catgCCCACAGt
V$E2_Q6_01 | 37 (+) | catCCCGTTATGGTTt
V$VMYB_01 | 39 (-) | tcCCGTTatg
V$COMP1_01 | 43 (+) | gttatgGTTTGACAACGGaaaata
V$VMYB_01 | 53 (+) | gacAACGGaa
V$VMYB_02 | 53 (+) | gacAACGGa
V$CETS1P54_02 | 54 (+) | acaacGGAaaata
V$BRCA_01 | 55 (-) | CAACggaa
V$TCF11_01 | 67 (+) | GTCATcatgtcag
V$PPARG_03 | 77 (+) | cagtcGGTTAAAATTCA
V$HNF4ALPHA_Q6 | 82 (-) | ggtTAAAATTCAt
V$AHRARNT_02 | 92 (+) | CATTGTTGCCTGTCCAGCC
V$RFX1_01 | 94 (-) | ttGTTGCCTGTCCAGcc
V$GFI1_01 | 103 (+) | gtcCAGCCAATCATAGTTTTTgac
V$NFY_Q6_01 | 103 (+) | gtccagCCAATca
V$CAAT_01 | 104 (+) | tccagCCAATca
V$NFY_01 | 104 (+) | tccagCCAATcatagt
V$NFY_C | 104 (-) | tccAGCCAATCAta
V$ALPHACP1_01 | 106 (+) | CAGCCAATCAT
V$NFY_Q6 | 106 (+) | cagCCAATcat
V$ACAAT_B | 106 (-) | CAGCCAATc
V$ATF1_Q6 | 120 (+) | TTTTGACGACA
V$CREBATF_Q6 | 122 (+) | tTGACGaca
V$CREB_Q3 | 122 (-) | tTGACG
V$FOXM1_01 | 144 (+) | AGTTGGAGT
V$TATA_C | 150 (+) | aGTATAAAAa
V$TATA_01 | 151 (+) | gTATAAAaaggtgtg
V$TBP_Q6 | 151 (-) | gtATAAA
V$BARBIE_01 | 153 (+) | ataaAAAGGTGTGCG
V$ZF5_B | 158 (+) | aaggtgTGCGCta
V$TBX5_Q5 | 158 (-) | aAGGTGTGCg
V$GZF1_01 | 164 (+) | TGCGCTAATAAA
V$CHX10_01 | 164 (-) | tgcGCTAATAAagt
V$E2F1DP1RB_01 | 165 (-) | GCGCTAAT
V$E2F4DP1_01 | 165 (-) | GCGCTAAT
V$E2F_Q3 | 165 (-) | GCGCTAAT
V$LPOLYA_B | 169 (+) | tAATAAAG
V$TBX5_Q5 | 173 (-) | aAAGTGTGAt
V$TBX5B_01 | 174 (+) | aAGTGTga
V$IPF1_Q4_01 | 194 (+) | tgggaCATTAatcca
V$FXR_IR1_Q6 | 195 (-) | gGGACATTAATCC
V$IPF1_Q4 | 196 (-) | ggACATTAATCC
V$HNF4_Q6 | 229 (+) | tagGTCCAg
V$PAX6_Q2 | 229 (-) | tAGGTCCAGCACAC
V$PAX4_01 | 231 (-) | ggtccagCACACATCGCGGGa
V$E2F_Q4_01 | 241 (-) | aCATCGCGgga
V$E2F4DP2_01 | 246 (-) | GCGGGATT
V$MMEF2_Q6 | 253 (-) | tttttTTTTTAaacaa
V$SRY_01 | 263 (+) | AAACaaa
V$TBX5_01 | 271 (-) | ctGCACACCTta
V$TBX5_Q5 | 272 (+) | tGCACACCTt
V$DELTAEF1_01 | 273 (+) | gcaCACCTtag
V$TBX5_02 | 273 (-) | gcACACCtta
>T.nigroviridis
V$EGR2_01 | 12 (-) | cAGCACACGCAc
V$EGR3_01 | 12 (-) | cAGCACACGCac
V$ZF5_B | 12 (-) | caGCACAcgcaca
V$AHRHIF_Q6 | 14 (-) | gcaCACGca
V$AHR_Q5 | 14 (-) | gcaCACGCaca
V$HIF1_Q3 | 16 (-) | acacGCACATgctc
V$HMX1_01 | 17 (-) | CACGCACATG
V$EGR3_01 | 18 (-) | aCGCACATGCtc
V$MYCMAX_B | 19 (-) | cgCACATGct
V$NRF1_Q6 | 19 (-) | cGCACATGCT
V$NRF1_Q6 | 21 (+) | CACATGCTCa
V$AR_Q6 | 22 (-) | acaTGCTCa
V$EGR3_01 | 24 (-) | aTGCTCACGCtc
V$PAX3_01 | 25 (+) | TGCTCACGCtctc
V$NRF1_Q6 | 25 (-) | tGCTCACGCT
V$AHRHIF_Q6 | 26 (-) | gctCACGct
V$AHR_Q5 | 26 (-) | gctCACGCtct
V$SRF_Q5_02 | 36 (+) | tccgtCCCTGTATGGtttg
V$SRF_Q6 | 39 (-) | gtCCCTGTATGGtt
V$SRF_C | 40 (+) | tCCCTGTATGGTTTg
V$COMP1_01 | 44 (+) | tgtatgGTTTGACAAGGGgggggg
V$SP3_Q3 | 55 (+) | ACAAGGGGGGGGGG
V$MAZR_01 | 58 (+) | aggGGGGGGGggg
V$SP1_Q4_01 | 58 (+) | aggGGGGGGgggg
V$SP1_Q6 | 58 (+) | aggGGGGGGGggg
V$KROX_Q6 | 58 (-) | aggggGGGGGGGgg
V$ZNF219_01 | 58 (-) | AGGGGGGGGGGG
V$MAZR_01 | 59 (+) | gggGGGGGGGggg
V$SP1_Q4_01 | 59 (+) | gggGGGGGGgggg
V$SP1_Q6 | 59 (+) | gggGGGGGGGggg
V$KROX_Q6 | 59 (-) | gggggGGGGGGGgg
V$RREB1_01 | 59 (-) | gGGGGGGGGGGGGG
V$SP1_Q2_01 | 59 (-) | ggGGGGGGGg
V$WT1_Q6 | 59 (-) | GGGGGGGgg
V$ZNF219_01 | 59 (-) | GGGGGGGGGGGG
V$MAZR_01 | 60 (+) | gggGGGGGGGggg
V$SP1_Q4_01 | 60 (+) | gggGGGGGGgggg
V$SP1_Q6 | 60 (+) | gggGGGGGGGggg
V$VDR_Q3 | 60 (+) | GGGGGGGGGGGGgga
V$KROX_Q6 | 60 (-) | gggggGGGGGGGgg
V$RREB1_01 | 60 (-) | gGGGGGGGGGGGGG
V$SP1_Q2_01 | 60 (-) | ggGGGGGGGg
V$WT1_Q6 | 60 (-) | GGGGGGGgg
V$ZNF219_01 | 60 (-) | GGGGGGGGGGGG
V$MAZR_01 | 61 (+) | gggGGGGGGGggg
V$SP1_Q4_01 | 61 (+) | gggGGGGGGgggg
V$SP1_Q6 | 61 (+) | gggGGGGGGGggg
V$KROX_Q6 | 61 (-) | gggggGGGGGGGga
V$SP1_Q2_01 | 61 (-) | ggGGGGGGGg
V$WT1_Q6 | 61 (-) | GGGGGGGgg
V$ZNF219_01 | 61 (-) | GGGGGGGGGGGG
V$MAZR_01 | 62 (+) | gggGGGGGGGgga
V$MZF1_02 | 62 (+) | gggggGGGGGgga
V$KROX_Q6 | 62 (-) | gggggGGGGGGGaa
V$SP1_Q2_01 | 62 (-) | ggGGGGGGGg
V$WT1_Q6 | 62 (-) | GGGGGGGgg
V$ZNF219_01 | 62 (-) | GGGGGGGGGGGG
V$MAZR_01 | 63 (+) | gggGGGGGGGgaa
V$MZF1_02 | 63 (+) | gggggGGGGGgaa
V$SP1_Q2_01 | 63 (-) | ggGGGGGGGg
V$WT1_Q6 | 63 (-) | GGGGGGGgg
V$ZNF219_01 | 63 (-) | GGGGGGGGGGGA
V$MAZR_01 | 64 (+) | gggGGGGGGGaaa
V$MZF1_02 | 64 (+) | gggggGGGGGaaa
V$SP1_Q2_01 | 64 (-) | ggGGGGGGGg
V$WT1_Q6 | 64 (-) | GGGGGGGgg
V$ZNF219_01 | 64 (-) | GGGGGGGGGGAA
V$MAZR_01 | 65 (+) | gggGGGGGGAaaa
V$SP1_01 | 65 (+) | ggGGGGGGga
V$SPZ1_01 | 65 (+) | gggGGGGGGAaaacc
V$WT1_Q6 | 65 (-) | GGGGGGGgg
V$NFKB_Q6_01 | 66 (+) | gggggGGGAAAACCCt
V$MZF1_01 | 67 (+) | gggGGGGA
V$NFKB_Q6_01 | 67 (+) | gggggGGAAAACCCTt
V$E2F1_Q6_01 | 68 (-) | ggGGGGAAAa
V$BEL1_B | 69 (-) | ggGGGAAAACCCTTCCTGTCAGTCGGTt
V$E2F1DP2_01 | 69 (-) | GGGGGAAA
V$E2F1_Q6 | 69 (-) | gGGGGAAa
V$NFKB_C | 70 (-) | gGGGAAAACCCt
V$NFKAPPAB_01 | 71 (+) | GGGAAAACCC
V$NFKAPPAB50_01 | 71 (-) | GGGAAAACCC
V$STAT1_03 | 71 (-) | gggAAaac
V$NERF_Q2 | 72 (-) | ggaaaaccCTTCCTGtca
V$ETS1_B | 73 (-) | gaAAACCCTTCCTGt
V$ETS_Q4 | 75 (+) | aaaccCTTCCTg
V$ETS2_B | 75 (-) | aaacccTTCCTGtc
V$GABP_B | 76 (-) | aaCCCTTCCTGt
V$NRF2_01 | 78 (-) | ccCTTCCTGT
V$PU1_Q6 | 80 (-) | CTTCCTGt
V$MEIS1_01 | 81 (-) | ttcCTGTCAgtc
V$PPARG_03 | 88 (+) | cagtcGGTTTAAGTTCA
V$HNF4ALPHA_Q6 | 93 (-) | ggtTTAAGTTCAt
V$HNF4_Q6_02 | 99 (+) | AGTTCA
V$AHRARNT_01 | 104 (+) | attgttgtGCGTCcag
V$TAXCREB_01 | 109 (-) | tgtgCGTCCAGCCaa
V$NFY_Q6_01 | 114 (+) | gtccagCCAATcc
V$CAAT_01 | 115 (+) | tccagCCAATcc
V$NFY_01 | 115 (+) | tccagCCAATcctggt
V$ACAAT_B | 117 (-) | CAGCCAATc
V$COMP1_01 | 125 (+) | cctggtTTTTGACGACACaaaagc
V$ATF1_Q6 | 131 (+) | TTTTGACGACA
V$CREBATF_Q6 | 133 (+) | tTGACGaca
V$CREB_Q3 | 133 (-) | tTGACG
V$FOXM1_01 | 155 (+) | AGTTGGAGT
V$MTATA_B | 160 (+) | gagTATAAAaaggtgcg
V$TATA_C | 161 (+) | aGTATAAAAa
V$TATA_01 | 162 (+) | gTATAAAaaggtgcg
V$TBP_Q6 | 162 (-) | gtATAAA
V$ZF5_B | 169 (+) | aaggtgCGCGCta
V$LXR_DR4_Q3 | 173 (+) | TGCGCGCTAGTAAAGC
V$ZF5_01 | 174 (+) | GCGCGCta
V$PAX2_01 | 178 (+) | gctaGTAAAGcatgatgcc
V$TAXCREB_02 | 189 (+) | aTGATGCCTCTCTCA
V$FXR_IR1_Q6 | 208 (-) | gGGACATTCATCC
V$HIF1_Q3 | 234 (-) | gcccGCGCGTccag
V$HIF1_Q5 | 235 (-) | cccgCGCGTcca
V$ZF5_01 | 236 (-) | ccGCGCGT
V$E2F_Q2 | 237 (+) | CGCGcg
V$E2F_Q2 | 237 (-) | cgCGCG
V$SREBP1_Q6 | 256 (+) | CACACCA
V$CETS1P54_02 | 260 (+) | ccaaaGGAtataa
V$CMAF_01 | 270 (-) | taactccgCCAGCAcattt
V$E2F1DP1RB_01 | 285 (+) | ATTTGCGC
V$E2F4DP1_01 | 285 (+) | ATTTGCGC
V$E2F_03 | 285 (+) | ATTTGCGCcaga
V$E2F_Q3 | 285 (+) | ATTTGCGC
V$E2F_03 | 285 (-) | atttGCGCCAGA
V$E2F_Q6_01 | 286 (+) | tttgCGCCAGag
V$E2F1DP1RB_01 | 289 (-) | GCGCCAGA
V$E2F1_Q6 | 289 (-) | gCGCCAGa
V$E2F4DP1_01 | 289 (-) | GCGCCAGA
V$E2F_02 | 289 (-) | GCGCCAGA
V$E2F_Q3 | 289 (-) | GCGCCAGA
V$E2F_Q4 | 289 (-) | gCGCCAGA
V$E2F_Q6 | 289 (-) | gCGCCAGA
>T.rubripes
V$XPF1_Q6 | 3 (+) | TCTGGGGACG
V$ZF5_B | 5 (+) | tggggaCGCGTtc
V$NRF1_Q6 | 5 (-) | tGGGGACGCG
V$WHN_B | 6 (+) | ggggACGCgtt
V$MYOD_Q6_01 | 14 (-) | gttcagCACATGctcgcg
V$MYCMAX_01 | 16 (+) | tcAGCACATGCTcg
V$MYCMAX_01 | 16 (-) | tcAGCACATGCTcg
V$MYOD_01 | 17 (-) | cagCACATGctc
V$MYCMAX_B | 18 (-) | agCACATGct
V$AHRARNT_02 | 19 (-) | GCACATGCTCGCGCTCTCC
V$NRF1_Q6 | 20 (+) | CACATGCTCg
V$ZF5_B | 22 (+) | catgctCGCGCtc
V$ZF5_B | 23 (-) | atGCTCGcgctct
V$ZF5_01 | 27 (-) | tcGCGCTC
V$SRF_Q4 | 33 (-) | tctccgtCCCTGTATGGg
V$SRF_Q5_02 | 35 (+) | tccgtCCCTGTATGGgttg
V$E2_Q6_01 | 37 (+) | cgtCCCTGTATGGGTt
V$E2_01 | 38 (-) | gtCCCTGTATGGGTtg
V$SRF_Q6 | 38 (-) | gtCCCTGTATGGgt
V$SRF_C | 39 (+) | tCCCTGTATGGGTTg
V$AIRE_01 | 40 (+) | ccctgtatgGGTTGACAAGGaaaaaa
V$COMP1_01 | 43 (+) | tgtatgGGTTGACAAGGAaaaaaa
V$VDR_Q6 | 48 (-) | gGGTTGAcaagg
V$HELIOSA_02 | 54 (+) | acaAGGAAAAA
V$BEL1_B | 57 (-) | agGAAAAAAACTTCCCTGTCAGTCGGTt
V$POLY_C | 59 (+) | gAAAAAAACTTCCCTGTc
V$PAX6_Q2 | 65 (-) | aACTTCCCTGTCAG
V$MEIS1_01 | 69 (-) | tccCTGTCAgtc
V$SOX9_B1 | 88 (-) | attcATTGTTgtct
V$SMAD_Q6_01 | 96 (-) | ttGTCTGtcca
V$SMAD3_Q6 | 97 (+) | tGTCTGTCC
V$NFY_Q6_01 | 102 (+) | gtccagCCAATca
V$CAAT_01 | 103 (+) | tccagCCAATca
V$NFY_01 | 103 (+) | tccagCCAATcatggt
V$NFY_C | 103 (-) | tccAGCCAATCAtg
V$ALPHACP1_01 | 105 (+) | CAGCCAATCAT
V$NFY_Q6 | 105 (+) | cagCCAATcat
V$ACAAT_B | 105 (-) | CAGCCAATc
V$CDP_01 | 108 (+) | CCAATCATGGTT
V$COMP1_01 | 113 (+) | catggtTTTTGACGACACaaaagc
V$ATF1_Q6 | 119 (+) | TTTTGACGACA
V$CREBATF_Q6 | 121 (+) | tTGACGaca
V$CREB_Q3 | 121 (-) | tTGACG
V$FOXM1_01 | 143 (+) | AGTTGGAGT
V$MTATA_B | 148 (+) | gagTATAAAaaggtgcg
V$TATA_C | 149 (+) | aGTATAAAAa
V$TATA_01 | 150 (+) | gTATAAAaaggtgcg
V$TBP_Q6 | 150 (-) | gtATAAA
V$HOX13_01 | 155 (-) | aAAAGGTGCGCGCTAATAAAGCATGATGCc
V$ZF5_B | 157 (+) | aaggtgCGCGCta
V$E2F_03 | 160 (-) | gtgcGCGCTAAT
V$E2F_Q6_01 | 161 (+) | tgcgCGCTAAta
V$GZF1_01 | 161 (+) | TGCGCGCTAATA
V$LXR_DR4_Q3 | 161 (+) | TGCGCGCTAATAAAGC
V$E2F_Q4_01 | 162 (+) | gcgCGCTAATa
V$ZF5_01 | 162 (+) | GCGCGCta
V$CHX10_01 | 163 (-) | cgcGCTAATAAagc
V$E2F1_Q4_01 | 163 (-) | cgCGCTAAT
V$E2F1DP1RB_01 | 164 (-) | GCGCTAAT
V$E2F4DP1_01 | 164 (-) | GCGCTAAT
V$E2F_Q3 | 164 (-) | GCGCTAAT
V$PAX2_01 | 166 (+) | gctaATAAAGcatgatgcc
V$LPOLYA_B | 168 (+) | tAATAAAG
V$IPF1_Q4_01 | 193 (+) | tgggaCATTAatcca
V$FXR_IR1_Q6 | 194 (-) | gGGACATTAATCC
V$IPF1_Q4 | 195 (-) | ggACATTAATCC
V$PITX2_Q2 | 199 (+) | atTAATCCAaa
V$SP1_01 | 209 (-) | acCCAGCCca
V$E2F_03 | 221 (-) | ctgcGCGTCAGA
V$CREB_Q3 | 226 (+) | CGTCAg
V$AHR_Q5 | 237 (-) | gaaCACGCcaa
V$SREBP1_Q6 | 240 (+) | CACGCCA
V$E2F1_Q4_01 | 240 (-) | caCGCCAAG
V$E2F_Q3_01 | 240 (-) | caCGCCAAG
V$MEF2_02 | 251 (-) | atataCTTTTTATAGaacgcat
V$MEF2_03 | 251 (-) | atataCTTTTTATAGaacgcat
V$NKX3A_01 | 251 (-) | atATACTTTtta
V$RSRFC4_01 | 253 (+) | ataCTTTTTATAGaac
V$TATA_C | 257 (-) | tTTTTATAGa
V$WHN_B | 263 (+) | tagaACGCatt
V$TAXCREB_02 | 264 (+) | aGAACGCATTTCCAC
V$XBP1_01 | 270 (-) | catttcCACGTCTtcag
V$ATF6_01 | 275 (-) | CCACGTCT
>O.niloticus
V$E2F_03 | 8 (-) | tatcCCGTCAAG
V$E2F_Q6_01 | 9 (+) | atccCGTCAAgc
V$E2F_Q4_01 | 10 (+) | tccCGTCAAGc
V$CREB_Q3 | 13 (+) | CGTCAa
V$TAXCREB_02 | 14 (+) | gTCAAGCACATGCCC
V$MYCMAX_01 | 16 (+) | caAGCACATGCCca
V$MYCMAX_01 | 16 (-) | caAGCACATGCCca
V$MYCMAX_02 | 17 (+) | aAGCACATGccc
V$ZF5_B | 17 (-) | aaGCACAtgccca
V$MYCMAX_B | 18 (-) | agCACATGcc
V$EBOX_Q6_01 | 19 (+) | gCACATGccc
V$P53_DECAMER_Q2 | 19 (-) | gcaCATGccc
V$NRF1_Q6 | 20 (+) | CACATGCCCa
V$CACD_01 | 27 (+) | CCACAGCC
V$TAXCREB_01 | 45 (+) | atGGGTTGACAgcga
V$SREBP_Q3 | 46 (-) | TGGGTTGAcagc
V$VDR_Q6 | 47 (-) | gGGTTGAcagcg
V$E2F_03 | 50 (-) | ttgaCAGCGAAA
V$E2F_Q3 | 54 (-) | CAGCGAAA
V$POLY_C | 58 (-) | gAAAAAAAAGTTTTCATg
V$PPARG_03 | 77 (+) | cagtcGGTTAAAATTCA
V$HNF4ALPHA_Q6 | 82 (-) | ggtTAAAATTCAt
V$AHRARNT_02 | 92 (+) | CATTGTTGCCTGTCCAGCC
V$RFX1_01 | 94 (-) | ttGTTGCCTGTCCAGcc
V$NFY_Q6_01 | 103 (+) | gtccagCCAATca
V$CAAT_01 | 104 (+) | tccagCCAATca
V$NFY_01 | 104 (+) | tccagCCAATcataga
V$NFY_C | 104 (-) | tccAGCCAATCAta
V$ALPHACP1_01 | 106 (+) | CAGCCAATCAT
V$NFY_Q6 | 106 (+) | cagCCAATcat
V$ACAAT_B | 106 (-) | CAGCCAATc
V$CDP_01 | 109 (+) | CCAATCATAGAT
V$PAX3_01 | 116 (-) | tagaTTTTGACGA
V$ATF1_Q6 | 120 (+) | TTTTGACGACA
V$CREBATF_Q6 | 122 (+) | tTGACGaca
V$CREB_Q3 | 122 (-) | tTGACG
V$FOXM1_01 | 144 (+) | AGTTGGAGT
V$MTATA_B | 149 (+) | gagTATAAAaaggtgcg
V$TATA_C | 150 (+) | aGTATAAAAa
V$TATA_01 | 151 (+) | gTATAAAaaggtgcg
V$TBP_Q6 | 151 (-) | gtATAAA
V$ZF5_B | 158 (+) | aaggtgCGCGCta
V$AHRARNT_01 | 161 (-) | gtgCGCGCtaataaac
V$E2F_03 | 161 (-) | gtgcGCGCTAAT
V$E2F_Q6_01 | 162 (+) | tgcgCGCTAAta
V$GZF1_01 | 162 (+) | TGCGCGCTAATA
V$LXR_DR4_Q3 | 162 (+) | TGCGCGCTAATAAACT
V$E2F_Q4_01 | 163 (+) | gcgCGCTAATa
V$ZF5_01 | 163 (+) | GCGCGCta
V$CHX10_01 | 164 (-) | cgcGCTAATAAact
V$E2F1_Q4_01 | 164 (-) | cgCGCTAAT
V$E2F1DP1RB_01 | 165 (-) | GCGCTAAT
V$E2F4DP1_01 | 165 (-) | GCGCTAAT
V$E2F_Q3 | 165 (-) | GCGCTAAT
V$LMO2COM_02 | 183 (-) | gccTATCag
V$IPF1_Q4_01 | 194 (+) | tgggaCATTAatcca
V$FXR_IR1_Q6 | 195 (-) | gGGACATTAATCC
V$IPF1_Q4 | 196 (-) | ggACATTAATCC
V$PITX2_Q2 | 200 (+) | atTAATCCAac
V$HNF4_Q6_02 | 214 (+) | AGTTCA
V$PAX8_B | 217 (+) | tcagtcgcGCATCagctc
V$NRF1_Q6 | 222 (-) | cGCGCATCAG
V$HMGIY_Q3 | 246 (+) | aaaggATTTTttttt
V$AMEF2_Q6 | 249 (-) | ggaTTTTTTTTTAaacaa
V$HMEF2_Q6 | 249 (-) | gGATTTTTTTTTAaac
V$MEF2_01 | 249 (-) | gGATTTTTTTTTAAAc
V$MMEF2_Q6 | 251 (-) | attttTTTTTAaacaa
V$HTF_01 | 258 (+) | tttaaacAAAACGTATttttaaac
V$SRY_02 | 259 (+) | ttaAACAAaacg
V$SRY_01 | 261 (+) | AAACaaa
V$PAX4_04 | 265 (+) | aAAACGTATTTTTAAACCACACTTCACACc
V$AMEF2_Q6 | 266 (-) | aaaCGTATTTTTAaacca
V$HMEF2_Q6 | 266 (-) | aAACGTATTTTTAaac
V$MEF2_01 | 266 (-) | aAACGTATTTTTAAAc
V$MMEF2_Q6 | 268 (-) | acgtaTTTTTAaacca
V$HOXA3_01 | 269 (+) | cgTattttt
V$CBF_02 | 275 (-) | tttaaaCCACacttca
V$AML1_01 | 280 (-) | ACCACA
V$AML1_Q6 | 280 (-) | ACCACA
V$TITF1_Q3 | 283 (-) | acACTTCACA
V$NKX25B_1 | 284 (-) | CACTTca
V$PAX3_01 | 285 (+) | ACTTCACACctaa
V$TBX5_01 | 286 (-) | ctTCACACCTaa
V$TBX5_Q5 | 287 (+) | tTCACACCTa
V$DELTAEF1_01 | 288 (+) | tcaCACCTaag
V$TBX5B_01 | 288 (-) | tcACACCt
V$TBX5_02 | 288 (-) | tcACACCtaa
>O.latipes
V$NRF1_Q6 | 1 (+) | CATTTGCGCg
V$E2F_Q6_01 | 1 (-) | caTTTGCGcgct
V$E2F1DP1RB_01 | 2 (+) | ATTTGCGC
V$E2F4DP1_01 | 2 (+) | ATTTGCGC
V$E2F_Q3 | 2 (+) | ATTTGCGC
V$E2F1_Q6_01 | 3 (+) | tTTGCGCGct
V$E2F_Q4_01 | 3 (-) | tTTGCGCGctc
V$E2F_Q6_01 | 3 (-) | ttTGCGCGctcg
V$E2F1DP1RB_01 | 4 (+) | TTGCGCGC
V$E2F1_Q4_01 | 4 (+) | TTGCGCGct
V$E2F4DP1_01 | 4 (+) | TTGCGCGC
V$E2F_02 | 4 (+) | TTGCGCGC
V$E2F_03 | 4 (+) | TTGCGCGCtcgc
V$E2F_Q3 | 4 (+) | TTGCGCGC
V$E2F_Q3_01 | 4 (+) | TTGCGCGct
V$E2F_Q4 | 4 (+) | TTGCGCGc
V$E2F_Q6 | 4 (+) | TTGCGCGc
V$ZF5_01 | 4 (-) | ttGCGCGC
V$ZF5_B | 4 (-) | ttGCGCGctcgct
V$ZF5_B | 5 (+) | tgcgcgCTCGCtc
V$NRF1_Q6 | 5 (-) | tGCGCGCTCG
V$VMAF_01 | 6 (+) | gcgcGCTCGCTCAGCacat
V$VMAF_01 | 6 (-) | gcgcGCTCGCTCAGCacat
V$MYCMAX_02 | 17 (+) | cAGCACATGtgt
V$MYOD_01 | 17 (-) | cagCACATGtgt
V$MYOD_01 | 19 (+) | gcaCATGTGtct
V$TFE_Q6 | 19 (-) | gCACATGt
V$SMAD4_Q6 | 23 (-) | aTGTGTCTCCACGCT
V$PAX3_01 | 28 (+) | TCTCCACGCtttg
V$WHN_B | 29 (+) | ctccACGCttt
V$COMP1_01 | 30 (+) | tccacgCTTTGACAGCGAaaaact
V$LEF1_Q2 | 36 (-) | CTTTGA
V$E2F_03 | 38 (-) | ttgaCAGCGAAA
V$E2F_Q3 | 42 (-) | CAGCGAAA
V$POLY_C | 42 (-) | cAGCGAAAAACTTTTTTc
V$MYOD_Q6 | 63 (-) | gcCAGATGgt
V$RP58_01 | 63 (-) | gCCAGATGGTta
V$TAL1_Q6 | 63 (-) | GCCAGATGGt
V$GATA1_01 | 64 (+) | ccaGATggtt
V$PPARG_03 | 65 (+) | cagatGGTTAAAATTCA
V$HNF4_01 | 66 (+) | agatGGTTAAAATTCAttg
V$MMEF2_Q6 | 68 (+) | atggtTAAAATtcatt
V$COUP_01 | 68 (-) | atGGTTAAAATTCA
V$HNF4ALPHA_Q6 | 70 (-) | ggtTAAAATTCAt
V$NFY_Q6_01 | 91 (+) | gtccagCCAATca
V$CAAT_01 | 92 (+) | tccagCCAATca
V$NFY_01 | 92 (+) | tccagCCAATcattga
V$NFY_C | 92 (-) | tccAGCCAATCAtt
V$ALPHACP1_01 | 94 (+) | CAGCCAATCAT
V$NFY_Q6 | 94 (+) | cagCCAATcat
V$ACAAT_B | 94 (-) | CAGCCAATc
V$CDP_01 | 97 (+) | CCAATCATTGAT
V$PBX1_03 | 99 (-) | aatCATTGATtt
V$HNF6_Q6 | 101 (-) | tcATTGATTTtg
V$PAX3_01 | 104 (-) | ttgaTTTTGACGA
V$ATF1_Q6 | 108 (+) | TTTTGACGACA
V$CREBATF_Q6 | 110 (+) | tTGACGaca
V$CREB_Q3 | 110 (-) | tTGACG
V$FOXM1_01 | 125 (+) | AGCTGGAGT
V$MTATA_B | 130 (+) | gagTATAAAaaggtgcg
V$TATA_C | 131 (+) | aGTATAAAAa
V$TATA_01 | 132 (+) | gTATAAAaaggtgcg
V$TBP_Q6 | 132 (-) | gtATAAA
V$ZF5_B | 139 (+) | aaggtgCGCGCtg
V$GZF1_01 | 143 (+) | TGCGCGCTGATA
V$ZF5_01 | 144 (+) | GCGCGCtg
V$GATA1_05 | 148 (+) | gctGATAAag
V$GATA2_03 | 158 (-) | TATGATCtct
V$GATA3_02 | 158 (-) | taTGATCtct
V$GATA3_03 | 158 (-) | TATGATCtct
V$ZTA_Q2 | 169 (+) | tcagagTGGCTCA
V$ZID_01 | 175 (+) | tGGCTCATTTATC
V$FXR_IR1_Q6 | 176 (-) | gGCTCATTTATCC
V$CMYB_01 | 186 (+) | tccaagCACGGTTACttg
V$DEAF1_01 | 187 (+) | cCAAGCACGGTTACTTGCGgatcag
V$SEF1_C | 190 (+) | AGCACGGTTACTTGCGGAt
V$ZEC_01 | 192 (+) | CACGGTTACTTGC
V$CBF_01 | 216 (-) | actcttCCACaaagga
V$TATA_C | 244 (+) | tCTTTAAAAa
V$TAACC_B | 250 (+) | aAAAAAAAAGTCAAACAAACAag
V$RORA1_01 | 251 (+) | aaaaaaAAGTCAa
V$HNF4_Q6 | 256 (+) | aaaGTCAAa
V$HNF3ALPHA_Q6 | 260 (-) | tcaaacAAACA
V$HFH3_01 | 261 (-) | cAAACAAACAagc
V$HFH8_01 | 261 (-) | caaACAAACAagc
V$SRY_01 | 262 (+) | AAACaaa
V$FOXD3_01 | 262 (-) | aAACAAACAagc
V$PPARA_01 | 267 (+) | AACAAGCAGAACAAACGTCA
V$PR_01 | 268 (-) | acaagcAGAACAAACGTCACacctcag
V$PPARG_03 | 270 (+) | aagcaGAACAAACGTCA
V$HNF4_01_B | 273 (+) | caGAACAAACGTCAc
V$DR1_Q3 | 274 (+) | aGAACAAACGTCA
V$GR_Q6_01 | 274 (-) | aGAACAaa
V$HNF4_DR1_Q3 | 274 (-) | aGAACAAACGTCA
V$PPAR_DR1_Q2 | 274 (-) | aGAACAAACGTCa
V$ATF_01 | 276 (-) | aacaaACGTCAcac
V$ATF_B | 276 (-) | aacaaACGTCAc
V$CREB_Q2 | 277 (-) | acaAACGTCAca
V$CREB_Q4 | 277 (-) | acAAACGTCAca
V$E4F1_Q6 | 278 (+) | caAACGTCAC
V$CREBATF_Q6 | 279 (-) | aaaCGTCAc
V$CREBP1CJUN_01 | 279 (-) | AAACGTCA
V$PAX3_01 | 281 (+) | ACGTCACACctca
V$CREB_Q3 | 282 (+) | CGTCAc
V$TBX5_01 | 282 (-) | cgTCACACCTca
V$TBX5_Q5 | 283 (+) | gTCACACCTc
V$TBX5B_01 | 284 (-) | tcACACCt
V$TBX5_02 | 284 (-) | tcACACCtca
>P.formosa
V$EVI1_04 | 3 (-) | TTTTTTATCCTGTTt
V$CETS1P54_02 | 5 (-) | ttttaTCCtgttt
V$EVI1_06 | 7 (-) | TTATCCTGT
V$MEIS1_01 | 14 (+) | gttTGACAGatg
V$MYOD_Q6 | 18 (-) | gaCAGATGtt
V$RP58_01 | 18 (-) | gACAGATGTTtc
V$RBPJK_01 | 26 (-) | tTTCACATGct
V$USF_C | 28 (+) | tCACATGc
V$TFE_Q6 | 28 (-) | tCACATGc
V$AP1_C | 50 (-) | cTGATTCAt
V$FOXJ2_01 | 60 (+) | taataaAAAAATAttcca
V$FOX_Q2 | 63 (-) | tAAAAAAATAttc
V$HNF3B_01 | 63 (-) | tAAAAAAATATTcca
V$FOXD3_01 | 64 (-) | aAAAAAATAttc
V$CBF_01 | 69 (-) | aatattCCACtctgtt
V$AREB6_04 | 80 (+) | ctGTTTgaa
V$CDPCR1_01 | 87 (+) | aATCCATcgt
V$ETS1_B | 89 (-) | tcCATCGTTTCCTCt
V$NFY_Q6_01 | 102 (+) | ctccagCCAATca
V$CAAT_01 | 103 (+) | tccagCCAATca
V$NFY_01 | 103 (+) | tccagCCAATcatggt
V$NFY_C | 103 (-) | tccAGCCAATCAtg
V$ALPHACP1_01 | 105 (+) | CAGCCAATCAT
V$NFY_Q6 | 105 (+) | cagCCAATcat
V$ACAAT_B | 105 (-) | CAGCCAATc
V$CDP_01 | 108 (+) | CCAATCATGGTT
V$RFX1_02 | 115 (-) | tgGTTTCTGTTGCCACgt
V$BRCA_01 | 119 (+) | ttctGTTG
V$MIF1_01 | 120 (-) | tctGTTGCCACGTAACag
V$MIF1_01 | 121 (+) | ctGTTGCCACGTAACagg
V$RFX1_01 | 121 (+) | ctGTTGCCACGTAACag
V$RFX_Q6 | 121 (+) | ctGTTGCca
V$RFX1_01 | 121 (-) | ctGTTGCCACGTAACag
V$ARNT_01 | 123 (+) | gttgcCACGTAacagg
V$EFC_Q6 | 123 (-) | gTTGCCACGtaaca
V$E2F1_Q3_01 | 124 (+) | ttgCCACGTAACAGgc
V$E4F1_Q6 | 126 (+) | gcCACGTAAC
V$USF_Q6 | 126 (-) | gcCACGTAac
V$ATF6_01 | 127 (-) | CCACGTAA
V$PPARG_03 | 132 (+) | taacaGGCTAAAGTTGG
V$FOXM1_01 | 143 (+) | AGTTGGAGT
V$MTATA_B | 148 (+) | gagTATAAAaagctgcg
V$TATA_C | 149 (+) | aGTATAAAAa
V$MTATA_B | 150 (+) | gtaTAAAAAgctgcgcg
V$TATA_01 | 150 (+) | gTATAAAaagctgcg
V$TBP_Q6 | 150 (-) | gtATAAA
V$BARBIE_01 | 152 (+) | ataaAAAGCTGCGCG
V$ZBRK1_01 | 154 (-) | AAAAAGCTGCGCGCA
V$ZF5_B | 157 (+) | aagctgCGCGCaa
V$AHRARNT_01 | 160 (-) | ctgCGCGCaaataaat
V$E2F_03 | 160 (-) | ctgcGCGCAAAT
V$ZF5_01 | 160 (-) | ctGCGCGC
V$E2F_Q6_01 | 161 (+) | tgcgCGCAAAta
V$GZF1_01 | 161 (+) | TGCGCGCAAATA
V$E2F_Q4_01 | 162 (+) | gcgCGCAAATa
V$ZF5_01 | 162 (+) | GCGCGCaa
V$E2F1DP1RB_01 | 162 (-) | GCGCGCAA
V$E2F4DP1_01 | 162 (-) | GCGCGCAA
V$E2F_02 | 162 (-) | GCGCGCAA
V$E2F_Q3 | 162 (-) | GCGCGCAA
V$E2F_Q4 | 162 (-) | gCGCGCAA
V$E2F_Q6 | 162 (-) | gCGCGCAA
V$E2F1DP1RB_01 | 164 (-) | GCGCAAAT
V$E2F4DP1_01 | 164 (-) | GCGCAAAT
V$E2F_Q3 | 164 (-) | GCGCAAAT
V$POU6F1_01 | 168 (+) | AAATAAATTAT
V$POU6F1_01 | 170 (-) | ATAAATTATGA
V$NKX25L_01 | 173 (-) | AATTAtg
V$WHN_B | 176 (+) | tatgACGCccg
V$BACH2_01 | 176 (-) | taTGACGCCcg
V$CREBATF_Q6 | 177 (+) | aTGACGccc
V$CREB_Q3 | 177 (-) | aTGACG
V$HIF1_Q3 | 178 (-) | tgacGCCCGTcagc
V$PAX9_B | 178 (-) | tgacgcCCGTCAGCGCTGCTCatt
V$ATF_01 | 179 (-) | gacgcCCGTCAgcg
V$CREB_Q3 | 185 (+) | CGTCAg
V$E2F_01 | 197 (-) | tcaTTTTCCCACGCA
V$IK1_01 | 198 (-) | cattTTCCCacgc
V$BRACH_01 | 199 (-) | aTTTTCCCACGCAGCTCCGAggcg
V$E2F1_Q6_01 | 200 (+) | tTTTCCCAcg
V$E2F1DP1_01 | 201 (+) | tTTCCCAC
V$E2F_03 | 201 (+) | TTTCCCACgcag
V$EGR3_01 | 201 (-) | tTTCCCACGCag
V$RBPJK_01 | 201 (-) | tTTCCCACGca
V$RBPJK_Q4 | 202 (+) | TTCCCACg
V$AHRHIF_Q6 | 203 (-) | tccCACGca
V$AHR_01 | 203 (-) | tccCACGCAGCTCCGagg
V$AHR_Q5 | 203 (-) | tccCACGCagc
V$PAX4_01 | 212 (-) | gctccgaGGCGCATCACGTCg
V$GATA1_01 | 220 (-) | gcgcATCacg
V$AHRHIF_Q6 | 223 (-) | catCACGtc
V$CBF_01 | 229 (+) | gtcgcaGCGGatcttt
V$DEC_Q1 | 252 (-) | cgtTCACCTGaag
V$AREB6_02 | 253 (+) | gttCACCTgaag
V$DEC_Q1 | 253 (+) | gttCACCTGAagc
V$DELTAEF1_01 | 253 (+) | gttCACCTgaa
V$SREBP1_01 | 253 (+) | gTTCACCTGAa
V$XPF1_Q6 | 253 (-) | GTTCACCTGA
Coelacanth extended core promoter
>L.chalumnae
V$NRF1_Q6 | 2 (+) | CGTATGCACa
V$SRF_01 | 5 (+) | ATGCACAAATAGGGcacc
V$SRF_C | 5 (-) | aTGCACAAATAGGGc
V$SRF_Q6 | 7 (+) | gcACAAATAGGGca
V$XVENT1_01 | 7 (-) | gcaCAAATagggc
V$SRF_Q4 | 8 (+) | cACAAATAGGGcacccct
V$SRF_Q5_01 | 9 (+) | ACAAATAGGGcaccc
V$HIC1_03 | 9 (-) | acaaataggGCAcccctg
V$HOXA3_01 | 9 (-) | acaaatAgg
V$MSX1_01 | 10 (-) | CAAATAggg
V$ZF5_B | 14 (-) | taGGGCAcccctg
V$ROAZ_01 | 18 (+) | GCACCCCTGGATGt
V$ROAZ_01 | 18 (-) | gCACCCCTGGATGT
V$MUSCLE_INI_B | 19 (-) | cacccctggaTGtgggcacaa
V$HES1_Q2 | 30 (-) | gtgggCACAAGagtg
V$PAX3_B | 33 (-) | ggcacaAGAGTGAAgctgtct
V$SMAD_Q6 | 45 (-) | aagctGTCT
V$TGIF_01 | 46 (+) | AGCTGTCTAGA
V$COMP1_01 | 55 (+) | gagattGATTGGCAGCCAgggatc
V$CDPCR1_01 | 55 (-) | gagATTGATt
V$FOXM1_01 | 56 (+) | AGATTGATT
V$GATA1_03 | 56 (+) | agattGATTGGCAg
V$HOXA7_01 | 56 (-) | AGATTGa
V$CDPCR1_01 | 57 (+) | gATTGATtgg
V$CDPCR3HD_01 | 57 (+) | gATTGATtgg
V$PBX_Q3 | 57 (+) | GATTGAttggca
V$NFY_C | 58 (+) | atTGATTGGCAgcc
V$NFY_Q6_01 | 60 (-) | tgATTGGcagcca
V$ACAAT_B | 61 (+) | gATTGGCAG
V$NFKAPPAB50_01 | 72 (+) | AGGGATCTCC
V$NFKAPPAB_01 | 73 (+) | GGGATCTCCC
V$NFKAPPAB_01 | 73 (-) | GGGATCTCCC
V$MEIS1_01 | 83 (+) | ttcTGACAGctg
V$TGIF_01 | 83 (-) | TTCTGACAGCT
V$AP4_Q6_01 | 87 (+) | gaCAGCTGa
V$MYOGENIN_Q6 | 87 (+) | gaCAGCTG
V$CDP_01 | 96 (-) | ATTCATTGTTGG
V$HNF3_Q6_01 | 97 (+) | ttcatTGTTGgcactgca
V$ACAAT_B | 99 (+) | cATTGTTGG
V$AHRARNT_02 | 106 (-) | GGCACTGCAGCCAATCACC
V$NFY_Q6_01 | 110 (+) | ctgcagCCAATca
V$CAAT_01 | 111 (+) | tgcagCCAATca
V$NFY_01 | 111 (+) | tgcagCCAATcaccga
V$NFY_C | 111 (-) | tgcAGCCAATCAcc
V$ALPHACP1_01 | 113 (+) | CAGCCAATCAC
V$NFY_Q6 | 113 (+) | cagCCAATcac
V$ACAAT_B | 113 (-) | CAGCCAATc
V$CAAT_C | 115 (+) | gCCAATCACCGATTTTGACGACACA
V$CDP_01 | 116 (+) | CCAATCACCGAT
V$NCX_01 | 116 (-) | ccaaTCAccg
V$ATF1_Q6 | 127 (+) | TTTTGACGACA
V$CREBATF_Q6 | 129 (+) | tTGACGaca
V$CREB_Q3 | 129 (-) | tTGACG
V$IRF1_01 | 138 (+) | caATAGTGTAAcc
V$HLF_01 | 140 (-) | aTAGTGTAAc
V$RSRFC4_01 | 157 (-) | gagGTATAAAAAGccc
V$MMEF2_Q6 | 158 (+) | aggtaTAAAAAgccct
V$MTATA_B | 158 (+) | aggTATAAAaagccctg
V$GRE_C | 159 (+) | gGTATAAAAAGCCCTg
V$TATA_C | 159 (+) | gGTATAAAAa
V$TATA_01 | 160 (+) | gTATAAAaagccctg
V$TBP_Q6 | 160 (-) | gtATAAA
V$CBF_02 | 193 (+) | atcagtGTGGtgagaa
V$SREBP1_02 | 197 (-) | GTGTGGTGAGa
V$AML1_01 | 198 (+) | TGTGGT
V$AML1_Q6 | 198 (+) | TGTGGT
V$OCT4_01 | 208 (-) | aTCTACAATTCAAtg
V$FOXO4_01 | 228 (+) | atCAACAagca
V$ATATA_B | 243 (+) | gTATATAAGc
V$TATA_01 | 243 (+) | gTATATAagctaagt
V$GZF1_01 | 244 (-) | TATATAAGCTAA
V$IRF1_Q6 | 254 (-) | AAGTGAA
V$OTX_Q1 | 277 (-) | ACTTAATC
V$RBPJK_01 | 282 (+) | atCGTGTGAAc
Amphibia extended core promoter
>X.tropicalis
V$SRF_01 | 4 (-) | tatgCTATATAAGGGTTT
V$SRF_Q5_02 | 4 (-) | tatgCTATATAAGGgtttg
V$SRF_Q6 | 6 (+) | tgCTATATAAGGgt
V$SRF_C | 7 (+) | gCTATATAAGGGTTt
V$ATATA_B | 8 (+) | cTATATAAGg
V$SRF_Q5_01 | 8 (+) | CTATATAAGGgtttg
V$TATA_01 | 8 (+) | cTATATAagggtttg
V$RUSH1A_02 | 10 (-) | atATAAGggt
V$RREB1_01 | 16 (-) | gGGTTTGCTTGTGT
V$OCT4_02 | 23 (+) | cTTGTGTTTCAAAtg
V$GATA2_02 | 34 (+) | aatGATAAgt
V$GATA6_01 | 34 (+) | aatGATaagt
V$GATA_C | 36 (+) | tGATAAgttcc
V$GATA_Q6 | 36 (+) | tGATAag
V$HNF1_C | 50 (-) | atggCAATTAATTGCCt
V$HNF1_C | 51 (+) | tGGCAATTAATTGcctg
V$CDPCR1_01 | 53 (-) | gcaATTAATt
V$CDPCR1_01 | 55 (+) | aATTAATtgc
V$SMAD3_Q6 | 62 (+) | tGCCTGTCT
V$PAX2_01 | 63 (+) | gcctGTCTTGcacgactga
V$CEBPB_02 | 67 (+) | gtcTTGCACGActg
V$CAP_01 | 74 (-) | acgacTGa
V$SMAD_Q6_01 | 82 (-) | gaGTCTGcatt
V$HEB_Q6 | 95 (+) | gCCAGCTG
V$MYOGENIN_Q6 | 95 (+) | gcCAGCTG
V$TAL1_Q6 | 95 (-) | GCCAGCTGGa
V$LBP1_Q6 | 96 (-) | cCAGCTG
V$LBP1_Q6 | 97 (+) | CAGCTGg
V$HEB_Q6 | 97 (-) | CAGCTGGa
V$NF1_Q6 | 112 (-) | tctgtgtgacaGCCAAtc
V$NF1_Q6_01 | 113 (+) | ctgtgtgacaGCCAAtc
V$NFY_Q6_01 | 118 (+) | tgacagCCAATcg
V$CAAT_01 | 119 (+) | gacagCCAATcg
V$NFY_01 | 119 (+) | gacagCCAATcgctgg
V$NFY_Q6 | 121 (+) | cagCCAATcgc
V$ACAAT_B | 121 (-) | CAGCCAATc
V$AP4_01 | 121 (-) | caGCCAATCGCTGgctct
V$HOXA7_01 | 124 (+) | cCAATCG
V$CDPCR1_01 | 126 (+) | aATCGCTggc
V$IPF1_Q4_01 | 133 (-) | ggctcTGATGacaca
V$FREAC4_01 | 134 (-) | gctcTGATGACACAAG
V$ATF1_Q6 | 135 (+) | CTCTGATGACA
V$EVI1_01 | 138 (+) | tGATGACACAAGAGAA
V$BACH2_01 | 139 (-) | gaTGACACAag
V$NRF2_Q4 | 139 (-) | gaTGACACAAGAg
V$AP1_Q6_01 | 140 (+) | aTGACACAa
V$AP1_Q4_01 | 140 (-) | aTGACACA
V$ISRE_01 | 143 (-) | acaCAAGAGAAACTc
V$IRF1_01 | 144 (+) | caCAAGAGAAAct
V$EVI1_06 | 145 (+) | ACAAGAGAA
V$IRF_Q6 | 145 (-) | acAAGAGAAActcaa
V$TITF1_Q3 | 154 (+) | ACTCAAGTtg
V$FOXM1_01 | 159 (+) | AGTTGGACT
V$TATA_C | 165 (+) | aCTATAAAAg
V$GZF1_01 | 167 (-) | TATAAAAGTTCA
V$HNF4_Q6_02 | 173 (+) | AGTTCA
V$DEC_Q1 | 173 (-) | agtTCACTTGgaa
V$IRF1_Q6 | 175 (+) | TTCACTT
V$STAT5A_03 | 181 (-) | tgGAAata
V$STAT6_01 | 181 (-) | tgGAAata
V$PAX4_04 | 188 (-) | aGCATGATTTATCATGGAGAGGTATTTTCt
V$POU6F1_01 | 189 (+) | GCATGATTTAT
V$GATA_C | 191 (-) | atgatTTATCa
V$CDC5_01 | 193 (+) | GATTTATCATGg
V$PAX4_04 | 203 (-) | gGAGAGGTATTTTCTTCTTCACTTTTTATt
V$IRF1_Q6 | 220 (+) | TTCACTT
V$CDX_Q5 | 227 (-) | TTTATTTCTGTAACTGTt
V$MSX1_01 | 234 (+) | ctgTAACTG
V$VMYB_02 | 235 (+) | tgtAACTGt
V$STAT1_01 | 243 (+) | ttggcaTTACCAGAAatagaa
V$MEF2_02 | 245 (+) | ggcattaCCAGAAATAGaaaat
V$MEF2_04 | 245 (+) | ggCATTACCAGAAATAGAAaat
V$IK3_01 | 245 (-) | gGCATTACCagaa
V$STAT_01 | 249 (+) | TTACCAGAA
V$STAT_Q6 | 250 (-) | TACCAGAAataga
V$HMGIY_Q3 | 258 (-) | atagaAAATTgaatt
V$IRF7_01 | 259 (+) | taGAAAATTGAATTATAT
V$TEF_Q6 | 271 (-) | TTATATGACTAT
V$ATATA_B | 279 (+) | cTATATAAGa
Sauropsida promoter
>G.japonicus
V$STRA13_01 | 4 (+) | tcaGCATGTGAgga
V$TFE_Q6 | 7 (+) | gCATGTGa
V$USF_C | 7 (-) | gCATGTGa
V$SREBP1_02 | 11 (-) | GTGAGGAGATa
V$GATA2_01 | 15 (+) | ggaGATaccc
V$NFKAPPAB50_01 | 15 (-) | GGAGATACCC
V$OLF1_01 | 17 (-) | agataccCTCCGTGGAATagcc
V$PAX9_B | 18 (+) | gatACCCTCCGTGGAATAgccaga
V$CP2_01 | 30 (+) | GGAATAGCCAG
V$PAX8_B | 45 (-) | caactCACCCttggcagt
V$PAX8_01 | 47 (-) | actCAcccttggcag
V$ROAZ_01 | 49 (-) | tCACCCTTGGCAGT
V$GCM_Q2 | 68 (-) | aATGCGGTccag
V$MEIS1_01 | 84 (+) | ttaTGACAGgca
V$P53_DECAMER_Q2 | 91 (+) | aggCATGgct
V$TGIF_01 | 107 (-) | GTCTGACAGCT
V$PBX_Q3 | 119 (+) | GATTCAttgttg
V$CDP_01 | 120 (-) | ATTCATTGTTGG
V$HNF3B_01 | 121 (+) | ttcATTGTTGGTTTa
V$HNF3_Q6_01 | 121 (+) | ttcatTGTTGgtttaata
V$ACAAT_B | 123 (+) | cATTGTTGG
V$FOX_Q2 | 123 (+) | catTGTTGGTTTa
V$HFH4_01 | 123 (+) | cattGTTGGTTTA
V$DTYPEPA_B | 131 (-) | GTTTAATAGC
V$NFY_Q6_01 | 134 (+) | taatagCCAATcg
V$CAAT_01 | 135 (+) | aatagCCAATcg
V$NFY_01 | 135 (+) | aatagCCAATcgtcgg
V$NFY_Q6 | 137 (+) | tagCCAATcgt
V$HOXA7_01 | 140 (+) | cCAATCG
V$ATF1_Q6 | 151 (+) | TTTTGACGACA
V$ATF_B | 153 (+) | tTGACGAcacac
V$CREBATF_Q6 | 153 (+) | tTGACGaca
V$CREB_Q3 | 153 (-) | tTGACG
V$BACH2_01 | 155 (-) | gaCGACACAcg
V$AHRHIF_Q6 | 159 (-) | acaCACGtc
V$BRACH_01 | 162 (+) | cacgTCTAATGTAGGTTGGAATAt
V$ZEC_01 | 168 (+) | TAATGTAGGTTGG
V$AMEF2_Q6 | 178 (+) | tggaaTATAAAAAGCcct
V$TATA_01 | 182 (+) | aTATAAAaagccctc
V$CP2_02 | 207 (-) | CAAGATTCACCCAGa
V$VDR_Q6 | 209 (-) | aGATTCAcccag
V$E2_Q6 | 213 (+) | tcACCCAGAGTGGTga
V$E2_Q6_01 | 214 (-) | cACCCAGAGTGGTgag
V$CHOP_01 | 235 (-) | tcggATTGCAttc
>A.carolinensis
V$STRA13_01 | 4 (+) | tcaGCATGTGAgga
V$TFE_Q6 | 7 (+) | gCATGTGa
V$USF_C | 7 (-) | gCATGTGa
V$SREBP1_02 | 11 (-) | GTGAGGAGATa
V$GATA2_01 | 15 (+) | ggaGATaccc
V$NFKAPPAB50_01 | 15 (-) | GGAGATACCC
V$OLF1_01 | 17 (-) | agataccCTCGATGGAACagtc
V$PR_Q2 | 27 (+) | gatgGAACAg
V$COMP1_01 | 48 (+) | gcttagCTTTGGCAGTAAcagaat
V$E2F1_Q4 | 55 (+) | tTTGGCAG
V$T3R_01 | 68 (+) | gaaTAAGGTCTAgcaa
V$CREB_Q3 | 87 (-) | aTGACG
V$CDC5_01 | 99 (+) | GCTTTAACATCt
V$RP58_01 | 102 (+) | ttAACATCTGAc
V$MEIS1_01 | 107 (+) | atcTGACAGcta
V$TGIF_01 | 107 (-) | ATCTGACAGCT
V$PAX6_01 | 117 (+) | tagaTTCATTGTTGGTTtaac
V$PBX_Q3 | 119 (+) | GATTCAttgttg
V$CDP_01 | 120 (-) | ATTCATTGTTGG
V$HNF3B_01 | 121 (+) | ttcATTGTTGGTTTa
V$HNF3_Q6_01 | 121 (+) | ttcatTGTTGgtttaaca
V$ACAAT_B | 123 (+) | cATTGTTGG
V$FOX_Q2 | 123 (+) | catTGTTGGTTTa
V$HFH4_01 | 123 (+) | cattGTTGGTTTA
V$NFY_Q6_01 | 134 (+) | taacagCCAATca
V$CAAT_01 | 135 (+) | aacagCCAATca
V$NFY_01 | 135 (+) | aacagCCAATcaccac
V$NFY_C | 135 (-) | aacAGCCAATCAcc
V$ALPHACP1_01 | 137 (+) | CAGCCAATCAC
V$NFY_Q6 | 137 (+) | cagCCAATcac
V$ACAAT_B | 137 (-) | CAGCCAATc
V$CAAT_C | 139 (+) | gCCAATCACCACTTTTGACGACACA
V$ATF1_Q6 | 151 (+) | TTTTGACGACA
V$CREBATF_Q6 | 153 (+) | tTGACGaca
V$CREB_Q3 | 153 (-) | tTGACG
V$EVI1_01 | 154 (+) | tGACGACACAAGCTAA
V$HOX13_01 | 154 (-) | tGACGACACAAGCTAATGAAGGGTTGGGAa
V$EVI1_06 | 161 (+) | ACAAGCTAA
V$IK1_01 | 175 (+) | ggttGGGAAtata
V$IK2_01 | 175 (+) | ggttGGGAatat
V$IK3_01 | 175 (+) | ggttGGGAATATa
V$PITX2_Q2 | 177 (-) | ttGGGAATAta
V$AMEF2_Q6 | 179 (+) | gggaaTATAAAAAGCcct
V$MMEF2_Q6 | 179 (+) | gggaaTATAAAaagcc
V$TATA_01 | 183 (+) | aTATAAAaagccctc
V$OLF1_01 | 208 (+) | caagATTCACCAGAGtggtgac
V$CREB_02 | 222 (+) | gtGGTGACTtgt
V$E4F1_Q6 | 225 (-) | GTGACTTGtc
V$P53_02 | 226 (+) | tGACTTGtct
V$P53_DECAMER_Q2 | 226 (-) | tgaCTTGtct
>P.bivittatus
V$STRA13_01 | 4 (+) | tcaGCATGTGAgca
V$USF_Q6_01 | 5 (+) | cagCATGTGagc
V$TFE_Q6 | 7 (+) | gCATGTGa
V$USF_C | 7 (-) | gCATGTGa
V$OLF1_01 | 17 (-) | agatactCTCTATGGAATaatc
V$CMAF_01 | 29 (-) | tggaataaTCAGCAaacca
V$HNF4_Q6_02 | 47 (+) | AGTTCA
V$ALPHACP1_01 | 52 (-) | ATCATTGGCAG
V$NFY_Q6_01 | 53 (-) | tcATTGGcagaaa
V$ACAAT_B | 54 (+) | cATTGGCAG
V$NF1_Q6 | 54 (+) | caTTGGCagaaacaaaat
V$SRY_01 | 63 (+) | AAACaaa
V$MIF1_01 | 69 (-) | aatGCAGCCAAGCAACtt
V$RFX1_01 | 70 (+) | atGCAGCCAAGCAACtt
V$CAAT_01 | 71 (+) | tgcagCCAAGca
V$NFY_C | 71 (-) | tgcAGCCAAGCAac
V$MEIS1_01 | 85 (+) | ttaTGACAGaca
V$SMAD_Q6_01 | 87 (+) | atgaCAGACac
V$SMAD3_Q6 | 88 (-) | TGACAGACa
V$ZID_01 | 97 (+) | cGGCTGTAACATC
V$RP58_01 | 102 (+) | gtAACATCTGAc
V$MEIS1_01 | 107 (+) | atcTGACAGcta
V$TGIF_01 | 107 (-) | ATCTGACAGCT
V$PLZF_02 | 119 (-) | GATTCATTATTGGTTTAACAGCCAATCAt
V$CDP_01 | 120 (-) | ATTCATTATTGG
V$HNF3B_01 | 121 (+) | ttcATTATTGGTTTa
V$HNF3_Q6_01 | 121 (+) | ttcatTATTGgtttaaca
V$FOX_Q2 | 123 (+) | catTATTGGTTTa
V$NFY_Q6 | 124 (-) | attATTGGttt
V$CAAT_01 | 125 (-) | ttATTGGtttaa
V$HNF6_Q6 | 125 (-) | ttATTGGTTTaa
V$NFY_Q6_01 | 125 (-) | ttATTGGtttaac
V$NFY_Q6_01 | 134 (+) | taacagCCAATca
V$CAAT_01 | 135 (+) | aacagCCAATca
V$NFY_01 | 135 (+) | aacagCCAATcattag
V$NFY_C | 135 (-) | aacAGCCAATCAtt
V$ALPHACP1_01 | 137 (+) | CAGCCAATCAT
V$NFY_Q6 | 137 (+) | cagCCAATcat
V$ACAAT_B | 137 (-) | CAGCCAATc
V$IPF1_Q4_01 | 140 (+) | ccaatCATTAgtttt
V$IPF1_Q4 | 142 (-) | aaTCATTAGTTT
V$PAX3_01 | 147 (-) | ttagTTTTGACGA
V$ATF1_Q6 | 151 (+) | TTTTGACGACA
V$CREBATF_Q6 | 153 (+) | tTGACGaca
V$CREB_Q3 | 153 (-) | tTGACG
V$AMEF2_Q6 | 178 (+) | tggaaTATAAAAAGCcct
V$TATA_01 | 182 (+) | aTATAAAaagccctc
V$OLF1_01 | 207 (+) | caagATTCACCAGAGtggtgag
V$FOXP3_Q4 | 223 (+) | ggtgaGTTGTCTCAGAt
>P.mucrosquamatus
V$STRA13_01 | 4 (+) | tcaGCATGTGAgca
V$USF_Q6_01 | 5 (+) | cagCATGTGagc
V$TFE_Q6 | 7 (+) | gCATGTGa
V$USF_C | 7 (-) | gCATGTGa
V$OLF1_01 | 17 (-) | agatactCTCTATGGAATaata
V$PAX4_02 | 31 (+) | gAATAATAAgc
V$OCT1_05 | 35 (-) | aaTAAGCAAACtag
V$RORA2_01 | 41 (+) | caAACTAGTTCAt
V$HNF1_Q6 | 46 (+) | taGTTCATCATtggcaga
V$HNF4_Q6_02 | 47 (+) | AGTTCA
V$ALPHACP1_01 | 52 (-) | ATCATTGGCAG
V$NFY_Q6_01 | 53 (-) | tcATTGGcagaaa
V$ACAAT_B | 54 (+) | cATTGGCAG
V$NF1_Q6 | 54 (+) | caTTGGCagaaacaaaat
V$SRY_01 | 63 (+) | AAACaaa
V$AIRE_02 | 68 (-) | aAATACAGCCAACCAATTTATGACA
V$ACAAT_B | 77 (-) | CAACCAATt
V$CDXA_01 | 83 (+) | aTTtatg
V$MEIS1_01 | 85 (+) | ttaTGACAGaca
V$SMAD_Q6_01 | 87 (+) | atgaCAGACac
V$PLZF_02 | 88 (-) | TGACAGACACAGCTTTAACATCTGACAGc
V$SMAD3_Q6 | 88 (-) | TGACAGACa
V$CDC5_01 | 99 (+) | GCTTTAACATCt
V$RP58_01 | 102 (+) | ttAACATCTGAc
V$MEIS1_01 | 107 (+) | atcTGACAGcta
V$TGIF_01 | 107 (-) | ATCTGACAGCT
V$PLZF_02 | 119 (-) | GATTCATTATTGGTTTAACAGCCAATCAt
V$CDP_01 | 120 (-) | ATTCATTATTGG
V$HNF3B_01 | 121 (+) | ttcATTATTGGTTTa
V$HNF3_Q6_01 | 121 (+) | ttcatTATTGgtttaaca
V$FOX_Q2 | 123 (+) | catTATTGGTTTa
V$NFY_Q6 | 124 (-) | attATTGGttt
V$CAAT_01 | 125 (-) | ttATTGGtttaa
V$HNF6_Q6 | 125 (-) | ttATTGGTTTaa
V$NFY_Q6_01 | 125 (-) | ttATTGGtttaac
V$NFY_Q6_01 | 134 (+) | taacagCCAATca
V$CAAT_01 | 135 (+) | aacagCCAATca
V$NFY_01 | 135 (+) | aacagCCAATcattag
V$NFY_C | 135 (-) | aacAGCCAATCAtt
V$ALPHACP1_01 | 137 (+) | CAGCCAATCAT
V$NFY_Q6 | 137 (+) | cagCCAATcat
V$ACAAT_B | 137 (-) | CAGCCAATc
V$IPF1_Q4_01 | 140 (+) | ccaatCATTAgtttt
V$IPF1_Q4 | 142 (-) | aaTCATTAGTTT
V$PAX3_01 | 147 (-) | ttagTTTTGACGA
V$ATF1_Q6 | 151 (+) | TTTTGACGACA
V$CREBATF_Q6 | 153 (+) | tTGACGaca
V$CREB_Q3 | 153 (-) | tTGACG
V$MYOD_01 | 157 (-) | cgaCACATGtct
V$USF_Q6 | 158 (+) | gaCACATGtc
V$P53_DECAMER_Q2 | 159 (-) | acaCATGtct
V$FXR_Q3 | 165 (-) | GTCTAATGAAGTTg
V$AMEF2_Q6 | 177 (+) | tggaaTATAAAAAGCcct
V$TATA_01 | 181 (+) | aTATAAAaagccctc
V$HTF_01 | 211 (-) | ttcagtgtTGAAGTGTCtcagatt
V$XBP1_01 | 215 (+) | gtgtTGAAGTGtctcag
V$NKX25B_1 | 219 (+) | tgAAGTG
>T.sirtalis
V$STRA13_01 | 4 (+) | tcaGCATGTGAgca
VV$USF_Q6_01 | 5 (+) | cagCATGTGagc
VV$TFE_Q6 | 7 (+) | gCATGTGa
VV$USF_C | 7 (-) | gCATGTGa
VV$OLF1_01 | 17 (-) | agatactCTCTAAGGAATaata
VV$IK3_01 | 25 (+) | tctaAGGAATAAt
VV$PAX4_02 | 31 (+) | gAATAATAAgc
VV$PAX4_04 | 31 (+) | gAATAATAAGCAAACCAAATTCATCATTGg
VV$HFH4_01 | 37 (-) | TAAGCAAACcaaa
VV$CDP_01 | 49 (-) | ATTCATCATTGG
VV$ALPHACP1_01 | 53 (-) | ATCATTGGCAG
VV$NFY_Q6_01 | 54 (-) | tcATTGGcagaaa
VV$ACAAT_B | 55 (+) | cATTGGCAG
VV$NF1_Q6 | 55 (+) | caTTGGCagaaacaaaat
VV$SRY_01 | 64 (+) | AAACaaa
VV$RUSH1A_02 | 82 (+) | aaaCTTATga
VV$MEIS1_01 | 86 (+) | ttaTGACAGata
VV$TGIF_01 | 86 (-) | TTATGACAGAT
VV$PLZF_02 | 89 (-) | TGACAGATACAGCTTTAACATCTGACAGc
VV$CDC5_01 | 100 (+) | GCTTTAACATCt
VV$RP58_01 | 103 (+) | ttAACATCTGAc
VV$MEIS1_01 | 108 (+) | atcTGACAGcta
VV$TGIF_01 | 108 (-) | ATCTGACAGCT
VV$PLZF_02 | 120 (-) | GATTCATTATTGGTTTAACAGCCAATCAt
VV$CDP_01 | 121 (-) | ATTCATTATTGG
VV$HNF3B_01 | 122 (+) | ttcATTATTGGTTTa
VV$HNF3_Q6_01 | 122 (+) | ttcatTATTGgtttaaca
VV$FOX_Q2 | 124 (+) | catTATTGGTTTa
VV$NFY_Q6 | 125 (-) | attATTGGttt
VV$CAAT_01 | 126 (-) | ttATTGGtttaa
VV$HNF6_Q6 | 126 (-) | ttATTGGTTTaa
VV$NFY_Q6_01 | 126 (-) | ttATTGGtttaac
VV$NFY_Q6_01 | 135 (+) | taacagCCAATca
VV$CAAT_01 | 136 (+) | aacagCCAATca
VV$NFY_01 | 136 (+) | aacagCCAATcattag
VV$NFY_C | 136 (-) | aacAGCCAATCAtt
VV$ALPHACP1_01 | 138 (+) | CAGCCAATCAT
VV$NFY_Q6 | 138 (+) | cagCCAATcat
VV$ACAAT_B | 138 (-) | CAGCCAATc
VV$IPF1_Q4_01 | 141 (+) | ccaatCATTAgtttt
VV$IPF1_Q4 | 143 (-) | aaTCATTAGTTT
VV$PAX3_01 | 148 (-) | ttagTTTTGACGA
VV$ATF1_Q6 | 152 (+) | TTTTGACGACA
VV$CREBATF_Q6 | 154 (+) | tTGACGaca
VV$CREB_Q3 | 154 (-) | tTGACG
VV$MYOD_01 | 158 (-) | cgaCACATGtct
VV$USF_Q6 | 159 (+) | gaCACATGtc
VV$P53_DECAMER_Q2 | 160 (-) | acaCATGtct
VV$AMEF2_Q6 | 179 (+) | tggaaTATAAAAAGCcct
VV$TATA_01 | 183 (+) | aTATAAAaagccctc
VV$OLF1_01 | 208 (+) | caagATTCACCAGAGtgttgag
VV$FOXP3_Q4 | 224 (+) | gttgaGTTGTCTCAGAt
>P.sinensis
V$TFIIA_Q6 | 8 (+) | TATGTGAGGaga
V$SREBP1_02 | 11 (-) | GTGAGGAGATa
V$GATA2_01 | 17 (-) | agatATCctc
V$CBF_01 | 27 (+) | tacagaGTGGtcagat
V$CBF_02 | 27 (+) | tacagaGTGGtcagat
V$NFY_Q6 | 29 (-) | cagAGTGGtca
V$GATA1_04 | 36 (+) | gtcaGATAAatca
V$GFI1_01 | 36 (+) | gtcAGATAAATCAGTTCACCCttg
V$GFI1_Q6 | 41 (+) | ataAATCagttca
V$GFI1B_01 | 42 (+) | tAAATCAGTTCa
V$PAX6_01 | 46 (+) | tcagTTCACCCTTGGCTgtaa
V$BRACH_01 | 47 (-) | cAGTTCACCCTTGGCTGTAAcaaa
V$PAX8_B | 47 (-) | cagttCACCCttggctgt
V$HNF4_Q6_02 | 48 (+) | AGTTCA
V$PAX8_01 | 49 (-) | gttCAcccttggctg
V$ROAZ_01 | 51 (+) | TCACCCTTGGCTGt
V$ROAZ_01 | 51 (-) | tCACCCTTGGCTGT
V$EVI1_06 | 74 (-) | CTATCTAGT
V$CEBP_C | 80 (-) | agTGACTTGTGACAGACa
V$MEIS1_01 | 86 (+) | ttgTGACAGaca
V$SMAD3_Q6 | 89 (-) | TGACAGACa
V$FXR_IR1_Q6 | 97 (-) | aGGGCTTTAACCT
V$ARP1_01 | 103 (+) | TTAACCTCTGACAGct
V$MEIS1_01 | 108 (+) | ctcTGACAGcta
V$TGIF_01 | 108 (-) | CTCTGACAGCT
V$STAF_01 | 115 (-) | agcTAGATTCATTGTTGGtaca
V$PBX_Q3 | 120 (+) | GATTCAttgttg
V$CDP_01 | 121 (-) | ATTCATTGTTGG
V$ACAAT_B | 124 (+) | cATTGTTGG
V$NFY_Q6_01 | 135 (+) | caacagCCAATca
V$CAAT_01 | 136 (+) | aacagCCAATca
V$NFY_01 | 136 (+) | aacagCCAATcatcgg
V$NFY_C | 136 (-) | aacAGCCAATCAtc
V$ALPHACP1_01 | 138 (+) | CAGCCAATCAT
V$NFY_Q6 | 138 (+) | cagCCAATcat
V$ACAAT_B | 138 (-) | CAGCCAATc
V$CAAT_C | 140 (+) | gCCAATCATCGGTTTTGACGACATG
V$CDP_01 | 141 (+) | CCAATCATCGGT
V$ATF1_Q6 | 152 (+) | TTTTGACGACA
V$CREB_Q4 | 153 (+) | ttTGACGACAtg
V$CREBATF_Q6 | 154 (+) | tTGACGaca
V$CREB_Q3 | 154 (-) | tTGACG
V$BACH2_01 | 161 (+) | caTGAGTCTac
V$SMAD_Q6_01 | 164 (-) | gaGTCTAccca
V$FOXM1_01 | 176 (+) | AGTTGGAGT
V$TATA_C | 182 (+) | aGTATAAAAg
V$ATATA_B | 183 (+) | gTATAAAAGt
V$TATA_01 | 183 (+) | gTATAAAagtcctct
V$TBP_Q6 | 183 (-) | gtATAAA
V$BACH2_01 | 207 (-) | taTGATTCAcc
V$E2F_Q3 | 232 (+) | TTTCTCGG
V$PITX2_Q2 | 235 (-) | ctCGGATTAta
>C.picta
V$TFIIA_Q6 | 8 (+) | TATGTGAGGaga
V$SREBP1_02 | 11 (-) | GTGAGGAGATa
V$CBF_01 | 27 (+) | tacagaGTGGtcagat
V$CBF_02 | 27 (+) | tacagaGTGGtcagat
V$NFY_Q6 | 29 (-) | cagAGTGGtca
V$GATA1_04 | 36 (+) | gtcaGATAAatca
V$GFI1_01 | 36 (+) | gtcAGATAAATCAGTTCACCCttg
V$GFI1_Q6 | 41 (+) | ataAATCagttca
V$GFI1B_01 | 42 (+) | tAAATCAGTTCa
V$PAX6_01 | 46 (+) | tcagTTCACCCTTGGCTgtaa
V$BRACH_01 | 47 (-) | cAGTTCACCCTTGGCTGTAAcaaa
V$PAX8_B | 47 (-) | cagttCACCCttggctgt
V$HNF4_Q6_02 | 48 (+) | AGTTCA
V$PAX8_01 | 49 (-) | gttCAcccttggctg
V$ROAZ_01 | 51 (+) | TCACCCTTGGCTGt
V$ROAZ_01 | 51 (-) | tCACCCTTGGCTGT
V$SMAD_Q6 | 71 (-) | atgctGTCT
V$EFC_Q6 | 73 (-) | gCTGTCTAGtgact
V$CEBP_C | 80 (-) | agTGACTTGTGACAGACa
V$MEIS1_01 | 86 (+) | ttgTGACAGaca
V$SMAD3_Q6 | 89 (-) | TGACAGACa
V$FXR_IR1_Q6 | 97 (-) | aGGGCTTTAACCT
V$ARP1_01 | 103 (+) | TTAACCTCTGACAGct
V$MEIS1_01 | 108 (+) | ctcTGACAGcta
V$TGIF_01 | 108 (-) | CTCTGACAGCT
V$STAF_01 | 115 (-) | agcTAGATTCATTGTTGGtaca
V$PBX_Q3 | 120 (+) | GATTCAttgttg
V$CDP_01 | 121 (-) | ATTCATTGTTGG
V$ACAAT_B | 124 (+) | cATTGTTGG
V$NFY_Q6_01 | 135 (+) | caacagCCAATca
V$CAAT_01 | 136 (+) | aacagCCAATca
V$NFY_01 | 136 (+) | aacagCCAATcatcgg
V$NFY_C | 136 (-) | aacAGCCAATCAtc
V$ALPHACP1_01 | 138 (+) | CAGCCAATCAT
V$NFY_Q6 | 138 (+) | cagCCAATcat
V$ACAAT_B | 138 (-) | CAGCCAATc
V$CDP_01 | 141 (+) | CCAATCATCGGT
V$ATF1_Q6 | 152 (+) | TTTTGACGACA
V$CREBATF_Q6 | 154 (+) | tTGACGaca
V$CREB_Q3 | 154 (-) | tTGACG
V$TAACC_B | 157 (+) | aCGACACAAGTCTAACCAAAGtt
V$CEBP_01 | 166 (-) | gtcTAACCAaagt
V$FOXM1_01 | 176 (+) | AGTTGGAGT
V$TATA_C | 182 (+) | aGTATAAAAg
V$ATATA_B | 183 (+) | gTATAAAAGc
V$TATA_01 | 183 (+) | gTATAAAagccctct
V$TBP_Q6 | 183 (-) | gtATAAA
V$GZF1_01 | 184 (-) | TATAAAAGCCCT
V$BACH2_01 | 207 (-) | taTGATTCAcc
V$HES1_Q2 | 214 (+) | caccATTGTGgcaag
V$E2F_Q3 | 232 (+) | TTTCTCGG
V$PITX2_Q2 | 235 (-) | ctCGGATTAta
>C.mydas
V$TFIIA_Q6 | 8 (+) | TATGTGAGGaga
V$SREBP1_02 | 11 (-) | GTGAGGAGATa
V$GATA2_01 | 17 (-) | agatATCctc
V$CBF_01 | 27 (+) | tacagaGTGGtcagat
V$CBF_02 | 27 (+) | tacagaGTGGtcagat
V$NFY_Q6 | 29 (-) | cagAGTGGtca
V$GATA1_04 | 36 (+) | gtcaGATAAatca
V$GFI1_01 | 36 (+) | gtcAGATAAATCAGTTCACCCtgg
V$GFI1_Q6 | 41 (+) | ataAATCagttca
V$GFI1B_01 | 42 (+) | tAAATCAGTTCa
V$ER_Q6 | 46 (-) | tcaGTTCAccctgggctgt
V$PAX8_B | 47 (-) | cagttCACCCtgggctgt
V$HNF4_Q6_02 | 48 (+) | AGTTCA
V$ROAZ_01 | 51 (-) | tCACCCTGGGCTGT
V$PAX6_Q2 | 56 (+) | CTGGGCTGTAACAa
V$SMAD_Q6 | 71 (-) | atgctGTCT
V$EFC_Q6 | 73 (-) | gCTGTCTAGtgact
V$CEBP_C | 80 (-) | agTGACTTGTGACAGACa
V$MEIS1_01 | 86 (+) | ttgTGACAGaca
V$SMAD3_Q6 | 89 (-) | TGACAGACa
V$FXR_IR1_Q6 | 97 (-) | aGGGCTTTAACCT
V$ARP1_01 | 103 (+) | TTAACCTCTGACAGct
V$MEIS1_01 | 108 (+) | ctcTGACAGcta
V$TGIF_01 | 108 (-) | CTCTGACAGCT
V$STAF_01 | 115 (-) | agcTAGATTCATTGTTGGtaca
V$PBX_Q3 | 120 (+) | GATTCAttgttg
V$CDP_01 | 121 (-) | ATTCATTGTTGG
V$ACAAT_B | 124 (+) | cATTGTTGG
V$NFY_Q6_01 | 135 (+) | caacagCCAATca
V$CAAT_01 | 136 (+) | aacagCCAATca
V$NFY_01 | 136 (+) | aacagCCAATcatcgg
V$NFY_C | 136 (-) | aacAGCCAATCAtc
V$ALPHACP1_01 | 138 (+) | CAGCCAATCAT
V$NFY_Q6 | 138 (+) | cagCCAATcat
V$ACAAT_B | 138 (-) | CAGCCAATc
V$CAAT_C | 140 (+) | gCCAATCATCGGTTTTGACGACACG
V$CDP_01 | 141 (+) | CCAATCATCGGT
V$ATF1_Q6 | 152 (+) | TTTTGACGACA
V$CREB_Q4 | 153 (+) | ttTGACGACAcg
V$CREBP1_Q2 | 153 (-) | ttTGACGACAcg
V$CREBATF_Q6 | 154 (+) | tTGACGaca
V$CREB_Q3 | 154 (-) | tTGACG
V$NMYC_01 | 158 (-) | cgaCACGAGtct
V$USF_Q6 | 159 (+) | gaCACGAGtc
V$CEBP_01 | 166 (-) | gtcTAACCAaagt
V$FOXM1_01 | 176 (+) | AGTTGGAGT
V$TATA_C | 182 (+) | aGTATAAAAg
V$ATATA_B | 183 (+) | gTATAAAAGc
V$TATA_01 | 183 (+) | gTATAAAagccctct
V$TBP_Q6 | 183 (-) | gtATAAA
V$GZF1_01 | 184 (-) | TATAAAAGCCCT
V$DEAF1_02 | 193 (-) | cctctTCGAAAATATATGATtcacc
V$BACH2_01 | 207 (-) | taTGATTCAcc
V$E2F_Q3 | 232 (+) | TTTCTCGG
V$PITX2_Q2 | 235 (-) | ctCGGATTAta
>A.mississippiensis
V$CDPCR3_01 | 10 (+) | CACGAAGAGATATGC
V$GFI1_01 | 36 (+) | tccAGATAAATCAGTTCACCCtta
V$GFI1_Q6 | 41 (+) | ataAATCagttca
V$GFI1B_01 | 42 (+) | tAAATCAGTTCa
V$ER_Q6 | 46 (-) | tcaGTTCAcccttagctgt
V$BRACH_01 | 47 (+) | cagtTCACCCTTAGCTGTAACAAg
V$BRACH_01 | 47 (-) | cAGTTCACCCTTAGCTGTAAcaag
V$PAX8_B | 47 (-) | cagttCACCCttagctgt
V$HNF4_Q6_02 | 48 (+) | AGTTCA
V$PAX8_01 | 49 (-) | gttCAcccttagctg
V$ROAZ_01 | 51 (-) | tCACCCTTAGCTGT
V$PAX6_Q2 | 56 (+) | CTTAGCTGTAACAa
V$SMAD_Q6 | 71 (-) | atgctGTCT
V$EFC_Q6 | 73 (-) | gCTGTCTAGtgacg
V$HTF_01 | 74 (-) | ctgtctagTGACGTGTGacagaca
V$PAX2_01 | 77 (+) | tctaGTGACGtgtgacaga
V$CREB_02 | 78 (+) | ctAGTGACGtgt
V$XBP1_01 | 78 (+) | ctagTGACGTGtgacag
V$ATF_01 | 79 (+) | tagTGACGTgtgac
V$CREBP1_Q2 | 80 (+) | agTGACGTGTga
V$ATF_B | 81 (+) | gTGACGTgtgac
V$CREBATF_Q6 | 81 (+) | gTGACGtgt
V$CREB_Q3 | 81 (-) | gTGACG
V$E4F1_Q6 | 81 (-) | GTGACGTGtg
V$ATF6_01 | 82 (+) | TGACGTGT
V$CREB_01 | 82 (+) | TGACGTgt
V$AHRHIF_Q6 | 83 (+) | gaCGTGtga
V$SMAD3_Q6 | 89 (-) | TGACAGACa
V$FXR_IR1_Q6 | 97 (-) | aGGGCTTTAACCT
V$ARP1_01 | 103 (+) | TTAACCTCTGACAGct
V$MEIS1_01 | 108 (+) | ctcTGACAGcta
V$TGIF_01 | 108 (-) | CTCTGACAGCT
V$STAF_01 | 115 (-) | agcTAGATTCATTGTTGGtaaa
V$PBX_Q3 | 120 (+) | GATTCAttgttg
V$CDP_01 | 121 (-) | ATTCATTGTTGG
V$ACAAT_B | 124 (+) | cATTGTTGG
V$FOX_Q2 | 134 (-) | aAAACAACCAatc
V$GFI1_01 | 135 (+) | aaaCAACCAATCATTGGTTTTgac
V$NFY_Q6_01 | 135 (+) | aaacaaCCAATca
V$CAAT_01 | 136 (+) | aacaaCCAATca
V$NFY_01 | 136 (+) | aacaaCCAATcattgg
V$NFY_C | 136 (-) | aacAACCAATCAtt
V$ZEC_01 | 137 (-) | ACAACCAATCATT
V$ALPHACP1_01 | 138 (+) | CAACCAATCAT
V$NFY_Q6 | 138 (+) | caaCCAATcat
V$ACAAT_B | 138 (-) | CAACCAATc
V$PBX1_01 | 140 (+) | ACCAATCAt
V$CDP_01 | 140 (-) | ACCAATCATTGG
V$CDP_01 | 141 (+) | CCAATCATTGGT
V$NFY_01 | 141 (-) | ccaatcATTGGttttg
V$ALPHACP1_01 | 144 (-) | ATCATTGGTTT
V$NFY_Q6 | 144 (-) | atcATTGGttt
V$CAAT_01 | 145 (-) | tcATTGGttttg
V$NFY_Q6_01 | 145 (-) | tcATTGGttttga
V$ATF1_Q6 | 152 (+) | TTTTGACGACA
V$ATF_B | 154 (+) | tTGACGAcacag
V$CREBATF_Q6 | 154 (+) | tTGACGaca
V$CREB_Q3 | 154 (-) | tTGACG
V$ATF1_Q6 | 155 (-) | TGACGACACAG
V$GATA3_03 | 162 (+) | acaGATCTAA
V$OTX_Q1 | 166 (-) | ATCTAATC
V$LEF1B_01 | 171 (-) | atCAAAG
V$TCF4_Q5 | 171 (-) | aTCAAAGt
V$LEF1_Q2 | 172 (+) | TCAAAG
V$FOXM1_01 | 176 (+) | AGTTGGAGT
V$TATA_C | 182 (+) | aGTATAAAAg
V$ATATA_B | 183 (+) | gTATAAAAGc
V$TATA_01 | 183 (+) | gTATAAAagccccct
V$TBP_Q6 | 183 (-) | gtATAAA
V$GZF1_01 | 184 (-) | TATAAAAGCCCC
V$LRF_Q2 | 188 (+) | aaagcCCCC
V$E4BP4_01 | 200 (+) | aaATATGTAAga
V$VBP_01 | 201 (-) | aatatGTAAg
V$GCNF_01 | 232 (-) | tcTCAGCTTGTACTTGcc
V$AP4_Q6 | 233 (+) | ctCAGCTTgt
>A.sinensis
V$CDPCR3_01 | 10 (+) | CACGAAGAGATATGC
V$GFI1_01 | 36 (+) | tccAGATAAATCAGTTCACCCtta
V$GFI1_Q6 | 41 (+) | ataAATCagttca
V$GFI1B_01 | 42 (+) | tAAATCAGTTCa
V$ER_Q6 | 46 (-) | tcaGTTCAcccttagctgt
V$BRACH_01 | 47 (+) | cagtTCACCCTTAGCTGTAACAAg
V$BRACH_01 | 47 (-) | cAGTTCACCCTTAGCTGTAAcaag
V$PAX8_B | 47 (-) | cagttCACCCttagctgt
V$HNF4_Q6_02 | 48 (+) | AGTTCA
V$PAX8_01 | 49 (-) | gttCAcccttagctg
V$ROAZ_01 | 51 (-) | tCACCCTTAGCTGT
V$PAX6_Q2 | 56 (+) | CTTAGCTGTAACAa
V$SMAD_Q6 | 71 (-) | atgctGTCT
V$EFC_Q6 | 73 (-) | gCTGTCTAGtgacg
V$HTF_01 | 74 (-) | ctgtctagTGACGTGTGacagaca
V$PAX2_01 | 77 (+) | tctaGTGACGtgtgacaga
V$CREB_02 | 78 (+) | ctAGTGACGtgt
V$XBP1_01 | 78 (+) | ctagTGACGTGtgacag
V$ATF_01 | 79 (+) | tagTGACGTgtgac
V$CREBP1_Q2 | 80 (+) | agTGACGTGTga
V$ATF_B | 81 (+) | gTGACGTgtgac
V$CREBATF_Q6 | 81 (+) | gTGACGtgt
V$CREB_Q3 | 81 (-) | gTGACG
V$E4F1_Q6 | 81 (-) | GTGACGTGtg
V$ATF6_01 | 82 (+) | TGACGTGT
V$CREB_01 | 82 (+) | TGACGTgt
V$AHRHIF_Q6 | 83 (+) | gaCGTGtga
V$SMAD3_Q6 | 89 (-) | TGACAGACa
V$FXR_IR1_Q6 | 97 (-) | aGGGCTTTAACCT
V$ARP1_01 | 103 (+) | TTAACCTCTGACAGct
V$MEIS1_01 | 108 (+) | ctcTGACAGcta
V$TGIF_01 | 108 (-) | CTCTGACAGCT
V$STAF_01 | 115 (-) | agcTAGATTCATTGTTGGtaaa
V$PBX_Q3 | 120 (+) | GATTCAttgttg
V$CDP_01 | 121 (-) | ATTCATTGTTGG
V$ACAAT_B | 124 (+) | cATTGTTGG
V$FOX_Q2 | 134 (-) | aAAACAACCAatc
V$GFI1_01 | 135 (+) | aaaCAACCAATCATTGGTTTTgac
V$NFY_Q6_01 | 135 (+) | aaacaaCCAATca
V$CAAT_01 | 136 (+) | aacaaCCAATca
V$NFY_01 | 136 (+) | aacaaCCAATcattgg
V$NFY_C | 136 (-) | aacAACCAATCAtt
V$ZEC_01 | 137 (-) | ACAACCAATCATT
V$ALPHACP1_01 | 138 (+) | CAACCAATCAT
V$NFY_Q6 | 138 (+) | caaCCAATcat
V$ACAAT_B | 138 (-) | CAACCAATc
V$PBX1_01 | 140 (+) | ACCAATCAt
V$CDP_01 | 140 (-) | ACCAATCATTGG
V$CDP_01 | 141 (+) | CCAATCATTGGT
V$NFY_01 | 141 (-) | ccaatcATTGGttttg
V$ALPHACP1_01 | 144 (-) | ATCATTGGTTT
V$NFY_Q6 | 144 (-) | atcATTGGttt
V$CAAT_01 | 145 (-) | tcATTGGttttg
V$NFY_Q6_01 | 145 (-) | tcATTGGttttga
V$ATF1_Q6 | 152 (+) | TTTTGACGACA
V$ATF_B | 154 (+) | tTGACGAcacag
V$CREBATF_Q6 | 154 (+) | tTGACGaca
V$CREB_Q3 | 154 (-) | tTGACG
V$ATF1_Q6 | 155 (-) | TGACGACACAG
V$GATA3_03 | 162 (+) | acaGATCTAA
V$OTX_Q1 | 166 (-) | ATCTAATC
V$LEF1B_01 | 171 (-) | atCAAAG
V$TCF4_Q5 | 171 (-) | aTCAAAGt
V$LEF1_Q2 | 172 (+) | TCAAAG
V$FOXM1_01 | 176 (+) | AGTTGGAGT
V$TATA_C | 182 (+) | aGTATAAAAg
V$ATATA_B | 183 (+) | gTATAAAAGc
V$TATA_01 | 183 (+) | gTATAAAagccccct
V$TBP_Q6 | 183 (-) | gtATAAA
V$GZF1_01 | 184 (-) | TATAAAAGCCCC
V$LRF_Q2 | 188 (+) | aaagcCCCC
V$E4BP4_01 | 200 (+) | aaATATGTAAga
V$VBP_01 | 201 (-) | aatatGTAAg
V$GCNF_01 | 232 (-) | tcTCAGCTTGTACTTGcc
V$AP4_Q6 | 233 (+) | ctCAGCTTgt
>S.camelus
V$HIF1_Q5 | 6 (+) | agtATGTGaagg
V$ETS1_B | 13 (-) | gaAGGCATATCCTCt
V$CETS1P54_03 | 15 (-) | aggcataTCCTctatg
V$ETS2_B | 15 (-) | aggcatATCCTCta
V$NKX25B_1 | 29 (+) | tgAAGTG
V$EVI1_02 | 34 (+) | tGACCAGATAA
V$EVI1_06 | 36 (+) | ACCAGATAA
V$GATA1_04 | 36 (+) | accaGATAAatca
V$GFI1_01 | 36 (+) | accAGATAAATCAGTTCACCCttg
V$GFI1_Q6 | 41 (+) | ataAATCagttca
V$GFI1B_01 | 42 (+) | tAAATCAGTTCa
V$PAX6_01 | 46 (+) | tcagTTCACCCTTGGCTgtaa
V$BRACH_01 | 47 (-) | cAGTTCACCCTTGGCTGTAActaa
V$PAX8_B | 47 (-) | cagttCACCCttggctgt
V$HNF4_Q6_02 | 48 (+) | AGTTCA
V$PAX8_01 | 49 (-) | gttCAcccttggctg
V$ROAZ_01 | 51 (+) | TCACCCTTGGCTGt
V$ROAZ_01 | 51 (-) | tCACCCTTGGCTGT
V$NF1_Q6_01 | 55 (-) | ccTTGGCtgtaactaaa
V$PAX6_Q2 | 56 (+) | CTTGGCTGTAACTa
V$FREAC3_01 | 58 (+) | tggctGTAACTAAAcg
V$PAX_Q6 | 61 (+) | CTGTAACTAAA
V$EFC_Q6 | 73 (-) | gCTGTATAGtgact
V$FXR_IR1_Q6 | 97 (-) | aGGGCTTTAACCT
V$ARP1_01 | 103 (+) | TTAACCTCTGACAGct
V$MEIS1_01 | 108 (+) | ctcTGACAGcta
V$TGIF_01 | 108 (-) | CTCTGACAGCT
V$STAF_01 | 115 (-) | agcTAGATTCATTGTTGGtaca
V$PBX_Q3 | 120 (+) | GATTCAttgttg
V$CDP_01 | 121 (-) | ATTCATTGTTGG
V$ACAAT_B | 124 (+) | cATTGTTGG
V$GFI1_01 | 135 (+) | caaCAACCAATCATTGGTTTTgac
V$NFY_Q6_01 | 135 (+) | caacaaCCAATca
V$PBX_Q3 | 135 (-) | caacaaCCAATC
V$CAAT_01 | 136 (+) | aacaaCCAATca
V$NFY_01 | 136 (+) | aacaaCCAATcattgg
V$NFY_C | 136 (-) | aacAACCAATCAtt
V$ZEC_01 | 137 (-) | ACAACCAATCATT
V$ALPHACP1_01 | 138 (+) | CAACCAATCAT
V$NFY_Q6 | 138 (+) | caaCCAATcat
V$ACAAT_B | 138 (-) | CAACCAATc
V$CAAT_C | 140 (+) | aCCAATCATTGGTTTTGACGACATG
V$PBX1_01 | 140 (+) | ACCAATCAt
V$CDP_01 | 140 (-) | ACCAATCATTGG
V$CDP_01 | 141 (+) | CCAATCATTGGT
V$NFY_01 | 141 (-) | ccaatcATTGGttttg
V$ALPHACP1_01 | 144 (-) | ATCATTGGTTT
V$NFY_Q6 | 144 (-) | atcATTGGttt
V$CAAT_01 | 145 (-) | tcATTGGttttg
V$NFY_Q6_01 | 145 (-) | tcATTGGttttga
V$ATF1_Q6 | 152 (+) | TTTTGACGACA
V$CREB_Q4 | 153 (+) | ttTGACGACAtg
V$CREBATF_Q6 | 154 (+) | tTGACGaca
V$CREB_Q3 | 154 (-) | tTGACG
V$ALX4_01 | 161 (+) | CATGAGCCTAATC
V$LEF1B_01 | 171 (-) | atCAAAG
V$TCF4_Q5 | 171 (-) | aTCAAAGt
V$LEF1_Q2 | 172 (+) | TCAAAG
V$FOXM1_01 | 176 (+) | AGTTGGAGT
V$TATA_C | 182 (+) | aGTATAAAAg
V$ATATA_B | 183 (+) | gTATAAAAGc
V$TATA_01 | 183 (+) | gTATAAAagccccct
V$TBP_Q6 | 183 (-) | gtATAAA
V$GZF1_01 | 184 (-) | TATAAAAGCCCC
V$LRF_Q2 | 188 (+) | aaagcCCCC
V$MTATA_B | 195 (-) | ccttggaaTATATAagg
V$TFIIA_Q6 | 203 (+) | TATATAAGGtac
V$RUSH1A_02 | 204 (-) | atATAAGgta
V$CEBPB_02 | 217 (-) | cagTGTGGCAAgct
V$SMAD_Q6 | 226 (-) | aagctGTCT
>A.platyrhynchos
V$DEC_Q1 | 5 (+) | ccgTATGTGAaga
V$MSX1_01 | 5 (+) | ccgTATGTG
V$ETS1_B | 13 (-) | gaAGACATATCCTCt
V$ETS2_B | 15 (-) | agacatATCCTCta
V$EVI1_06 | 36 (+) | ACCAGATAA
V$GATA1_04 | 36 (+) | accaGATAAatca
V$GFI1_01 | 36 (+) | accAGATAAATCAGTTCACCCttg
V$GFI1_Q6 | 41 (+) | ataAATCagttca
V$GFI1B_01 | 42 (+) | tAAATCAGTTCa
V$PAX6_01 | 46 (+) | tcagTTCACCCTTGGCTgtaa
V$BRACH_01 | 47 (-) | cAGTTCACCCTTGGCTGTAActaa
V$PAX8_B | 47 (-) | cagttCACCCttggctgt
V$HNF4_Q6_02 | 48 (+) | AGTTCA
V$PAX8_01 | 49 (-) | gttCAcccttggctg
V$ROAZ_01 | 51 (+) | TCACCCTTGGCTGt
V$ROAZ_01 | 51 (-) | tCACCCTTGGCTGT
V$NF1_Q6_01 | 55 (-) | ccTTGGCtgtaactaaa
V$PAX6_Q2 | 56 (+) | CTTGGCTGTAACTa
V$PAX_Q6 | 61 (+) | CTGTAACTAAA
V$SMAD_Q6 | 71 (-) | atgctGTCT
V$EFC_Q6 | 73 (-) | gCTGTCTAGtgact
V$PAX2_01 | 77 (+) | tctaGTGACTtgtgatcga
V$MYCMAX_02 | 82 (-) | tgaCTTGTGATc
V$FXR_IR1_Q6 | 97 (-) | aGGGCTTTAACCT
V$ARP1_01 | 103 (+) | TTAACCTCTGACAGct
V$MEIS1_01 | 108 (+) | ctcTGACAGcta
V$TGIF_01 | 108 (-) | CTCTGACAGCT
V$PBX_Q3 | 120 (+) | GATTCAttgttg
V$CDP_01 | 121 (-) | ATTCATTGTTGG
V$SOX_Q6 | 122 (+) | tTCATTGTTggga
V$ACAAT_B | 124 (+) | cATTGTTGG
V$NFY_Q6_01 | 135 (+) | caacaaCCAATcg
V$PBX_Q3 | 135 (-) | caacaaCCAATC
V$CAAT_01 | 136 (+) | aacaaCCAATcg
V$NFY_01 | 136 (+) | aacaaCCAATcgttgg
V$NFY_Q6 | 138 (+) | caaCCAATcgt
V$ACAAT_B | 138 (-) | CAACCAATc
V$HOXA7_01 | 141 (+) | cCAATCG
V$CDPCR1_01 | 141 (-) | ccaATCGTTg
V$ATF1_Q6 | 152 (+) | TTTTGACGACA
V$CREB_Q4 | 153 (+) | ttTGACGACAtg
V$CREBATF_Q6 | 154 (+) | tTGACGaca
V$CREB_Q3 | 154 (-) | tTGACG
V$ALX4_01 | 161 (+) | CATGAGCCTAATC
V$LEF1B_01 | 171 (-) | atCAAAG
V$TCF4_Q5 | 171 (-) | aTCAAAGt
V$LEF1_Q2 | 172 (+) | TCAAAG
V$FOXM1_01 | 176 (+) | AGTTGGAGT
V$TATA_C | 182 (+) | aGTATAAAAg
V$ATATA_B | 183 (+) | gTATAAAAGc
V$TATA_01 | 183 (+) | gTATAAAagccccct
V$TBP_Q6 | 183 (-) | gtATAAA
V$GZF1_01 | 184 (-) | TATAAAAGCCCC
V$LRF_Q2 | 188 (+) | aaagcCCCC
V$MTATA_B | 195 (-) | ccttggaaTATATAagg
V$TFIIA_Q6 | 203 (+) | TATATAAGGtac
V$RUSH1A_02 | 204 (-) | atATAAGgta
V$CEBPB_02 | 217 (-) | cagTGTGGCAAgct
V$SMAD_Q6 | 226 (-) | aagctGTCT
>M.gallopavo
V$HTF_01 | 7 (-) | gtatgtgaAGACGTATCctctatg
V$XBP1_01 | 11 (+) | gtgaAGACGTAtcctct
V$CREB_Q2_01 | 11 (-) | gtgaAGACGtatcc
V$E4F1_Q6 | 14 (-) | AAGACGTAtc
V$GATA2_01 | 17 (-) | acgtATCctc
V$TFIIA_Q6 | 27 (+) | TATGAAACCacc
V$EVI1_06 | 36 (+) | ACCAGATAA
V$GATA1_04 | 36 (+) | accaGATAAatca
V$GFI1_01 | 36 (+) | accAGATAAATCAGTTCACCCttg
V$GFI1_Q6 | 41 (+) | ataAATCagttca
V$GFI1B_01 | 42 (+) | tAAATCAGTTCa
V$PAX6_01 | 46 (+) | tcagTTCACCCTTGGCTgtaa
V$BRACH_01 | 47 (-) | cAGTTCACCCTTGGCTGTAActaa
V$PAX8_B | 47 (-) | cagttCACCCttggctgt
V$HNF4_Q6_02 | 48 (+) | AGTTCA
V$PAX8_01 | 49 (-) | gttCAcccttggctg
V$ROAZ_01 | 51 (+) | TCACCCTTGGCTGt
V$ROAZ_01 | 51 (-) | tCACCCTTGGCTGT
V$NF1_Q6_01 | 55 (-) | ccTTGGCtgtaactaaa
V$PAX6_Q2 | 56 (+) | CTTGGCTGTAACTa
V$PAX_Q6 | 61 (+) | CTGTAACTAAA
V$SMAD_Q6 | 71 (-) | atgctGTCT
V$EFC_Q6 | 73 (-) | gCTGTCTAGtgact
V$PAX2_01 | 77 (+) | tctaGTGACTtgtgatcga
V$MYCMAX_02 | 82 (-) | tgaCTTGTGATc
V$FXR_IR1_Q6 | 97 (-) | aGGGCTTTAACCT
V$ARP1_01 | 103 (+) | TTAACCTCTGACAGct
V$MEIS1_01 | 108 (+) | ctcTGACAGcta
V$TGIF_01 | 108 (-) | CTCTGACAGCT
V$PBX_Q3 | 120 (+) | GATTCAttgttg
V$CDP_01 | 121 (-) | ATTCATTGTTGG
V$SOX_Q6 | 122 (+) | tTCATTGTTggga
V$ACAAT_B | 124 (+) | cATTGTTGG
V$AHRARNT_02 | 131 (-) | GGGACAACAACCAATCGTC
V$NFY_Q6_01 | 135 (+) | caacaaCCAATcg
V$PBX_Q3 | 135 (-) | caacaaCCAATC
V$CAAT_01 | 136 (+) | aacaaCCAATcg
V$NFY_01 | 136 (+) | aacaaCCAATcgtcgg
V$ZEC_01 | 137 (-) | ACAACCAATCGTC
V$NFY_Q6 | 138 (+) | caaCCAATcgt
V$ACAAT_B | 138 (-) | CAACCAATc
V$HOXA7_01 | 141 (+) | cCAATCG
V$ATF1_Q6 | 152 (+) | TTTTGACGACA
V$CREB_Q4 | 153 (+) | ttTGACGACAtg
V$CREBATF_Q6 | 154 (+) | tTGACGaca
V$CREB_Q3 | 154 (-) | tTGACG
V$ALX4_01 | 161 (+) | CATGAGCCTAATC
V$LEF1B_01 | 171 (-) | atCAAAG
V$TCF4_Q5 | 171 (-) | aTCAAAGt
V$LEF1_Q2 | 172 (+) | TCAAAG
V$FOXM1_01 | 176 (+) | AGTTGGAGT
V$TATA_C | 182 (+) | aGTATAAAAg
V$ATATA_B | 183 (+) | gTATAAAAGc
V$TATA_01 | 183 (+) | gTATAAAagccccct
V$TBP_Q6 | 183 (-) | gtATAAA
V$GZF1_01 | 184 (-) | TATAAAAGCCCC
V$LRF_Q2 | 188 (+) | aaagcCCCC
V$TATA_01 | 195 (-) | ccttggcaTATATAa
V$GZF1_01 | 197 (+) | TTGGCATATATA
V$GATA4_Q3 | 202 (+) | ATATATAAGGCA
V$TATA_01 | 202 (+) | aTATATAaggcacac
V$TFIIA_Q6 | 203 (+) | TATATAAGGcac
V$SREBP1_Q6 | 212 (+) | CACACCA
>G.gallus
V$HTF_01 | 7 (-) | gtatgtgaAGACGTATCctctacg
V$XBP1_01 | 11 (+) | gtgaAGACGTAtcctct
V$CREB_Q2_01 | 11 (-) | gtgaAGACGtatcc
V$E4F1_Q6 | 14 (-) | AAGACGTAtc
V$GATA2_01 | 17 (-) | acgtATCctc
V$EVI1_06 | 36 (+) | ACCAGATAA
V$GATA1_04 | 36 (+) | accaGATAAatca
V$GFI1_01 | 36 (+) | accAGATAAATCAGTTCACCCttg
V$GFI1_Q6 | 41 (+) | ataAATCagttca
V$GFI1B_01 | 42 (+) | tAAATCAGTTCa
V$PAX6_01 | 46 (+) | tcagTTCACCCTTGGCTgtaa
V$PAX8_B | 47 (-) | cagttCACCCttggctgt
V$HNF4_Q6_02 | 48 (+) | AGTTCA
V$PAX8_01 | 49 (-) | gttCAcccttggctg
V$ROAZ_01 | 51 (+) | TCACCCTTGGCTGt
V$ROAZ_01 | 51 (-) | tCACCCTTGGCTGT
V$NF1_Q6 | 55 (+) | ccTTGGCtgtaaccaaat
V$NF1_Q6_01 | 55 (-) | ccTTGGCtgtaaccaaa
V$SMAD_Q6 | 71 (-) | atgctGTCT
V$EFC_Q6 | 73 (-) | gCTGTCTAGtgact
V$PAX2_01 | 77 (+) | tctaGTGACTtgtgatcga
V$MYCMAX_02 | 82 (-) | tgaCTTGTGATc
V$FXR_IR1_Q6 | 97 (-) | aGGGCTTTAACCT
V$ARP1_01 | 103 (+) | TTAACCTCTGACAGct
V$MEIS1_01 | 108 (+) | ctcTGACAGcta
V$TGIF_01 | 108 (-) | CTCTGACAGCT
V$PBX_Q3 | 120 (+) | GATTCAttgttg
V$CDP_01 | 121 (-) | ATTCATTGTTGG
V$SOX_Q6 | 122 (+) | tTCATTGTTggga
V$ACAAT_B | 124 (+) | cATTGTTGG
V$AHRARNT_02 | 131 (-) | GGGACAACAACCAATCGTC
V$NFY_Q6_01 | 135 (+) | caacaaCCAATcg
V$PBX_Q3 | 135 (-) | caacaaCCAATC
V$CAAT_01 | 136 (+) | aacaaCCAATcg
V$NFY_01 | 136 (+) | aacaaCCAATcgtcgg
V$ZEC_01 | 137 (-) | ACAACCAATCGTC
V$NFY_Q6 | 138 (+) | caaCCAATcgt
V$ACAAT_B | 138 (-) | CAACCAATc
V$HOXA7_01 | 141 (+) | cCAATCG
V$ATF1_Q6 | 152 (+) | TTTTGACGACA
V$CREB_Q4 | 153 (+) | ttTGACGACAtg
V$CREBATF_Q6 | 154 (+) | tTGACGaca
V$CREB_Q3 | 154 (-) | tTGACG
V$ALX4_01 | 161 (+) | CATGAGCCTAATC
V$LEF1B_01 | 171 (-) | atCAAAG
V$TCF4_Q5 | 171 (-) | aTCAAAGt
V$LEF1_Q2 | 172 (+) | TCAAAG
V$FOXM1_01 | 176 (+) | AGTTGGAGT
V$TATA_C | 182 (+) | aGTATAAAAg
V$ATATA_B | 183 (+) | gTATAAAAGc
V$TATA_01 | 183 (+) | gTATAAAagccccct
V$TBP_Q6 | 183 (-) | gtATAAA
V$GZF1_01 | 184 (-) | TATAAAAGCCCC
V$LRF_Q2 | 188 (+) | aaagcCCCC
V$TATA_01 | 195 (-) | ccttggcaTATATAa
V$GZF1_01 | 197 (+) | TTGGCATATATA
V$GATA4_Q3 | 202 (+) | ATATATAAGGCA
V$TATA_01 | 202 (+) | aTATATAaggcacac
V$TFIIA_Q6 | 203 (+) | TATATAAGGcac
V$SREBP1_Q6 | 212 (+) | CACACCA
>C.carolinensis
V$OCT1_01 | 3 (+) | ttcACTATGCAAAAACata
V$FOXP3_Q4 | 7 (-) | cTATGCAAAAACatatc
V$OCT1_B | 8 (+) | tATGCAAAAa
V$OCT_Q6 | 8 (-) | tATGCAAAaac
V$LEF1B_01 | 27 (-) | aaCAAAG
V$PAX4_04 | 28 (+) | aCAAAGCACCCAGATAAATCAGTTCACCCt
V$GFI1_01 | 36 (+) | cccAGATAAATCAGTTCACCCttg
V$GFI1_Q6 | 41 (+) | ataAATCagttca
V$GFI1B_01 | 42 (+) | tAAATCAGTTCa
V$PAX6_01 | 46 (+) | tcagTTCACCCTTGGCTgtaa
V$BRACH_01 | 47 (-) | cAGTTCACCCTTGGCTGTAActaa
V$PAX8_B | 47 (-) | cagttCACCCttggctgt
V$HNF4_Q6_02 | 48 (+) | AGTTCA
V$PAX8_01 | 49 (-) | gttCAcccttggctg
V$ROAZ_01 | 51 (+) | TCACCCTTGGCTGt
V$ROAZ_01 | 51 (-) | tCACCCTTGGCTGT
V$NF1_Q6_01 | 55 (-) | ccTTGGCtgtaactaaa
V$PAX6_Q2 | 56 (+) | CTTGGCTGTAACTa
V$FREAC3_01 | 58 (+) | tggctGTAACTAAAcg
V$PAX_Q6 | 61 (+) | CTGTAACTAAA
V$SMAD_Q6 | 71 (-) | acgctGTCT
V$EFC_Q6 | 73 (-) | gCTGTCTAGtgact
V$PAX2_01 | 77 (+) | tctaGTGACTtgtgatcga
V$MYCMAX_02 | 82 (-) | tgaCTTGTGATc
V$CDPCR3_01 | 117 (-) | CCAGATTCATTGTTG
V$PBX_Q3 | 120 (+) | GATTCAttgttg
V$CDP_01 | 121 (-) | ATTCATTGTTGG
V$SOX_Q6 | 122 (+) | tTCATTGTTggga
V$ACAAT_B | 124 (+) | cATTGTTGG
V$RFX1_02 | 126 (+) | ttGTTGGGACAGCAACca
V$RFX1_02 | 126 (-) | ttGTTGGGACAGCAACca
V$AHRARNT_02 | 131 (-) | GGGACAGCAACCAATCGTC
V$NFY_Q6_01 | 135 (+) | cagcaaCCAATcg
V$PBX_Q3 | 135 (-) | cagcaaCCAATC
V$CAAT_01 | 136 (+) | agcaaCCAATcg
V$NFY_01 | 136 (+) | agcaaCCAATcgtcgg
V$ZEC_01 | 137 (-) | GCAACCAATCGTC
V$NFY_Q6 | 138 (+) | caaCCAATcgt
V$ACAAT_B | 138 (-) | CAACCAATc
V$HOXA7_01 | 141 (+) | cCAATCG
V$PAX3_01 | 148 (-) | tcggGTTTGACGA
V$TAXCREB_01 | 149 (+) | cgGGTTTGACGacat
V$VJUN_01 | 151 (-) | ggtTTGACGACATgag
V$ATF1_Q6 | 152 (+) | GTTTGACGACA
V$ATF_B | 152 (-) | gtttgACGACAt
V$CREB_Q4 | 153 (+) | ttTGACGACAtg
V$CREBATF_Q6 | 154 (+) | tTGACGaca
V$CREB_Q3 | 154 (-) | tTGACG
V$ALX4_01 | 161 (+) | CATGAGCCTAATC
V$MTATA_B | 181 (+) | gagTATAAAaagccccc
V$TATA_C | 182 (+) | aGTATAAAAa
V$TATA_01 | 183 (+) | gTATAAAaagccccc
V$TBP_Q6 | 183 (-) | gtATAAA
V$LRF_Q2 | 189 (+) | aaagcCCCC
V$MTATA_B | 196 (-) | ccttggaaTATATAagg
V$TFIIA_Q6 | 204 (+) | TATATAAGGtac
V$RUSH1A_02 | 205 (-) | atATAAGgta
V$CEBPB_02 | 218 (-) | cagTGTGGCAAgct
V$SMAD_Q6 | 227 (-) | aagctGTCT
>C.anna
V$OCT1_01 | 3 (+) | ttcAGTATGCAAAGGCata
V$OCT1_05 | 6 (-) | agTATGCAAAGgca
V$OCT_C | 7 (-) | gtATGCAAAGGCa
V$OCT1_B | 8 (+) | tATGCAAAGg
V$OCT_Q6 | 8 (-) | tATGCAAAggc
V$STAF_02 | 26 (-) | caGCAAAGCACCCTGATAaat
V$PAX4_04 | 28 (+) | gCAAAGCACCCTGATAAATCAGTTCACCCt
V$GFI1_01 | 36 (+) | cccTGATAAATCAGTTCACCCttg
V$GFI1_Q6 | 41 (+) | ataAATCagttca
V$GFI1B_01 | 42 (+) | tAAATCAGTTCa
V$PAX6_01 | 46 (+) | tcagTTCACCCTTGGCTgtaa
V$BRACH_01 | 47 (-) | cAGTTCACCCTTGGCTGTAActaa
V$PAX8_B | 47 (-) | cagttCACCCttggctgt
V$HNF4_Q6_02 | 48 (+) | AGTTCA
V$PAX8_01 | 49 (-) | gttCAcccttggctg
V$ROAZ_01 | 51 (+) | TCACCCTTGGCTGt
V$ROAZ_01 | 51 (-) | tCACCCTTGGCTGT
V$NF1_Q6_01 | 55 (-) | ccTTGGCtgtaactaaa
V$PAX6_Q2 | 56 (+) | CTTGGCTGTAACTa
V$PAX_Q6 | 61 (+) | CTGTAACTAAA
V$SMAD_Q6 | 71 (-) | atgctGTCT
V$EFC_Q6 | 73 (-) | gCTGTCTAGtgact
V$PAX2_01 | 77 (+) | tctaGTGACTtgtgattga
V$MYCMAX_02 | 82 (-) | tgaCTTGTGATt
V$MEIS1_01 | 90 (+) | gatTGACAGggc
V$LXR_DR4_Q3 | 93 (+) | TGACAGGGCTTTACCC
V$CDPCR3_01 | 117 (-) | CCAGATTCATTGTTG
V$PBX_Q3 | 120 (+) | GATTCAttgttg
V$CDP_01 | 121 (-) | ATTCATTGTTGG
V$SOX_Q6 | 122 (+) | tTCATTGTTggga
V$ACAAT_B | 124 (+) | cATTGTTGG
V$RFX1_02 | 126 (+) | ttGTTGGGACAGCAACca
V$RFX1_02 | 126 (-) | ttGTTGGGACAGCAACca
V$NFY_Q6_01 | 135 (+) | cagcaaCCAATcg
V$PBX_Q3 | 135 (-) | cagcaaCCAATC
V$CAAT_01 | 136 (+) | agcaaCCAATcg
V$NFY_01 | 136 (+) | agcaaCCAATcgttgg
V$CMYB_01 | 137 (+) | gcaaccAATCGTTGGgtt
V$ZEC_01 | 137 (-) | GCAACCAATCGTT
V$NFY_Q6 | 138 (+) | caaCCAATcgt
V$ACAAT_B | 138 (-) | CAACCAATc
V$HOXA7_01 | 141 (+) | cCAATCG
V$CDPCR1_01 | 141 (-) | ccaATCGTTg
V$COMP1_01 | 146 (+) | cgttggGTTTGACGACATgagcct
V$PAX3_01 | 148 (-) | ttggGTTTGACGA
V$TAXCREB_01 | 149 (+) | tgGGTTTGACGacat
V$VJUN_01 | 151 (-) | ggtTTGACGACATgag
V$ATF1_Q6 | 152 (+) | GTTTGACGACA
V$ATF_B | 152 (-) | gtttgACGACAt
V$CREB_Q4 | 153 (+) | ttTGACGACAtg
V$CREBATF_Q6 | 154 (+) | tTGACGaca
V$CREB_Q3 | 154 (-) | tTGACG
V$ALX4_01 | 161 (+) | CATGAGCCTAATC
V$LEF1B_01 | 171 (-) | atCAAAG
V$TCF4_Q5 | 171 (-) | aTCAAAGt
V$LEF1_Q2 | 172 (+) | TCAAAG
V$FOXM1_01 | 176 (+) | AGTTGGAGT
V$MTATA_B | 181 (+) | gagTATAAAaagccccc
V$TATA_C | 182 (+) | aGTATAAAAa
V$TATA_01 | 183 (+) | gTATAAAaagccccc
V$TBP_Q6 | 183 (-) | gtATAAA
V$LRF_Q2 | 189 (+) | aaagcCCCC
V$MTATA_B | 196 (-) | ccttggaaTATATAagg
V$TFIIA_Q6 | 204 (+) | TATATAAGGtag
V$RUSH1A_02 | 205 (-) | atATAAGgta
V$HES1_Q2 | 215 (+) | gaccAGTGTGgcaag
V$CEBPB_02 | 218 (-) | cagTGTGGCAAgct
V$SMAD_Q6 | 227 (-) | aagctGTCT
V$SMAD4_Q6 | 228 (-) | aGCTGTCTCTCCGAT
V$CHOP_01 | 237 (-) | tccgATTGCAttt
>C.pelagica
V$OCT1_01 | 3 (+) | ttcAGTATGCAAAGGCata
V$OCT1_05 | 6 (-) | agTATGCAAAGgca
V$OCT_C | 7 (-) | gtATGCAAAGGCa
V$OCT1_B | 8 (+) | tATGCAAAGg
V$OCT_Q6 | 8 (-) | tATGCAAAggc
V$LEF1TCF1_Q4 | 24 (-) | ctcaaCAAAGt
V$LEF1_Q2_01 | 26 (+) | caaCAAAGtg
V$LEF1B_01 | 27 (-) | aaCAAAG
V$PAX4_04 | 28 (+) | aCAAAGTGCCCAGATAAATCAGTTCACTCt
V$GFI1_01 | 36 (+) | cccAGATAAATCAGTTCACTCttg
V$GFI1_Q6 | 41 (+) | ataAATCagttca
V$GFI1B_01 | 42 (+) | tAAATCAGTTCa
V$PAX6_01 | 46 (+) | tcagTTCACTCTTGGCTgtaa
V$BRACH_01 | 47 (-) | cAGTTCACTCTTGGCTGTAActaa
V$PAX8_B | 47 (-) | cagttCACTCttggctgt
V$HNF4_Q6_02 | 48 (+) | AGTTCA
V$PAX8_01 | 49 (-) | gttCActcttggctg
V$ROAZ_01 | 51 (-) | tCACTCTTGGCTGT
V$TTF1_Q6 | 52 (-) | cactCTTGgctg
V$NF1_Q6_01 | 55 (-) | tcTTGGCtgtaactaaa
V$PAX6_Q2 | 56 (+) | CTTGGCTGTAACTa
V$FREAC3_01 | 58 (+) | tggctGTAACTAAAcg
V$PAX_Q6 | 61 (+) | CTGTAACTAAA
V$SMAD_Q6 | 71 (-) | acgctGTCT
V$EFC_Q6 | 73 (-) | gCTGTCTAGtgact
V$PAX2_01 | 77 (+) | tctaGTGACTtgtgatcga
V$MYCMAX_02 | 82 (-) | tgaCTTGTGATc
V$CDPCR3_01 | 117 (-) | CCAGATTCATTGTTG
V$PBX_Q3 | 120 (+) | GATTCAttgttg
V$CDP_01 | 121 (-) | ATTCATTGTTGG
V$SOX_Q6 | 122 (+) | tTCATTGTTggga
V$ACAAT_B | 124 (+) | cATTGTTGG
V$RFX1_02 | 126 (+) | ttGTTGGGACAGCAACca
V$RFX1_02 | 126 (-) | ttGTTGGGACAGCAACca
V$AHRARNT_02 | 131 (-) | GGGACAGCAACCAATCGTC
V$NFY_Q6_01 | 135 (+) | cagcaaCCAATcg
V$PBX_Q3 | 135 (-) | cagcaaCCAATC
V$CAAT_01 | 136 (+) | agcaaCCAATcg
V$NFY_01 | 136 (+) | agcaaCCAATcgtcgg
V$ZEC_01 | 137 (-) | GCAACCAATCGTC
V$NFY_Q6 | 138 (+) | caaCCAATcgt
V$ACAAT_B | 138 (-) | CAACCAATc
V$HOXA7_01 | 141 (+) | cCAATCG
V$COMP1_01 | 146 (+) | cgtcggGTTTGACGACACaagcct
V$PAX3_01 | 148 (-) | tcggGTTTGACGA
V$TAXCREB_01 | 149 (+) | cgGGTTTGACGacac
V$VJUN_01 | 151 (-) | ggtTTGACGACACaag
V$ATF1_Q6 | 152 (+) | GTTTGACGACA
V$ATF_B | 152 (-) | gtttgACGACAc
V$CREBATF_Q6 | 154 (+) | tTGACGaca
V$CREB_Q3 | 154 (-) | tTGACG
V$GFI1_01 | 162 (+) | acaAGCCTAATCAAAGTTGGAgta
V$LEF1B_01 | 171 (-) | atCAAAG
V$TCF4_Q5 | 171 (-) | aTCAAAGt
V$LEF1_Q2 | 172 (+) | TCAAAG
V$FOXM1_01 | 176 (+) | AGTTGGAGT
V$MTATA_B | 181 (+) | gagTATAAAaagccccc
V$TATA_C | 182 (+) | aGTATAAAAa
V$TATA_01 | 183 (+) | gTATAAAaagccccc
V$TBP_Q6 | 183 (-) | gtATAAA
V$LRF_Q2 | 189 (+) | aaagcCCCC
V$MTATA_B | 196 (-) | ccttggaaTATATAagg
V$TFIIA_Q6 | 204 (+) | TATATAAGGtac
V$RUSH1A_02 | 205 (-) | atATAAGgta
V$HES1_Q2 | 215 (+) | caccAGCGTGgcaag
V$WHN_B | 217 (-) | ccaGCGTggca
V$SMAD_Q6 | 227 (-) | aagctGTCT
>C.livia
V$ETS1_B | 13 (-) | gaAGACATATCCTCt
V$CETS1P54_03 | 15 (-) | agacataTCCTctacg
V$ETS2_B | 15 (-) | agacatATCCTCta
V$AREB6_01 | 35 (-) | actCAGATaaatc
V$GFI1_01 | 36 (+) | ctcAGATAAATCAGTTCACCCttg
V$GFI1_Q6 | 41 (+) | ataAATCagttca
V$GFI1B_01 | 42 (+) | tAAATCAGTTCa
V$PAX6_01 | 46 (+) | tcagTTCACCCTTGGCTgtaa
V$BRACH_01 | 47 (-) | cAGTTCACCCTTGGCTGTAActaa
V$PAX8_B | 47 (-) | cagttCACCCttggctgt
V$HNF4_Q6_02 | 48 (+) | AGTTCA
V$PAX8_01 | 49 (-) | gttCAcccttggctg
V$ROAZ_01 | 51 (+) | TCACCCTTGGCTGt
V$ROAZ_01 | 51 (-) | tCACCCTTGGCTGT
V$NF1_Q6_01 | 55 (-) | ccTTGGCtgtaactaaa
V$PAX6_Q2 | 56 (+) | CTTGGCTGTAACTa
[truncated: 4,429 more rows]
