# Supplementary material for: Genetic Mechanisms Shaping the Evolution of an Ancient Myostatin Promoter/enhancer Across Bony Vertebrates
Source: Research Square preprint supplement (doi:10.21203/rs.3.rs-6733976/v1), 2025-07-23
Supplement: Supplementary file 7 [file f8e08c36dbec7bc71b0a30de.xlsx]

## Sheet: Table S7
Supplemental Table S7. Molecular evolution analyses of MSTN P/E sequences shown in Figure 4 (phyloP Probability).
Lineages	Conservation	Acceleration
Sauropsida	0.9	0.0002*
Squamata	0.9	0.08
Testudines	0.9	0.1
Crocodylia	0.8	0.2
Aves	0.9	0.01*
Mammalia	0.9	0.000003*
Marsupialia	0.9	0.2
Afrotheria	0.9	0.05
Carnivora	0.9	0.1
Chiroptera	0.9	0.01*
Cetartiodactyla	0.8	0.2
Rodentia	0.9	0.02*
Primates	0.9	0.1
Code	Meaning
*	Probabilities under 0.05 are denoted in red bold.
